# Supplementary material for: Turnover Rates of Hepatic Collagen and Circulating Collagen-Associated Proteins in Humans with Chronic Liver Disease
Source: PubMed Central journal article supplement (PMC4409311; doi:10.1371/journal.pone.0123311), 2015-04-24
Supplement: pone.0123311.s002.pdf [file pone.0123311.s002.pdf]

Supplementary Table 1

## Relative protein quantitation (relative abundance units)

|                                                 |                      | Subject<br>#003 | Subject<br>#004 | Subject<br>#005 | Subject<br>#007 | Subject<br>#009 | Subject<br>#011 | Protein<br>Relative<br>Abundance vs<br>Fibrosis Score<br>(r <sup>2</sup> ) |
|-------------------------------------------------|----------------------|-----------------|-----------------|-----------------|-----------------|-----------------|-----------------|----------------------------------------------------------------------------|
|                                                 | Fibrosis<br>Score    | 3               | 0               | 2               | 1               | 4               | 0               |                                                                            |
|                                                 | Uniprot<br>Accession |                 |                 |                 |                 |                 |                 |                                                                            |
| <b>Liver Proteins</b>                           |                      |                 |                 |                 |                 |                 |                 |                                                                            |
| 14-3-3 protein beta/alpha                       | P31946               | 390016          | 171967          | 158083          | 153238          | 279392          | 167419          | 0.51                                                                       |
| 14-3-3 protein eta                              | Q04917               | 90935           | 296191          | 237619          | 502794          | 564718          | 282864          | 0.02                                                                       |
| 17-beta-hydroxysteroid dehydrogenase 13         | Q7Z5P4               | 567760          | 262348          | 305142          | 218436          | 368650          | 284814          | 0.42                                                                       |
| 17-beta-hydroxysteroid dehydrogenase type 6     | O14756               | 243073          | 106063          | 279516          | 124726          | 299060          | 159793          | 0.76                                                                       |
| 2,4-dienoyl-CoA reductase, mitochondrial        | Q16698               | 931314          | 1130684         | 680662          | 753338          | 492344          | 451256          | 0.06                                                                       |
| 3-hydroxyacyl-CoA dehydrogenase type-2          | Q99714               | 511021          | 468255          | 419662          | 348686          | 388496          | 410185          | 0.00                                                                       |
| 3-hydroxyanthranilate 3,4-dioxygenase           | P46952               | 258141          | 166735          | 448526          | 167587          | 142616          | 222749          | 0.01                                                                       |
| 3-ketoacyl-CoA thiolase, mitochondrial          | P42765               | 321019          | 441734          | 645040          | 292564          | 460308          | 699140          | 0.08                                                                       |
| 3-ketoacyl-CoA thiolase, peroxisomal            | P09110               | 324774          | 406957          | 495029          | 239148          | 152220          | 388735          | 0.28                                                                       |
| 3-mercaptopyruvate sulfurtransferase            | P25325               | 272940          | 467186          | 448559          | 511781          | 385653          | 244737          | 0.02                                                                       |
| 40S ribosomal protein S3                        | P23396               | 149467          | 231130          | 143076          | 234760          | 99627           | 246593          | 0.90                                                                       |
| 40S ribosomal protein S7                        | P62081               | 299910          | 179058          | 148195          | 196546          | 131081          | 81042           | 0.10                                                                       |
| 40S ribosomal protein S8                        | P62241               | 14371039        | 1734742         | 1402970         | 1539634         | 10137559        | 1054433         | 0.64                                                                       |
| 40S ribosomal protein SA                        | P08865               | 573125          | 422502          | 308623          | 361275          | 338146          | 327499          | 0.04                                                                       |
| 4-aminobutyrate aminotransferase, mitochondrial | P80404               | 242295          | 442823          | 652004          | 296564          | 139465          | 361289          | 0.21                                                                       |
| 4-hydroxyphenylpyruvate dioxygenase             | P32754               | 366919          | 547351          | 298035          | 85995           | 444299          | 295323          | 0.02                                                                       |
| 4-trimethylaminobutyraldehyde dehydrogenase     | P49189               | 206824          | 291306          | 543668          | 173594          | 108619          | 332114          | 0.13                                                                       |
| 60 kDa heat shock protein, mitochondrial        | P10809               | 407786          | 527707          | 431567          | 238668          | 194147          | 299972          | 0.15                                                                       |
| 60S acidic ribosomal protein P0-like            | Q8NHW5               | 157627          | 239155          | 252211          | 217989          | 178536          | 132906          | 0.02                                                                       |
| 60S acidic ribosomal protein P1                 | P05386               | 310096          | 316654          | 393704          | 266666          | 281847          | 406218          | 0.15                                                                       |
| 60S ribosomal protein L6                        | Q02878               | 179098          | 135891          | 183446          | 134197          | 152592          | 130491          | 0.41                                                                       |

Supplementary Table 1

## Relative protein quantitation (relative abundance units)

|                                                   | Fibrosis Score | Subject #003 | Subject #004 | Subject #005 | Subject #007 | Subject #009 | Subject #011 | Protein Relative Abundance vs Fibrosis Score ( $r^2$ ) |
|---------------------------------------------------|----------------|--------------|--------------|--------------|--------------|--------------|--------------|--------------------------------------------------------|
|                                                   |                | 3            | 0            | 2            | 1            | 4            | 0            |                                                        |
| 6-phosphogluconate dehydrogenase, decarboxylating | P52209         | 267405       | 260327       | 69732        | 172029       | 171175       | 269377       | 0.11                                                   |
| 78 kDa glucose-regulated protein                  | P11021         | 356153       | 521386       | 279327       | 366647       | 160969       | 392771       | 0.71                                                   |
| Abhydrolase domain-containing protein 14B         | Q96IU4         | 474080       | 361309       | 489383       | 304351       | 416608       | 403295       | 0.26                                                   |
| Acetyl-CoA acetyltransferase, cytosolic           | Q9BWD1         | 280092       | 101850       | 472538       | 259826       | 141371       | 155171       | 0.05                                                   |
| Acetyl-CoA acetyltransferase, mitochondrial       | P24752         | 553273       | 828820       | 536354       | 487607       | 335621       | 720691       | 0.72                                                   |
| Aconitate hydratase, mitochondrial                | Q99798         | 126768       | 505977       | 217783       | 343650       | 206941       | 498463       | 0.82                                                   |
| Actin, aortic smooth muscle                       | P62736         | 274081       | 1006743      | 289663       | 640546       | 1006683      | 1162560      | 0.15                                                   |
| Actin, cytoplasmic 1                              | P60709         | 1524953      | 1055774      | 684040       | 1089633      | 1623840      | 741735       | 0.54                                                   |
| Actin-related protein 3B                          | Q9P1U1         | 581457       | 297543       | 497708       | 213656       | 351224       | 375482       | 0.21                                                   |
| Acyl-coenzyme A synthetase ACSM2A, mitochondrial  | Q08AH3         | 128759       | 246929       | 197206       | 226356       | 92803        | 110840       | 0.31                                                   |
| Acyl-coenzyme A synthetase ACSM2B, mitochondrial  | Q68CK6         | 172592       | 285255       | 211214       | 162307       | 168352       | 154503       | 0.13                                                   |
| Acyl-coenzyme A thioesterase 1                    | Q86TX2         | 361557       | 445371       | 454688       | 338046       | 189739       | 405079       | 0.51                                                   |
| Adenine phosphoribosyltransferase                 | P07741         | 156540       | 115399       | 134323       | 185994       | 181011       | 84331        | 0.46                                                   |
| Adenylate kinase 2, mitochondrial                 | P54819         | 155228       | 298321       | 225916       | 182140       | 113274       | 388472       | 0.76                                                   |
| ADP/ATP translocase 1                             | P12235         | 208473       | 477125       | 370758       | 590026       | 455709       | 923308       | 0.41                                                   |
| ADP/ATP translocase 2                             | P05141         | 851979       | 361003       | 383389       | 311278       | 165660       | 1052450      | 0.10                                                   |
| ADP-ribosylation factor 1                         | P84077         | 360803       | 358984       | 354920       | 395486       | 463714       | 335952       | 0.48                                                   |
| Aflatoxin B1 aldehyde reductase member 3          | O95154         | 177556       | 328636       | 236484       | 397982       | 440774       | 145232       | 0.09                                                   |
| Agmatinase, mitochondrial                         | Q9BSE5         | 344353       | 221665       | 171135       | 138647       | 90941        | 163255       | 0.00                                                   |
| Alanine aminotransferase 1                        | P24298         | 282167       | 193224       | 397684       | 155702       | 185960       | 306813       | 0.00                                                   |
| Alcohol dehydrogenase 1A                          | P07327         | 887477       | 1154516      | 2469488      | 1299993      | 574326       | 1643925      | 0.16                                                   |
| Alcohol dehydrogenase 1B                          | P00325         | 306952       | 942507       | 2966067      | 1036885      | 870296       | 1308014      | 0.02                                                   |

Supplementary Table 1

## Relative protein quantitation (relative abundance units)

|                                              |                   | Subject<br>#003 | Subject<br>#004 | Subject<br>#005 | Subject<br>#007 | Subject<br>#009 | Subject<br>#011 | Protein<br>Relative<br>Abundance vs<br>Fibrosis Score<br>(r <sup>2</sup> ) |
|----------------------------------------------|-------------------|-----------------|-----------------|-----------------|-----------------|-----------------|-----------------|----------------------------------------------------------------------------|
|                                              | Fibrosis<br>Score | 3               | 0               | 2               | 1               | 4               | 0               |                                                                            |
| Alcohol dehydrogenase 1C                     | P00326            | 461947          | 848326          | 77460           | 305137          | 232659          | 778711          | 0.47                                                                       |
| Alcohol dehydrogenase 4                      | P08319            | 355682          | 481488          | 1993403         | 885862          | 407368          | 709220          | 0.01                                                                       |
| Alcohol dehydrogenase 6                      | P28332            | 110775          | 411190          | 816238          | 495402          | 136221          | 225894          | 0.09                                                                       |
| Alcohol dehydrogenase class-3                | P11766            | 359819          | 515757          | 933728          | 442465          | 477505          | 107390          | 0.07                                                                       |
| Aldehyde dehydrogenase X, mitochondrial      | P30837            | 379957          | 212768          | 143706          | 168285          | 115559          | 124732          | 0.03                                                                       |
| Aldehyde dehydrogenase, mitochondrial        | P05091            | 400538          | 651008          | 1078053         | 608503          | 172180          | 628166          | 0.25                                                                       |
| Aldehyde oxidase                             | Q06278            | 384453          | 384815          | 428579          | 535264          | 296361          | 259226          | 0.01                                                                       |
| Aldo-keto reductase family 1 member C1       | Q04828            | 322047          | 1421063         | 532538          | 447862          | 195031          | 210105          | 0.27                                                                       |
| Aldo-keto reductase family 1 member C2       | P52895            | 82753           | 127802          | 61249           | 66653           | 57674           | 158821          | 0.58                                                                       |
| Aldo-keto reductase family 1 member C4       | P17516            | 291163          | 266324          | 535466          | 312129          | 420554          | 243378          | 0.29                                                                       |
| Alpha-1-antitrypsin                          | P01009            | 203992          | 296709          | 124437          | 99192           | 471559          | 105440          | 0.32                                                                       |
| Alpha-2-macroglobulin                        | P01023            | 166236          | 178817          | 210252          | 278319          | 313038          | 125897          | 0.32                                                                       |
| Alpha-actinin-1                              | P12814            | 177938          | 253328          | 214395          | 209370          | 234626          | 259144          | 0.31                                                                       |
| Alpha-actinin-2                              | P35609            | 151998          | 95526           | 105238          | 100487          | 220393          | 613087          | 0.09                                                                       |
| Alpha-actinin-4                              | O43707            | 312283          | 334929          | 256249          | 210717          | 380638          | 332760          | 0.07                                                                       |
| Alpha-aminoadipic semialdehyde dehydrogenase | P49419            | 109513          | 194235          | 433547          | 292611          | 110217          | 251378          | 0.15                                                                       |
| Alpha-enolase                                | P06733            | 362304          | 357972          | 425754          | 329380          | 442979          | 587080          | 0.03                                                                       |
| Amine oxidase [flavin-containing] A          | P21397            | 213010          | 208951          | 362264          | 394705          | 206918          | 197694          | 0.01                                                                       |
| Amine oxidase [flavin-containing] B          | P27338            | 384404          | 409125          | 407970          | 404062          | 153693          | 214525          | 0.10                                                                       |
| Aminoacylase-1                               | Q03154            | 391277          | 291920          | 326906          | 216752          | 370988          | 279144          | 0.58                                                                       |
| Annexin A2                                   | P07355            | 286098          | 166004          | 180235          | 135674          | 792396          | 178227          | 0.63                                                                       |
| Annexin A4                                   | P09525            | 212014          | 189509          | 226986          | 216985          | 401858          | 253651          | 0.43                                                                       |
| Annexin A5                                   | P08758            | 267192          | 198464          | 45294           | 213419          | 414263          | 177124          | 0.33                                                                       |
| Annexin A6                                   | P08133            | 410410          | 334099          | 314023          | 355178          | 362150          | 376798          | 0.08                                                                       |

Supplementary Table 1

## Relative protein quantitation (relative abundance units)

|                                                                              |                   | Subject<br>#003 | Subject<br>#004 | Subject<br>#005 | Subject<br>#007 | Subject<br>#009 | Subject<br>#011 | Protein<br>Relative<br>Abundance vs<br>Fibrosis Score<br>(r <sup>2</sup> ) |
|------------------------------------------------------------------------------|-------------------|-----------------|-----------------|-----------------|-----------------|-----------------|-----------------|----------------------------------------------------------------------------|
|                                                                              | Fibrosis<br>Score | 3               | 0               | 2               | 1               | 4               | 0               |                                                                            |
| Apolipoprotein A-I                                                           | P02647            | 246216          | 365228          | 165620          | 204408          | 404322          | 117578          | 0.18                                                                       |
| Apoptosis-inducing factor 1, mitochondrial                                   | O95831            | 210859          | 253312          | 301006          | 263138          | 146035          | 206075          | 0.24                                                                       |
| Arginase-1                                                                   | P05089            | 497808          | 500998          | 610382          | 526215          | 258129          | 385222          | 0.13                                                                       |
| Argininosuccinate lyase                                                      | P04424            | 307292          | 318335          | 282359          | 454260          | 220608          | 290972          | 0.22                                                                       |
| Argininosuccinate synthase                                                   | P00966            | 433991          | 287147          | 1055696         | 537575          | 538243          | 905545          | 0.00                                                                       |
| Arylacetamide deacetylase                                                    | P22760            | 138106          | 340196          | 126356          | 92496           | 140320          | 179245          | 0.27                                                                       |
| Aspartate aminotransferase, cytoplasmic                                      | P17174            | 410791          | 650264          | 557384          | 441305          | 212504          | 297995          | 0.24                                                                       |
| Aspartate aminotransferase, mitochondrial                                    | P00505            | 720319          | 1090283         | 761722          | 1232983         | 490247          | 1014776         | 0.77                                                                       |
| ATP synthase subunit alpha, mitochondrial                                    | P25705            | 746211          | 817706          | 423800          | 560193          | 354951          | 899795          | 0.50                                                                       |
| ATP synthase subunit b, mitochondrial                                        | P24539            | 256631          | 289302          | 340743          | 307720          | 214527          | 487545          | 0.50                                                                       |
| ATP synthase subunit beta, mitochondrial                                     | P06576            | 468671          | 534628          | 485517          | 424796          | 294116          | 665903          | 0.66                                                                       |
| ATP synthase subunit delta, mitochondrial                                    | P30049            | 137597          | 74809           | 100390          | 124564          | 103436          | 289559          | 0.14                                                                       |
| ATP synthase subunit O, mitochondrial                                        | P48047            | 394723          | 559874          | 421407          | 527444          | 315991          | 561667          | 0.98                                                                       |
| ATP-binding cassette sub-family D member 3                                   | P28288            | 187378          | 101982          | 92925           | 195004          | 125141          | 163522          | 0.00                                                                       |
| Basement membrane-specific heparan sulfate proteoglycan core protein         | P98160            | 88374           | 68479           | 76187           | 167590          | 111062          | 52982           | 0.07                                                                       |
| Beta-enolase                                                                 | P13929            | 355426          | 933086          | 336765          | 315625          | 772491          | 556946          | 0.02                                                                       |
| Betaine--homocysteine S-methyltransferase 1                                  | Q93088            | 532751          | 732260          | 1214333         | 789318          | 317889          | 988298          | 0.35                                                                       |
| Betaine--homocysteine S-methyltransferase 2                                  | Q9H2M3            | 152215          | 408705          | 225006          | 256654          | 123515          | 249318          | 0.74                                                                       |
| Bifunctional ATP-dependent dihydroxyacetone kinase/FAD-AMP lyase (cyclizing) | Q3LXA3            | 393692          | 442637          | 281790          | 371288          | 180997          | 347845          | 0.48                                                                       |
| Bile acid-CoA:amino acid N-acyltransferase                                   | Q14032            | 658194          | 538211          | 423559          | 210618          | 263570          | 470954          | 0.02                                                                       |

Supplementary Table 1

## Relative protein quantitation (relative abundance units)

|                                                          |                   | Subject<br>#003 | Subject<br>#004 | Subject<br>#005 | Subject<br>#007 | Subject<br>#009 | Subject<br>#011 | Protein<br>Relative<br>Abundance vs<br>Fibrosis Score<br>(r <sup>2</sup> ) |
|----------------------------------------------------------|-------------------|-----------------|-----------------|-----------------|-----------------|-----------------|-----------------|----------------------------------------------------------------------------|
|                                                          | Fibrosis<br>Score | 3               | 0               | 2               | 1               | 4               | 0               |                                                                            |
| Bile acyl-CoA synthetase                                 | Q9Y2P5            | 186923          | 246297          | 359361          | 356951          | 133219          | 225478          | 0.21                                                                       |
| Bile salt sulfotransferase                               | Q06520            | 216896          | 850168          | 407157          | 319380          | 238205          | 581976          | 0.67                                                                       |
| C-1-tetrahydrofolate synthase, cytoplasmic               | P11586            | 464795          | 471396          | 426200          | 569801          | 495903          | 260898          | 0.14                                                                       |
| Calcium-binding mitochondrial carrier protein            |                   |                 |                 |                 |                 |                 |                 |                                                                            |
| Aralar2                                                  | Q9UJS0            | 264164          | 343665          | 305605          | 211060          | 159599          | 221362          | 0.22                                                                       |
| Calmodulin                                               | P62158            | 956523          | 301884          | 567340          | 246516          | 540482          | 1149017         | 0.00                                                                       |
| Calnexin                                                 | P27824            | 610268          | 479192          | 438074          | 319380          | 147362          | 431878          | 0.11                                                                       |
| Calreticulin                                             | P27797            | 513011          | 382900          | 459027          | 357036          | 413608          | 343090          | 0.45                                                                       |
| Carbamoyl-phosphate synthase [ammonia],<br>mitochondrial | P31327            | 608634          | 837655          | 1575960         | 1184389         | 378147          | 1128944         | 0.27                                                                       |
| Carbonic anhydrase 1                                     | P00915            | 320191          | 307672          | 243940          | 123773          | 354229          | 142137          | 0.41                                                                       |
| Carbonic anhydrase 2                                     | P00918            | 273366          | 321512          | 518038          | 211920          | 287929          | 336990          | 0.00                                                                       |
| Carbonyl reductase [NADPH] 1                             | P16152            | 302504          | 706811          | 352507          | 313125          | 384308          | 562570          | 0.47                                                                       |
| Catalase                                                 | P04040            | 406353          | 416907          | 407259          | 469451          | 254051          | 457036          | 0.63                                                                       |
| Cathepsin D                                              | P07339            | 557319          | 365235          | 266682          | 350858          | 495107          | 337625          | 0.43                                                                       |
| Clathrin heavy chain 1                                   | Q00610            | 150323          | 145481          | 123770          | 198036          | 122506          | 211249          | 0.42                                                                       |
| Cofilin-1                                                | P23528            | 335709          | 273318          | 141074          | 340983          | 448902          | 396019          | 0.05                                                                       |
| Collagen alpha-1(I) chain                                | P02452            | 252164          | 155662          | 161999          | 207446          | 334606          | 246411          | 0.44                                                                       |
| Collagen alpha-1(III) chain                              | P02461            | 280410          | 189953          | 194664          | 193896          | 371597          | 177778          | 0.81                                                                       |
| Collagen alpha-1(IV) chain                               | P02462            | 184860          | 138707          | 149828          | 168323          | 356365          | 174017          | 0.56                                                                       |
| Collagen alpha-1(VI) chain                               | P12109            | 317392          | 238331          | 254398          | 211815          | 551534          | 244783          | 0.67                                                                       |
| Collagen alpha-1(XIV) chain                              | Q05707            | 196106          | 115734          | 135591          | 131696          | 428986          | 220098          | 0.48                                                                       |
| Collagen alpha-2(I) chain                                | P08123            | 366521          | 227369          | 319017          | 308505          | 576338          | 315992          | 0.73                                                                       |
| Collagen alpha-2(VI) chain                               | P12110            | 255668          | 194062          | 209355          | 301792          | 269713          | 144362          | 0.34                                                                       |
| Collagen alpha-3(VI) chain                               | P12111            | 274293          | 188941          | 211864          | 219458          | 460782          | 217783          | 0.69                                                                       |

Supplementary Table 1

## Relative protein quantitation (relative abundance units)

|                                                               |                   | Subject<br>#003 | Subject<br>#004 | Subject<br>#005 | Subject<br>#007 | Subject<br>#009 | Subject<br>#011 | Protein<br>Relative<br>Abundance vs<br>Fibrosis Score<br>(r <sup>2</sup> ) |
|---------------------------------------------------------------|-------------------|-----------------|-----------------|-----------------|-----------------|-----------------|-----------------|----------------------------------------------------------------------------|
|                                                               | Fibrosis<br>Score | 3               | 0               | 2               | 1               | 4               | 0               |                                                                            |
| Complement C3                                                 | P01024            | 134495          | 187505          | 128316          | 167484          | 213527          | 117158          | 0.11                                                                       |
| Creatine kinase M-type                                        | P06732            | 488670          | 67986           | 109996          | 272188          | 434902          | 2066700         | 0.11                                                                       |
| Cystathionine gamma-lyase                                     | P32929            | 144734          | 124180          | 368802          | 215285          | 170095          | 320540          | 0.04                                                                       |
| Cytochrome b5                                                 | P00167            | 1284056         | 3223041         | 2191395         | 2519420         | 770280          | 3053207         | 0.98                                                                       |
| Cytochrome b-c1 complex subunit 2, mitochondrial              | P22695            | 233557          | 146989          | 175112          | 367130          | 472931          | 220582          | 0.36                                                                       |
| Cytochrome c oxidase subunit 2                                | P00403            | 178913          | 297586          | 252800          | 419380          | 157805          | 445196          | 0.71                                                                       |
| Cytochrome c oxidase subunit 5A, mitochondrial                | P20674            | 365566          | 381588          | 466471          | 374907          | 217881          | 352591          | 0.24                                                                       |
| Cytochrome P450 2A6                                           | P11509            | 292046          | 277246          | 245900          | 421409          | 117824          | 142911          | 0.07                                                                       |
| Cytochrome P450 2C8                                           | P10632            | 423184          | 538536          | 469606          | 230266          | 159437          | 531918          | 0.42                                                                       |
| Cytochrome P450 2C9                                           | P11712            | 529717          | 420198          | 246868          | 255992          | 73289           | 393433          | 0.19                                                                       |
| Cytochrome P450 2E1                                           | P05181            | 174529          | 265211          | 419962          | 327835          | 234160          | 129019          | 0.00                                                                       |
| Cytochrome P450 3A4                                           | P08684            | 96634           | 183501          | 147762          | 734315          | 126016          | 551762          | 0.32                                                                       |
| Cytoplasmic aconitate hydratase                               | P21399            | 325924          | 198412          | 339595          | 277914          | 177651          | 198565          | 0.04                                                                       |
| Cytosol aminopeptidase                                        | P28838            | 181415          | 365615          | 265500          | 173990          | 262172          | 238265          | 0.10                                                                       |
| Cytosolic 10-formyltetrahydrofolate dehydrogenase             | O75891            | 142417          | 240402          | 390816          | 239555          | 133561          | 181877          | 0.09                                                                       |
| Cytosolic non-specific dipeptidase                            | Q96KP4            | 212149          | 192455          | 276502          | 212721          | 288105          | 224476          | 0.44                                                                       |
| D-beta-hydroxybutyrate dehydrogenase,<br>mitochondrial        | Q02338            | 348290          | 623219          | 509889          | 776160          | 182364          | 223237          | 0.21                                                                       |
| D-dopachrome decarboxylase                                    | P30046            | 211333          | 528448          | 494189          | 585031          | 316231          | 842264          | 0.69                                                                       |
| D-dopachrome decarboxylase-like protein                       | A6NHG4            | 378851          | 1409516         | 759446          | 401136          | 503371          | 1089923         | 0.54                                                                       |
| Delta(3,5)-Delta(2,4)-dienoyl-CoA isomerase,<br>mitochondrial | Q13011            | 387978          | 426735          | 106717          | 349972          | 243077          | 397193          | 0.24                                                                       |

Supplementary Table 1

## Relative protein quantitation (relative abundance units)

|                                                                             |                   | Subject<br>#003 | Subject<br>#004 | Subject<br>#005 | Subject<br>#007 | Subject<br>#009 | Subject<br>#011 | Protein<br>Relative<br>Abundance vs<br>Fibrosis Score<br>(r <sup>2</sup> ) |
|-----------------------------------------------------------------------------|-------------------|-----------------|-----------------|-----------------|-----------------|-----------------|-----------------|----------------------------------------------------------------------------|
|                                                                             | Fibrosis<br>Score | 3               | 0               | 2               | 1               | 4               | 0               |                                                                            |
| Delta-1-pyrroline-5-carboxylate dehydrogenase,<br>mitochondrial             | P30038            | 331796          | 506202          | 452505          | 586798          | 232308          | 379346          | 0.50                                                                       |
| Desmin                                                                      | P17661            | 757962          | 179426          | 222131          | 344236          | 693997          | 334589          | 0.66                                                                       |
| Dihydropyrimidinase                                                         | Q14117            | 186944          | 457016          | 319893          | 258023          | 165363          | 501282          | 0.82                                                                       |
| Dimethylaniline monooxygenase [N-oxide-forming]<br>3                        | P31513            | 394972          | 303569          | 824179          | 461530          | 367279          | 176452          | 0.09                                                                       |
| Dimethylglycine dehydrogenase, mitochondrial                                | Q9UI17            | 71098           | 204884          | 310757          | 166799          | 108610          | 172464          | 0.18                                                                       |
| Dolichyl-diphosphooligosaccharide--protein<br>glycosyltransferase subunit 1 | P04843            | 449854          | 352575          | 344242          | 418752          | 167056          | 438193          | 0.33                                                                       |
| Dolichyl-diphosphooligosaccharide--protein<br>glycosyltransferase subunit 2 | P04844            | 172761          | 201617          | 267661          | 304520          | 155656          | 301266          | 0.45                                                                       |
| Electron transfer flavoprotein subunit alpha,<br>mitochondrial              | P13804            | 386707          | 290257          | 275701          | 266415          | 210552          | 319917          | 0.04                                                                       |
| Electron transfer flavoprotein subunit beta                                 | P38117            | 494636          | 694544          | 453915          | 649042          | 695915          | 580900          | 0.02                                                                       |
| Electron transfer flavoprotein-ubiquinone<br>oxidoreductase, mitochondrial  | Q16134            | 141251          | 263238          | 254499          | 287683          | 136808          | 125776          | 0.17                                                                       |
| Elongation factor 1-alpha 1                                                 | P68104            | 525964          | 340486          | 584660          | 398721          | 313436          | 248039          | 0.13                                                                       |
| Elongation factor 2                                                         | P13639            | 250831          | 283020          | 330321          | 254603          | 131018          | 81463           | 0.00                                                                       |
| Elongation factor Tu, mitochondrial                                         | P49411            | 137925          | 154500          | 328492          | 379418          | 147467          | 455832          | 0.31                                                                       |
| Endoplasmic                                                                 | P14625            | 344267          | 369855          | 353882          | 329889          | 248518          | 365316          | 0.62                                                                       |
| Enoyl-CoA delta isomerase 1, mitochondrial                                  | P42126            | 195334          | 232074          | 274642          | 118133          | 109845          | 191030          | 0.11                                                                       |
| Enoyl-CoA hydratase domain-containing protein 2,<br>mitochondrial           | Q86YB7            | 204058          | 415907          | 401002          | 278417          | 141470          | 161856          | 0.18                                                                       |
| Enoyl-CoA hydratase, mitochondrial                                          | P30084            | 610858          | 1112143         | 690096          | 610845          | 326055          | 473033          | 0.33                                                                       |

Supplementary Table 1

## Relative protein quantitation (relative abundance units)

|                                          |                   | Subject<br>#003 | Subject<br>#004 | Subject<br>#005 | Subject<br>#007 | Subject<br>#009 | Subject<br>#011 | Protein<br>Relative<br>Abundance vs<br>Fibrosis Score<br>(r <sup>2</sup> ) |
|------------------------------------------|-------------------|-----------------|-----------------|-----------------|-----------------|-----------------|-----------------|----------------------------------------------------------------------------|
|                                          | Fibrosis<br>Score | 3               | 0               | 2               | 1               | 4               | 0               |                                                                            |
| Epoxide hydrolase 1                      | P07099            | 654135          | 771135          | 704578          | 1275579         | 383199          | 555140          | 0.18                                                                       |
| Epoxide hydrolase 2                      | P34913            | 243899          | 243298          | 437321          | 283429          | 162092          | 172393          | 0.00                                                                       |
| Fatty acid synthase                      | P49327            | 235503          | 244420          | 196319          | 138753          | 161299          | 183450          | 0.02                                                                       |
| Fatty acid-binding protein, liver        | P07148            | 1254152         | 916977          | 1131374         | 672184          | 392193          | 1481518         | 0.21                                                                       |
| Ferritin light chain                     | P02792            | 527382          | 848477          | 278869          | 771310          | 189208          | 1188323         | 0.76                                                                       |
| Fibrinogen alpha chain                   | P02671            | 291943          | 148925          | 175322          | 151221          | 125799          | 173557          | 0.05                                                                       |
| Fibronectin                              | P02751            | 254900          | 272894          | 107370          | 297530          | 224282          | 140261          | 0.00                                                                       |
| Filamin-A                                | P21333            | 85578           | 147265          | 64499           | 217833          | 445665          | 109662          | 0.27                                                                       |
| Flavin reductase (NADPH)                 | P30043            | 227722          | 372543          | 465491          | 335254          | 236524          | 331588          | 0.28                                                                       |
| Formimidoyltransferase-cyclodeaminase    | O95954            | 436453          | 349652          | 688029          | 518837          | 243495          | 388085          | 0.02                                                                       |
| Fructose-1,6-bisphosphatase 1            | P09467            | 711237          | 604075          | 711906          | 590495          | 258085          | 931007          | 0.42                                                                       |
| Fructose-1,6-bisphosphatase isozyme 2    | O00757            | 639445          | 893679          | 436424          | 433101          | 172263          | 711626          | 0.57                                                                       |
| Fructose-bisphosphate aldolase A         | P04075            | 186247          | 67871           | 265448          | 75813           | 176687          | 445526          | 0.02                                                                       |
| Fructose-bisphosphate aldolase B         | P05062            | 586162          | 771278          | 1180884         | 756997          | 379776          | 1364757         | 0.44                                                                       |
| Fumarate hydratase, mitochondrial        | P07954            | 216459          | 169188          | 205354          | 182483          | 217047          | 270764          | 0.00                                                                       |
| Fumarylacetoacetase                      | P16930            | 393437          | 215734          | 319463          | 317627          | 211474          | 212186          | 0.10                                                                       |
| Gamma-glutamyltransferase 5              | P36269            | 185168          | 50131           | 141927          | 86105           | 377007          | 46163           | 0.88                                                                       |
| Gelsolin                                 | P06396            | 308953          | 551634          | 517407          | 450924          | 415235          | 480051          | 0.44                                                                       |
| Glucose-6-phosphate isomerase            | P06744            | 383323          | 275377          | 227165          | 202608          | 331686          | 350852          | 0.10                                                                       |
| Glutamate dehydrogenase 1, mitochondrial | P00367            | 270121          | 568343          | 613558          | 461862          | 271996          | 563922          | 0.63                                                                       |
| Glutathione S-transferase A1             | P08263            | 574442          | 632373          | 867713          | 1005053         | 366771          | 498836          | 0.11                                                                       |
| Glutathione S-transferase kappa 1        | Q9Y2Q3            | 304799          | 353209          | 273203          | 203370          | 170263          | 289950          | 0.32                                                                       |
| Glutathione S-transferase Mu 1           | P09488            | 279812          | 228291          | 552558          | 368656          | 350683          | 764693          | 0.10                                                                       |
| Glutathione S-transferase Mu 4           | Q03013            | 108458          | 61081           | 324203          | 92904           | 84462           | 72348           | 0.04                                                                       |
| Glutathione S-transferase omega-1        | P78417            | 548357          | 642841          | 170320          | 426602          | 169090          | 381940          | 0.26                                                                       |

Supplementary Table 1

## Relative protein quantitation (relative abundance units)

|                                                           |                   | Subject<br>#003 | Subject<br>#004 | Subject<br>#005 | Subject<br>#007 | Subject<br>#009 | Subject<br>#011 | Protein<br>Relative<br>Abundance vs<br>Fibrosis Score<br>(r <sup>2</sup> ) |
|-----------------------------------------------------------|-------------------|-----------------|-----------------|-----------------|-----------------|-----------------|-----------------|----------------------------------------------------------------------------|
|                                                           | Fibrosis<br>Score | 3               | 0               | 2               | 1               | 4               | 0               |                                                                            |
| Glyceraldehyde-3-phosphate dehydrogenase                  | P04406            | 1380644         | 1170337         | 894214          | 783813          | 1177895         | 1335494         | 0.01                                                                       |
| Glycine amidinotransferase, mitochondrial                 | P50440            | 184289          | 338702          | 279142          | 410511          | 185126          | 333337          | 0.71                                                                       |
| Glycine dehydrogenase [decarboxylating],<br>mitochondrial | P23378            | 81127           | 167082          | 380357          | 123061          | 328092          | 161041          | 0.15                                                                       |
| Glycogen debranching enzyme                               | P35573            | 98264           | 265612          | 289618          | 178854          | 174994          | 136565          | 0.06                                                                       |
| Glycogen phosphorylase, liver form                        | P06737            | 333794          | 211310          | 380734          | 281967          | 151228          | 241261          | 0.00                                                                       |
| Glyoxylate reductase/hydroxypyruvate reductase            | Q9UBQ7            | 510920          | 533438          | 821990          | 340740          | 205683          | 460226          | 0.07                                                                       |
| GTP:AMP phosphotransferase, mitochondrial                 | Q9UIJ7            | 74992           | 327973          | 99384           | 131016          | 93293           | 124175          | 0.41                                                                       |
| Heat shock 70 kDa protein 1A/1B                           | P08107            | 150358          | 155446          | 238416          | 170306          | 196951          | 180583          | 0.06                                                                       |
| Heat shock cognate 71 kDa protein                         | P11142            | 438347          | 414764          | 220680          | 432117          | 529689          | 225657          | 0.28                                                                       |
| Heat shock protein beta-1                                 | P04792            | 492826          | 359815          | 267765          | 371582          | 964182          | 322955          | 0.59                                                                       |
| Heat shock-related 70 kDa protein 2                       | P54652            | 556148          | 529909          | 156992          | 313833          | 335676          | 339085          | 0.00                                                                       |
| Hemoglobin subunit alpha                                  | P69905            | 2308345         | 2237914         | 2293501         | 1540541         | 2157804         | 795200          | 0.32                                                                       |
| Hemoglobin subunit beta                                   | P68871            | 4949829         | 8349896         | 4634742         | 6511228         | 9521177         | 840942          | 0.18                                                                       |
| Hemoglobin subunit delta                                  | P02042            | 416087          | 524363          | 323881          | 352702          | 568069          | 397942          | 0.08                                                                       |
| Heterogeneous nuclear ribonucleoprotein K                 | P61978            | 309056          | 332536          | 279481          | 132729          | 298335          | 324611          | 0.00                                                                       |
| Histone H1.1                                              | Q02539            | 132381          | 69571           | 111903          | 336336          | 391912          | 264433          | 0.10                                                                       |
| Histone H1.2                                              | P16403            | 909240          | 83870           | 356725          | 348145          | 1036080         | 267101          | 0.89                                                                       |
| Histone H2A type 1-A                                      | Q96QV6            | 316017          | 273418          | 349390          | 353864          | 356543          | 238497          | 0.49                                                                       |
| Histone H2A type 1-B/E                                    | P04908            | 4238046         | 5868930         | 8319763         | 6297621         | 9881736         | 4136551         | 0.33                                                                       |
| Histone H2A type 2-A                                      | Q6FI13            | 425921          | 566413          | 348389          | 855773          | 570557          | 245626          | 0.00                                                                       |
| Histone H2B type 1-A                                      | Q96A08            | 1182246         | 7420451         | 678758          | 1451361         | 2249162         | 971255          | 0.14                                                                       |
| Histone H2B type 1-B                                      | P33778            | 1205545         | 949097          | 829574          | 777608          | 1297973         | 603589          | 0.70                                                                       |
| Histone H3.1t                                             | Q16695            | 2835253         | 1783906         | 2136936         | 4131110         | 3543674         | 1981725         | 0.24                                                                       |

Supplementary Table 1

## Relative protein quantitation (relative abundance units)

|                                                            |                   | Subject<br>#003 | Subject<br>#004 | Subject<br>#005 | Subject<br>#007 | Subject<br>#009 | Subject<br>#011 | Protein<br>Relative<br>Abundance vs<br>Fibrosis Score<br>(r <sup>2</sup> ) |
|------------------------------------------------------------|-------------------|-----------------|-----------------|-----------------|-----------------|-----------------|-----------------|----------------------------------------------------------------------------|
|                                                            | Fibrosis<br>Score | 3               | 0               | 2               | 1               | 4               | 0               |                                                                            |
| Histone H3.3                                               | P84243            | 1196440         | 1922767         | 4426890         | 2312006         | 3026133         | 2534041         | 0.02                                                                       |
| Histone H4                                                 | P62805            | 477754          | 511143          | 677167          | 626834          | 881923          | 589060          | 0.32                                                                       |
| HLA class I histocompatibility antigen, A-1 alpha chain    | P30443            | 385334          | 483310          | 81563           | 295295          | 169066          | 246140          | 0.16                                                                       |
| Homogentisate 1,2-dioxygenase                              | Q93099            | 125931          | 151050          | 150399          | 296300          | 101370          | 194141          | 0.32                                                                       |
| Hydroxyacid oxidase 1                                      | Q9UJM8            | 358219          | 463199          | 560663          | 443370          | 118680          | 499258          | 0.56                                                                       |
| Hydroxyacyl-coenzyme A dehydrogenase, mitochondrial        | Q16836            | 436489          | 663737          | 708468          | 347019          | 263779          | 660063          | 0.42                                                                       |
| Hydroxymethylglutaryl-CoA synthase, cytoplasmic            | Q01581            | 561899          | 807112          | 1309498         | 948830          | 951583          | 1249507         | 0.08                                                                       |
| Hydroxymethylglutaryl-CoA synthase, mitochondrial          | P54868            | 889906          | 805901          | 921317          | 1009559         | 380966          | 816608          | 0.31                                                                       |
| Ig gamma-1 chain C region                                  | P01857            | 594949          | 650478          | 366374          | 490347          | 2346445         | 333381          | 0.50                                                                       |
| Ig kappa chain C region                                    | P01834            | 907494          | 680757          | 229606          | 365814          | 2300271         | 418585          | 0.54                                                                       |
| Ig kappa chain V-IV region Len                             | P01625            | 528091          | 652585          | 860040          | 455142          | 608480          | 1030181         | 0.16                                                                       |
| Ig lambda-2 chain C regions                                | P0CG05            | 250485          | 334400          | 93896           | 160120          | 1023329         | 131636          | 0.43                                                                       |
| Immunoglobulin lambda-like polypeptide 5                   | B9A064            | 518113          | 557161          | 147091          | 205781          | 1443485         | 88096           | 0.49                                                                       |
| Isochorismatase domain-containing protein 2, mitochondrial | Q96AB3            | 435788          | 444997          | 755216          | 319952          | 245420          | 661910          | 0.17                                                                       |
| Isocitrate dehydrogenase [NADP] cytoplasmic                | O75874            | 187044          | 390294          | 277406          | 253201          | 163283          | 345636          | 0.87                                                                       |
| Isocitrate dehydrogenase [NADP], mitochondrial             | P48735            | 188002          | 221553          | 248502          | 333080          | 234604          | 259900          | 0.13                                                                       |
| Keratin, type I cytoskeletal 10                            | P13645            | 173860          | 52025           | 128733          | 282718          | 127157          | 103590          | 0.04                                                                       |
| Keratin, type I cytoskeletal 18                            | P05783            | 320065          | 362677          | 349298          | 321485          | 478609          | 260745          | 0.47                                                                       |
| Keratin, type II cytoskeletal 1                            | P04264            | 263954          | 164678          | 180364          | 290400          | 272544          | 297854          | 0.03                                                                       |

Supplementary Table 1

## Relative protein quantitation (relative abundance units)

|                                                                         |                   | Subject<br>#003 | Subject<br>#004 | Subject<br>#005 | Subject<br>#007 | Subject<br>#009 | Subject<br>#011 | Protein<br>Relative<br>Abundance vs<br>Fibrosis Score<br>(r <sup>2</sup> ) |
|-------------------------------------------------------------------------|-------------------|-----------------|-----------------|-----------------|-----------------|-----------------|-----------------|----------------------------------------------------------------------------|
|                                                                         | Fibrosis<br>Score | 3               | 0               | 2               | 1               | 4               | 0               |                                                                            |
| Keratin, type II cytoskeletal 8                                         | P05787            | 517904          | 379924          | 469837          | 730100          | 577197          | 303211          | 0.21                                                                       |
| Liver carboxylesterase 1                                                | P23141            | 429223          | 432849          | 1028001         | 539610          | 309484          | 938683          | 0.17                                                                       |
| L-lactate dehydrogenase A chain                                         | P00338            | 266267          | 212986          | 76863           | 164478          | 168385          | 233458          | 0.02                                                                       |
| L-lactate dehydrogenase A-like 6B                                       | Q9BYZ2            | 91251           | 288189          | 275476          | 188865          | 76797           | 501948          | 0.67                                                                       |
| Long-chain-fatty-acid--CoA ligase 1                                     | P33121            | 319105          | 273868          | 394015          | 351436          | 222037          | 376745          | 0.21                                                                       |
| Lumican                                                                 | P51884            | 354276          | 92826           | 192504          | 225709          | 1364902         | 156756          | 0.64                                                                       |
| L-xylulose reductase                                                    | Q7Z4W1            | 209977          | 740233          | 1501310         | 785764          | 337978          | 933381          | 0.22                                                                       |
| Malate dehydrogenase, cytoplasmic                                       | P40925            | 369953          | 248507          | 276780          | 190024          | 310564          | 370791          | 0.07                                                                       |
| Malate dehydrogenase, mitochondrial                                     | P40926            | 674643          | 618158          | 397880          | 551420          | 412576          | 537876          | 0.11                                                                       |
| Medium-chain specific acyl-CoA dehydrogenase,<br>mitochondrial          | P11310            | 276816          | 362594          | 499274          | 547578          | 198888          | 307125          | 0.19                                                                       |
| Methylmalonate-semialdehyde dehydrogenase<br>[acylating], mitochondrial | Q02252            | 214009          | 170819          | 338829          | 178651          | 123409          | 211277          | 0.01                                                                       |
| Methyltransferase-like protein 7A                                       | Q9H8H3            | 213444          | 226944          | 291388          | 289517          | 94370           | 265287          | 0.47                                                                       |
| Microsomal glutathione S-transferase 1                                  | P10620            | 305488          | 473622          | 480316          | 462509          | 1168122         | 439901          | 0.34                                                                       |
| Microsomal triglyceride transfer protein large<br>subunit               | P55157            | 222743          | 237343          | 213733          | 218338          | 290980          | 136503          | 0.47                                                                       |
| Mitochondrial carrier homolog 2                                         | Q9Y6C9            | 141103          | 204958          | 266193          | 183383          | 160187          | 185162          | 0.12                                                                       |
| MOSC domain-containing protein 2, mitochondrial                         | Q969Z3            | 199251          | 248491          | 400764          | 133183          | 73470           | 267834          | 0.16                                                                       |
| Myomesin-2                                                              | P54296            | 122138          | 118515          | 62675           | 141653          | 166446          | 144186          | 0.02                                                                       |
| Myosin light polypeptide 6                                              | P60660            | 152264          | 109371          | 87981           | 148291          | 302028          | 176836          | 0.35                                                                       |
| Myosin-1                                                                | P12882            | 144139          | 148675          | 148866          | 126291          | 155043          | 853283          | 0.24                                                                       |
| Myosin-10                                                               | P35580            | 98278           | 188359          | 181543          | 193612          | 352707          | 110992          | 0.27                                                                       |
| Myosin-11                                                               | P35749            | 133129          | 173074          | 111117          | 150203          | 399902          | 112616          | 0.40                                                                       |

Supplementary Table 1

## Relative protein quantitation (relative abundance units)

|                                                                  |                   | Subject<br>#003 | Subject<br>#004 | Subject<br>#005 | Subject<br>#007 | Subject<br>#009 | Subject<br>#011 | Protein<br>Relative<br>Abundance vs<br>Fibrosis Score<br>(r <sup>2</sup> ) |
|------------------------------------------------------------------|-------------------|-----------------|-----------------|-----------------|-----------------|-----------------|-----------------|----------------------------------------------------------------------------|
|                                                                  | Fibrosis<br>Score | 3               | 0               | 2               | 1               | 4               | 0               |                                                                            |
| Myosin-2                                                         | Q9UKX2            | 319079          | 174041          | 182218          | 250918          | 120906          | 855377          | 0.25                                                                       |
| Myosin-6                                                         | P13533            | 175503          | 159372          | 152535          | 170318          | 205518          | 1896148         | 0.23                                                                       |
| Myosin-7                                                         | P12883            | 351774          | 67583           | 225849          | 159774          | 252354          | 1510719         | 0.13                                                                       |
| Myosin-9                                                         | P35579            | 185963          | 161920          | 126915          | 193885          | 304824          | 175106          | 0.40                                                                       |
| NAD kinase domain-containing protein 1                           | Q4G0N4            | 138704          | 219918          | 487972          | 364372          | 94097           | 104197          | 0.03                                                                       |
| NAD(P) transhydrogenase, mitochondrial                           | Q13423            | 330472          | 379933          | 146101          | 493332          | 55110           | 111821          | 0.14                                                                       |
| NADH dehydrogenase [ubiquinone] 1 alpha<br>subcomplex subunit 13 | Q9P0J0            | 228085          | 147347          | 34194           | 248503          | 94633           | 123338          | 0.01                                                                       |
| NADPH--cytochrome P450 reductase                                 | P16435            | 362088          | 339294          | 146749          | 314246          | 69072           | 121134          | 0.07                                                                       |
| Neuroblast differentiation-associated protein<br>AHNAK           | Q09666            | 243745          | 488741          | 156684          | 148911          | 324724          | 367484          | 0.13                                                                       |
| Neutral alpha-glucosidase AB                                     | Q14697            | 272318          | 243840          | 377729          | 334901          | 430848          | 228709          | 0.55                                                                       |
| Nucleophosmin                                                    | P06748            | 231399          | 222614          | 331409          | 202493          | 272443          | 272969          | 0.06                                                                       |
| Omega-amidase NIT2                                               | Q9NQR4            | 118702          | 212433          | 99852           | 216415          | 138769          | 264229          | 0.63                                                                       |
| Ornithine carbamoyltransferase, mitochondrial                    | P00480            | 314963          | 389361          | 341659          | 229499          | 261620          | 281347          | 0.07                                                                       |
| Peptidyl-prolyl cis-trans isomerase A                            | P62937            | 590983          | 747625          | 425151          | 674343          | 836311          | 602362          | 0.02                                                                       |
| Peptidyl-prolyl cis-trans isomerase B                            | P23284            | 170275          | 233169          | 171629          | 209192          | 159437          | 200157          | 0.79                                                                       |
| Peroxiredoxin-1                                                  | Q06830            | 1019936         | 666381          | 907221          | 735308          | 1107401         | 414530          | 0.88                                                                       |
| Peroxiredoxin-2                                                  | P32119            | 269282          | 255307          | 135964          | 334085          | 302123          | 177410          | 0.07                                                                       |
| Peroxiredoxin-4                                                  | Q13162            | 194149          | 445316          | 538884          | 150427          | 275059          | 363221          | 0.09                                                                       |
| Peroxiredoxin-5, mitochondrial                                   | P30044            | 183564          | 253353          | 374868          | 198616          | 135622          | 220625          | 0.12                                                                       |
| Peroxiredoxin-6                                                  | P30041            | 490177          | 563437          | 728707          | 523567          | 450652          | 540395          | 0.09                                                                       |
| Peroxisomal acyl-coenzyme A oxidase 2                            | Q99424            | 249716          | 349974          | 350169          | 476824          | 337004          | 533077          | 0.43                                                                       |
| Peroxisomal bifunctional enzyme                                  | Q08426            | 430661          | 446604          | 469253          | 465354          | 274039          | 298704          | 0.07                                                                       |

Supplementary Table 1

## Relative protein quantitation (relative abundance units)

|                                                                       |                   | Subject<br>#003 | Subject<br>#004 | Subject<br>#005 | Subject<br>#007 | Subject<br>#009 | Subject<br>#011 | Protein<br>Relative<br>Abundance vs<br>Fibrosis Score<br>(r <sup>2</sup> ) |
|-----------------------------------------------------------------------|-------------------|-----------------|-----------------|-----------------|-----------------|-----------------|-----------------|----------------------------------------------------------------------------|
|                                                                       | Fibrosis<br>Score | 3               | 0               | 2               | 1               | 4               | 0               |                                                                            |
| Peroxisomal multifunctional enzyme type 2                             | P51659            | 608784          | 507417          | 576479          | 729150          | 487969          | 648049          | 0.13                                                                       |
| Peroxisomal sarcosine oxidase                                         | Q9P0Z9            | 383050          | 235906          | 286224          | 311947          | 167149          | 287058          | 0.02                                                                       |
| Phosphate carrier protein, mitochondrial                              | Q00325            | 252977          | 288114          | 225932          | 416625          | 184851          | 390159          | 0.56                                                                       |
| Phosphatidylethanolamine-binding protein 1                            | P30086            | 767962          | 1131180         | 1553432         | 756538          | 589811          | 1454077         | 0.34                                                                       |
| Phosphoenolpyruvate carboxykinase [GTP],<br>mitochondrial             | Q16822            | 378560          | 467212          | 887217          | 599282          | 244319          | 495337          | 0.13                                                                       |
| Phosphoenolpyruvate carboxykinase, cytosolic<br>[GTP]                 | P35558            | 457494          | 784118          | 918233          | 672141          | 158033          | 746207          | 0.59                                                                       |
| Phosphoglucomutase-1                                                  | P36871            | 280233          | 375444          | 711595          | 194380          | 249171          | 422267          | 0.03                                                                       |
| Phosphoglycerate kinase 1                                             | P00558            | 343212          | 425896          | 371534          | 342606          | 525533          | 315115          | 0.30                                                                       |
| Phosphoglycerate mutase 1                                             | P18669            | 312973          | 324817          | 291884          | 221765          | 454533          | 315200          | 0.34                                                                       |
| Phospholysine phosphohistidine inorganic<br>pyrophosphate phosphatase | Q9H008            | 138974          | 147638          | 170379          | 104926          | 127039          | 149614          | 0.02                                                                       |
| Plastin-2                                                             | P13796            | 385682          | 116196          | 227873          | 174940          | 490320          | 357454          | 0.51                                                                       |
| Polypyrimidine tract-binding protein 1                                | P26599            | 72843           | 144719          | 360994          | 410094          | 169894          | 153720          | 0.02                                                                       |
| Prelamin-A/C                                                          | P02545            | 188447          | 271218          | 235550          | 318499          | 388907          | 265579          | 0.05                                                                       |
| Profilin-1                                                            | P07737            | 1210380         | 793256          | 928575          | 866264          | 1501847         | 988045          | 0.76                                                                       |
| Prohibitin                                                            | P35232            | 241752          | 418077          | 340922          | 285458          | 241614          | 232957          | 0.21                                                                       |
| Prohibitin-2                                                          | Q99623            | 373784          | 603661          | 418245          | 434138          | 231929          | 396791          | 0.64                                                                       |
| Prolargin                                                             | P51888            | 156338          | 208072          | 527103          | 189125          | 640116          | 128846          | 0.45                                                                       |
| Prostaglandin reductase 1                                             | Q14914            | 458383          | 533179          | 300703          | 393300          | 331768          | 299576          | 0.05                                                                       |
| Proteasome activator complex subunit 1                                | Q06323            | 248847          | 278340          | 309086          | 165819          | 256312          | 285677          | 0.00                                                                       |
| Proteasome activator complex subunit 2                                | Q9UL46            | 418562          | 237898          | 98706           | 195806          | 107514          | 255705          | 0.01                                                                       |
| Proteasome subunit alpha type-2                                       | P25787            | 326604          | 217234          | 249857          | 213388          | 196737          | 226574          | 0.06                                                                       |
| Protein disulfide-isomerase                                           | P07237            | 856864          | 875122          | 1047673         | 762905          | 471495          | 900313          | 0.31                                                                       |

Supplementary Table 1

## Relative protein quantitation (relative abundance units)

|                                               |                   | Subject<br>#003 | Subject<br>#004 | Subject<br>#005 | Subject<br>#007 | Subject<br>#009 | Subject<br>#011 | Protein<br>Relative<br>Abundance vs<br>Fibrosis Score<br>(r <sup>2</sup> ) |
|-----------------------------------------------|-------------------|-----------------|-----------------|-----------------|-----------------|-----------------|-----------------|----------------------------------------------------------------------------|
|                                               | Fibrosis<br>Score | 3               | 0               | 2               | 1               | 4               | 0               |                                                                            |
| Protein disulfide-isomerase A3                | P30101            | 363316          | 306944          | 264379          | 449013          | 190429          | 338278          | 0.25                                                                       |
| Protein disulfide-isomerase A4                | P13667            | 339980          | 405192          | 396269          | 305310          | 178474          | 161294          | 0.03                                                                       |
| Protein disulfide-isomerase A6                | Q15084            | 170102          | 444656          | 246133          | 258072          | 180730          | 244350          | 0.53                                                                       |
| Protein DJ-1                                  | Q99497            | 342033          | 170704          | 543689          | 492107          | 370948          | 197029          | 0.21                                                                       |
| Protein NipSnap homolog 1                     | Q9BPW8            | 554620          | 339532          | 654851          | 538666          | 91258           | 494848          | 0.12                                                                       |
| Protein-glutamine gamma-glutamyltransferase 2 | P21980            | 280640          | 412463          | 281644          | 444373          | 346645          | 283366          | 0.09                                                                       |
| Pterin-4-alpha-carbinolamine dehydratase      | P61457            | 111669          | 71571           | 107521          | 142307          | 82137           | 66089           | 0.05                                                                       |
| Putative beta-actin-like protein 3            | Q9BYX7            | 3136398         | 1848144         | 1998178         | 3203406         | 7850359         | 4967053         | 0.27                                                                       |
| Putative inactive carboxylesterase 4          | Q9UKY3            | 673661          | 673716          | 904899          | 981529          | 290181          | 595623          | 0.20                                                                       |
| Pyruvate carboxylase, mitochondrial           | P11498            | 242388          | 516917          | 212188          | 251592          | 122564          | 283298          | 0.58                                                                       |
| Pyruvate kinase isozymes M1/M2                | P14618            | 192536          | 78096           | 96074           | 90694           | 356708          | 269119          | 0.27                                                                       |
| Quinone oxidoreductase                        | Q08257            | 630240          | 803534          | 517238          | 560463          | 483693          | 341605          | 0.01                                                                       |
| Rab GDP dissociation inhibitor alpha          | P31150            | 275035          | 199342          | 232406          | 188225          | 195057          | 204269          | 0.14                                                                       |
| Rab GDP dissociation inhibitor beta           | P50395            | 317369          | 152820          | 267253          | 165559          | 130635          | 171181          | 0.08                                                                       |
| Ras GTPase-activating-like protein IQGAP2     | Q13576            | 52852           | 109293          | 82076           | 143967          | 60941           | 70354           | 0.31                                                                       |
| Ras-related protein Rab-1A                    | P62820            | 97026           | 138450          | 88396           | 134877          | 138951          | 77030           | 0.02                                                                       |
| Ras-related protein Rap-1A                    | P62834            | 190383          | 174240          | 187007          | 181260          | 339209          | 177705          | 0.58                                                                       |
| Receptor expression-enhancing protein 6       | Q96HR9            | 394313          | 270467          | 364846          | 246221          | 202868          | 289470          | 0.00                                                                       |
| Retinal dehydrogenase 1                       | P00352            | 640764          | 1052662         | 794067          | 585992          | 703444          | 712443          | 0.18                                                                       |
| Retinol dehydrogenase 16                      | O75452            | 404527          | 399300          | 819999          | 725077          | 178152          | 664770          | 0.27                                                                       |
| Ribonuclease UK114                            | P52758            | 712584          | 871784          | 1101466         | 565073          | 198008          | 653361          | 0.21                                                                       |
| S-adenosylmethionine synthase isoform type-1  | Q00266            | 206731          | 221917          | 857294          | 218241          | 171718          | 385961          | 0.01                                                                       |
| Sarcosine dehydrogenase, mitochondrial        | Q9UL12            | 237901          | 146461          | 673861          | 219883          | 692150          | 227286          | 0.47                                                                       |

Supplementary Table 1

## Relative protein quantitation (relative abundance units)

|                                                                             |                   | Subject<br>#003 | Subject<br>#004 | Subject<br>#005 | Subject<br>#007 | Subject<br>#009 | Subject<br>#011 | Protein<br>Relative<br>Abundance vs<br>Fibrosis Score<br>(r <sup>2</sup> ) |
|-----------------------------------------------------------------------------|-------------------|-----------------|-----------------|-----------------|-----------------|-----------------|-----------------|----------------------------------------------------------------------------|
|                                                                             | Fibrosis<br>Score | 3               | 0               | 2               | 1               | 4               | 0               |                                                                            |
| Selenium-binding protein 1                                                  | Q13228            | 269174          | 460120          | 478881          | 387427          | 331953          | 416338          | 0.43                                                                       |
| Serine hydroxymethyltransferase, cytosolic                                  | P34896            | 103419          | 242258          | 253714          | 246251          | 91124           | 252604          | 0.75                                                                       |
| Serine--pyruvate aminotransferase                                           | P21549            | 963371          | 775850          | 1248220         | 705912          | 361763          | 1041487         | 0.14                                                                       |
| Serotransferrin                                                             | P02787            | 197550          | 223735          | 187065          | 235812          | 546312          | 186073          | 0.44                                                                       |
| Serum albumin                                                               | P02768            | 1264608         | 843497          | 758360          | 742282          | 2074243         | 656875          | 0.73                                                                       |
| Short/branched chain specific acyl-CoA<br>dehydrogenase, mitochondrial      | P45954            | 188899          | 571479          | 651389          | 303017          | 99599           | 364225          | 0.37                                                                       |
| Short-chain specific acyl-CoA dehydrogenase,<br>mitochondrial               | P16219            | 238562          | 454766          | 424167          | 404246          | 158857          | 429138          | 0.84                                                                       |
| Sideroflexin-1                                                              | Q9H9B4            | 421566          | 197220          | 409846          | 240995          | 148725          | 236493          | 0.03                                                                       |
| Solute carrier family 2, facilitated glucose<br>transporter member 2        | P11168            | 109893          | 171615          | 126971          | 92580           | 58719           | 51605           | 0.09                                                                       |
| Sorbitol dehydrogenase                                                      | Q00796            | 472964          | 240475          | 397337          | 438279          | 182375          | 203133          | 0.02                                                                       |
| Spectrin alpha chain, brain                                                 | Q13813            | 150222          | 288942          | 105558          | 184258          | 142156          | 90319           | 0.10                                                                       |
| Stress-70 protein, mitochondrial                                            | P38646            | 286719          | 298779          | 142840          | 194284          | 133980          | 227072          | 0.21                                                                       |
| Succinate dehydrogenase [ubiquinone] flavoprotein<br>subunit, mitochondrial | P31040            | 346803          | 450447          | 266041          | 343266          | 146990          | 282984          | 0.45                                                                       |
| Succinate-semialdehyde dehydrogenase,<br>mitochondrial                      | P51649            | 108023          | 138238          | 165662          | 118327          | 74702           | 160060          | 0.52                                                                       |
| Sulfotransferase 1A1                                                        | P50225            | 212486          | 288308          | 465995          | 459330          | 245442          | 528910          | 0.36                                                                       |
| Superoxide dismutase [Cu-Zn]                                                | P00441            | 457245          | 552857          | 922800          | 484957          | 232852          | 392405          | 0.05                                                                       |
| Superoxide dismutase [Mn], mitochondrial                                    | P04179            | 657785          | 883239          | 335770          | 510350          | 460642          | 347029          | 0.04                                                                       |
| Talin-1                                                                     | Q9Y490            | 384766          | 167009          | 259832          | 103707          | 329971          | 160789          | 0.72                                                                       |
| Tetratricopeptide repeat protein 33                                         | Q6PID6            | 174790          | 134341          | 190471          | 126723          | 297764          | 222060          | 0.37                                                                       |

Supplementary Table 1

## Relative protein quantitation (relative abundance units)

|                                                         |                   | Subject<br>#003 | Subject<br>#004 | Subject<br>#005 | Subject<br>#007 | Subject<br>#009 | Subject<br>#011 | Protein<br>Relative<br>Abundance vs<br>Fibrosis Score<br>(r <sup>2</sup> ) |
|---------------------------------------------------------|-------------------|-----------------|-----------------|-----------------|-----------------|-----------------|-----------------|----------------------------------------------------------------------------|
|                                                         | Fibrosis<br>Score | 3               | 0               | 2               | 1               | 4               | 0               |                                                                            |
| Transforming growth factor-beta-induced protein ig-h3   | Q15582            | 108640          | 75347           | 74142           | 109238          | 164131          | 82862           | 0.60                                                                       |
| Thioredoxin-dependent peroxide reductase, mitochondrial | P30048            | 703891          | 653841          | 877673          | 649288          | 322639          | 752181          | 0.27                                                                       |
| Thiosulfate sulfurtransferase                           | Q16762            | 517990          | 738458          | 839561          | 295008          | 233012          | 1013266         | 0.40                                                                       |
| Thymidine phosphorylase                                 | P19971            | 199934          | 249652          | 62457           | 141936          | 222649          | 166154          | 0.00                                                                       |
| Titin                                                   | Q8WZ42            | 119069          | 112111          | 37581           | 142389          | 119531          | 166926          | 0.10                                                                       |
| Transitional endoplasmic reticulum ATPase               | P55072            | 190963          | 138936          | 116861          | 144239          | 139861          | 110615          | 0.22                                                                       |
| Transketolase                                           | P29401            | 279026          | 366654          | 137872          | 175814          | 280822          | 138339          | 0.02                                                                       |
| Trifunctional enzyme subunit alpha, mitochondrial       | P40939            | 266439          | 259370          | 488121          | 276743          | 232436          | 394676          | 0.07                                                                       |
| Trifunctional enzyme subunit beta, mitochondrial        | P55084            | 579074          | 621268          | 149764          | 733928          | 224247          | 244328          | 0.08                                                                       |
| Triosephosphate isomerase                               | P60174            | 518834          | 457509          | 568470          | 458353          | 446480          | 495912          | 0.01                                                                       |
| Tripeptidyl-peptidase 1                                 | O14773            | 323319          | 649561          | 737563          | 308494          | 411842          | 228362          | 0.00                                                                       |
| Tropomyosin alpha-1 chain                               | P09493            | 547638          | 563362          | 778518          | 455018          | 557770          | 817380          | 0.07                                                                       |
| Tubulin alpha-1A chain                                  | Q71U36            | 859939          | 674352          | 590628          | 440398          | 703606          | 511317          | 0.34                                                                       |
| Tubulin alpha-1B chain                                  | P68363            | 1709862         | 1289687         | 719981          | 912061          | 1146304         | 921777          | 0.10                                                                       |
| Tubulin beta chain                                      | P07437            | 261355          | 506499          | 180804          | 381288          | 430937          | 545378          | 0.26                                                                       |
| Tubulin beta-1 chain                                    | Q9H4B7            | 473291          | 585317          | 179866          | 191000          | 636882          | 759175          | 0.01                                                                       |
| Tubulin beta-2A chain                                   | Q13885            | 403802          | 439371          | 247221          | 354059          | 461813          | 243764          | 0.18                                                                       |
| Tubulin beta-3 chain                                    | Q13509            | 166022          | 422122          | 349708          | 176775          | 142994          | 163797          | 0.19                                                                       |
| Tubulin beta-4A chain                                   | P04350            | 219196          | 219081          | 287775          | 158776          | 216158          | 151416          | 0.17                                                                       |
| Type I inositol-3,4-bisphosphate 4-phosphatase          | Q96PE3            | 341799          | 369389          | 385697          | 313398          | 335283          | 385792          | 0.17                                                                       |

Supplementary Table 1

## Relative protein quantitation (relative abundance units)

|                                                                   |                   | Subject<br>#003 | Subject<br>#004 | Subject<br>#005 | Subject<br>#007 | Subject<br>#009 | Subject<br>#011 | Protein<br>Relative<br>Abundance vs<br>Fibrosis Score<br>(r <sup>2</sup> ) |
|-------------------------------------------------------------------|-------------------|-----------------|-----------------|-----------------|-----------------|-----------------|-----------------|----------------------------------------------------------------------------|
|                                                                   | Fibrosis<br>Score | 3               | 0               | 2               | 1               | 4               | 0               |                                                                            |
| Ubiquitin-60S ribosomal protein L40                               | P62987            | 1449660         | 1139230         | 1014710         | 932848          | 1862468         | 1157719         | 0.60                                                                       |
| UDP-glucose 6-dehydrogenase                                       | O60701            | 180664          | 432347          | 228292          | 228194          | 86757           | 234822          | 0.65                                                                       |
| UDP-glucuronosyltransferase 1-1                                   | P22309            | 255065          | 694079          | 136377          | 149674          | 216184          | 235772          | 0.20                                                                       |
| UDP-glucuronosyltransferase 1-10                                  | Q9HAW8            | 212468          | 713681          | 408846          | 248535          | 142542          | 514565          | 0.69                                                                       |
| UDP-glucuronosyltransferase 1-4                                   | P22310            | 765404          | 566843          | 605745          | 254091          | 219322          | 242903          | 0.01                                                                       |
| UDP-glucuronosyltransferase 2B4                                   | P06133            | 546673          | 497816          | 335606          | 217334          | 296539          | 305526          | 0.00                                                                       |
| UDP-glucuronosyltransferase 2B7                                   | P16662            | 417669          | 409813          | 539230          | 200338          | 340375          | 171213          | 0.14                                                                       |
| UTP--glucose-1-phosphate uridylyltransferase                      | Q16851            | 475766          | 501346          | 536491          | 304878          | 274912          | 492072          | 0.20                                                                       |
| Very long-chain acyl-CoA synthetase                               | O14975            | 205157          | 342755          | 223850          | 265818          | 120463          | 339131          | 0.97                                                                       |
| Very long-chain specific acyl-CoA dehydrogenase,<br>mitochondrial | P49748            | 186587          | 179784          | 148026          | 208817          | 126272          | 151288          | 0.16                                                                       |
| Vimentin                                                          | P08670            | 457354          | 352157          | 259116          | 313064          | 1242378         | 255864          | 0.58                                                                       |
| Vinculin                                                          | P18206            | 137409          | 96949           | 51386           | 90821           | 517914          | 89404           | 0.52                                                                       |
| Voltage-dependent anion-selective channel protein<br>1            | P21796            | 288950          | 209133          | 93334           | 477319          | 531222          | 432717          | 0.04                                                                       |
| Xanthine dehydrogenase/oxidase                                    | P47989            | 119484          | 137317          | 112105          | 60063           | 171274          | 188489          | 0.00                                                                       |
| Zinc finger protein 891                                           | A8MT65            | 79656           | 46911           | 39968           | 53149           | 136749          | 160549          | 0.02                                                                       |
