# Supplementary material for: Turnover Rates of Hepatic Collagen and Circulating Collagen-Associated Proteins in Humans with Chronic Liver Disease
Source: PubMed Central journal article supplement (PMC4409311; doi:10.1371/journal.pone.0123311), 2015-04-24
Supplement: pone.0123311.s003.pdf [file pone.0123311.s003.pdf]

Supplementary Table 2

Total fraction new at end of labeling period - % new (F)

|                                                 | Fibrosis Score    | Subject #003 | Subject #004 | Subject #005 | Subject #007 | Subject #009 | Subject #011 |
|-------------------------------------------------|-------------------|--------------|--------------|--------------|--------------|--------------|--------------|
|                                                 |                   | 3            | 0            | 2            | 1            | 4            | 0            |
| Liver Proteins                                  | Uniprot Accession |              |              |              |              |              |              |
| 1,4-alpha-glucan-branching enzyme               | Q04446            |              |              | 30.88%       |              |              |              |
| 14-3-3 protein epsilon                          | P62258            |              |              |              |              |              | 72.43%       |
| 14-3-3 protein eta                              | Q04917            |              |              |              |              | 34.39%       | 36.91%       |
| 17-beta-hydroxysteroid dehydrogenase 13         | Q7Z5P4            |              | 75.91%       | 79.19%       | 97.87%       |              | 74.13%       |
| 17-beta-hydroxysteroid dehydrogenase type 6     | O14756            |              |              | 62.68%       | 74.18%       |              | 73.86%       |
| 2,4-dienoyl-CoA reductase, mitochondrial        | Q16698            | 93.15%       | 51.27%       | 51.38%       | 84.89%       |              | 64.27%       |
| 3-hydroxyacyl-CoA dehydratase 3                 | Q9P035            |              |              | 57.24%       |              |              |              |
| 3-hydroxyacyl-CoA dehydrogenase type-2          | Q99714            | 52.52%       | 42.53%       | 42.53%       | 52.36%       |              | 47.27%       |
| 3-hydroxyanthranilate 3,4-dioxygenase           | P46952            |              |              | 40.76%       |              |              |              |
| 3-ketoacyl-CoA thiolase, mitochondrial          | P42765            | 81.48%       | 46.94%       | 45.07%       | 78.16%       | 79.03%       | 53.81%       |
| 3-ketoacyl-CoA thiolase, peroxisomal            | P09110            | 100.67%      | 76.45%       | 67.06%       | 84.66%       | 90.61%       | 68.38%       |
| 3-mercaptopyruvate sulfurtransferase            | P25325            | 95.52%       | 57.54%       | 54.17%       | 78.49%       |              | 58.36%       |
| 40S ribosomal protein S7                        | P62081            |              | 70.49%       | 62.69%       | 89.55%       |              | 68.47%       |
| 40S ribosomal protein S8                        | P62241            | 23.12%       | 5.75%        | 5.39%        | 36.76%       | 31.51%       | 8.73%        |
| 40S ribosomal protein SA                        | P08865            | 86.45%       | 54.32%       | 52.22%       | 74.14%       | 71.14%       | 54.13%       |
| 4-aminobutyrate aminotransferase, mitochondrial | P80404            | 90.42%       | 58.38%       | 48.13%       | 76.79%       | 94.46%       | 59.39%       |
| 4-hydroxyphenylpyruvate dioxygenase             | P32754            |              | 91.59%       | 77.97%       |              |              | 77.07%       |
| 4-trimethylaminobutyraldehyde dehydrogenase     | P49189            |              | 46.09%       | 44.96%       |              |              |              |
| 60 kDa heat shock protein, mitochondrial        | P10809            | 87.05%       | 50.39%       | 45.29%       | 73.48%       |              | 53.91%       |
| 60S acidic ribosomal protein P0                 | P05388            |              |              | 52.12%       |              |              |              |
| 60S ribosomal protein L6                        | Q02878            | 79.22%       | 51.32%       | 51.69%       | 68.00%       | 55.20%       | 53.24%       |
| 60S ribosomal protein L7                        | P18124            | 95.32%       |              |              |              |              |              |
| 78 kDa glucose-regulated protein                | P11021            | 102.49%      | 76.33%       | 62.58%       | 87.18%       | 96.40%       | 79.34%       |
| Abhydrolase domain-containing protein 14B       | Q96IU4            |              | 77.95%       |              |              |              |              |

Supplementary Table 2

Total fraction new at end of labeling period - % new (F)

|                                                  |                | Subject #003 | Subject #004 | Subject #005 | Subject #007 | Subject #009 | Subject #011 |
|--------------------------------------------------|----------------|--------------|--------------|--------------|--------------|--------------|--------------|
|                                                  | Fibrosis Score | 3            | 0            | 2            | 1            | 4            | 0            |
| Acetyl-CoA acetyltransferase, cytosolic          | Q9BWD1         |              | 51.96%       | 52.67%       | 67.44%       |              | 80.75%       |
| Acetyl-CoA acetyltransferase, mitochondrial      | P24752         | 83.72%       | 52.77%       | 41.38%       | 78.63%       | 70.53%       | 49.96%       |
| Aconitate hydratase, mitochondrial               | Q99798         |              | 70.22%       |              |              |              |              |
| Actin, alpha skeletal muscle                     | P68133         |              |              |              |              |              | 9.48%        |
| Actin, aortic smooth muscle                      | P62736         | 93.33%       | 50.79%       | 48.98%       | 72.21%       | 37.71%       | 12.67%       |
| Actin, cytoplasmic 1                             | P60709         | 84.88%       | 55.94%       | 49.63%       | 74.02%       | 51.79%       | 54.80%       |
| Acyl-coenzyme A synthetase ACSM2A, mitochondrial | Q08AH3         |              | 55.43%       | 53.26%       |              |              |              |
| Acyl-coenzyme A thioesterase 1                   | Q86TX2         |              | 60.49%       |              |              |              | 57.38%       |
| Adenylate kinase 2, mitochondrial                | P54819         |              | 45.40%       | 50.51%       |              |              |              |
| ADP/ATP translocase 1                            | P12235         |              | 54.57%       | 68.90%       | 85.58%       |              | 54.53%       |
| Aflatoxin B1 aldehyde reductase member 3         | O95154         |              | 76.54%       |              |              |              |              |
| Agmatinase, mitochondrial                        | Q9BSE5         |              |              | 33.69%       |              |              |              |
| Alanine aminotransferase 1                       | P24298         |              |              | 28.31%       |              |              |              |
| Alcohol dehydrogenase [NADP+]                    | P14550         |              |              | 68.08%       |              |              |              |
| Alcohol dehydrogenase 1A                         | P07327         | 95.49%       | 59.93%       | 43.79%       | 78.37%       | 70.39%       | 56.61%       |
| Alcohol dehydrogenase 1B                         | P00325         | 95.13%       | 58.48%       | 40.30%       | 74.17%       | 84.42%       | 57.70%       |
| Alcohol dehydrogenase 1C                         | P00326         | 96.31%       | 61.22%       |              | 84.16%       |              | 59.47%       |
| Alcohol dehydrogenase 4                          | P08319         | 100.36%      | 61.47%       | 46.73%       | 76.33%       | 86.49%       | 61.52%       |
| Alcohol dehydrogenase 6                          | P28332         |              | 46.82%       | 48.70%       | 70.01%       |              | 55.40%       |
| Alcohol dehydrogenase class-3                    | P11766         |              | 46.93%       | 32.23%       |              |              |              |
| Aldehyde dehydrogenase family 8 member A1        | Q9H2A2         |              | 70.12%       | 55.80%       |              |              | 60.83%       |
| Aldehyde dehydrogenase X, mitochondrial          | P30837         | 100.77%      | 61.21%       |              | 96.02%       | 96.53%       | 61.46%       |
| Aldehyde dehydrogenase, mitochondrial            | P05091         | 101.68%      | 68.33%       | 60.89%       | 83.66%       | 99.04%       | 69.34%       |
| Aldehyde oxidase                                 | Q06278         |              | 70.58%       | 72.00%       | 84.03%       |              | 65.25%       |
| Aldo-keto reductase family 1 member C1           | Q04828         |              | 63.01%       | 46.66%       | 68.73%       | 88.52%       | 55.57%       |
| Aldo-keto reductase family 1 member C3           | P42330         |              |              | 47.71%       |              |              |              |
| Aldo-keto reductase family 1 member C4           | P17516         |              |              | 49.18%       |              |              |              |
| Alpha-1-antitrypsin                              | P01009         |              | 75.45%       |              |              | 93.00%       | 86.47%       |

Supplementary Table 2

Total fraction new at end of labeling period - % new (F)

|                                            |                | Subject #003 | Subject #004 | Subject #005 | Subject #007 | Subject #009 | Subject #011 |
|--------------------------------------------|----------------|--------------|--------------|--------------|--------------|--------------|--------------|
|                                            | Fibrosis Score | 3            | 0            | 2            | 1            | 4            | 0            |
| Alpha-2-macroglobulin                      | P01023         | 85.17%       | 62.74%       | 54.75%       | 71.62%       | 73.84%       | 51.44%       |
| Alpha-actinin-1                            | P12814         | 95.48%       | 73.65%       |              | 84.87%       | 68.06%       | 38.76%       |
| Alpha-actinin-2                            | P35609         |              |              |              |              |              | 22.31%       |
| Alpha-actinin-4                            | O43707         | 83.31%       | 58.67%       | 57.48%       |              | 58.97%       | 48.70%       |
| Alpha-enolase                              | P06733         | 101.49%      | 65.36%       | 42.36%       | 83.52%       | 98.20%       | 70.52%       |
| Amine oxidase [flavin-containing] A        | P21397         |              | 45.47%       | 44.71%       | 68.98%       |              |              |
| Amine oxidase [flavin-containing] B        | P27338         | 99.60%       | 47.94%       | 26.88%       | 82.90%       |              |              |
| Aminoacylase-1                             | Q03154         |              | 59.00%       | 50.50%       | 71.90%       | 96.25%       | 66.55%       |
| Annexin A1                                 | P04083         |              |              |              |              | 69.27%       |              |
| Annexin A2                                 | P07355         |              | 58.01%       |              |              | 55.55%       | 49.55%       |
| Annexin A4                                 | P09525         |              |              |              |              | 89.70%       |              |
| Annexin A5                                 | P08758         |              | 65.23%       | 64.06%       | 82.47%       | 77.25%       | 60.28%       |
| Annexin A6                                 | P08133         | 98.52%       | 76.68%       | 72.19%       | 96.40%       | 88.56%       | 70.84%       |
| Apolipoprotein A-I                         | P02647         |              |              |              |              | 73.97%       |              |
| Apoptosis-inducing factor 1, mitochondrial | O95831         |              | 42.18%       | 27.52%       | 65.88%       |              | 39.30%       |
| Arginase-1                                 | P05089         | 87.95%       | 54.91%       | 44.15%       | 72.12%       |              | 57.40%       |
| Argininosuccinate lyase                    | P04424         | 83.63%       | 56.97%       | 57.44%       | 65.16%       | 75.70%       | 57.40%       |
| Argininosuccinate synthase                 | P00966         |              | 66.41%       | 50.21%       | 75.61%       |              | 73.25%       |
| Arylacetamide deacetylase                  | P22760         |              |              |              |              |              | 77.43%       |
| Aspartate aminotransferase, cytoplasmic    | P17174         | 98.70%       | 63.08%       | 53.48%       | 83.87%       |              | 57.55%       |
| Aspartate aminotransferase, mitochondrial  | P00505         | 81.36%       | 49.94%       | 43.66%       | 73.66%       | 71.63%       | 46.22%       |
| ATP synthase subunit alpha, mitochondrial  | P25705         | 100.10%      | 57.25%       | 52.56%       | 85.48%       | 75.65%       | 57.08%       |
| ATP synthase subunit b, mitochondrial      | P24539         |              | 45.19%       |              | 71.06%       |              |              |
| ATP synthase subunit beta, mitochondrial   | P06576         | 92.60%       | 48.87%       | 41.53%       | 81.60%       | 80.44%       | 49.27%       |
| ATP synthase subunit delta, mitochondrial  | P30049         |              |              |              | 81.37%       |              |              |
| ATP synthase subunit f, mitochondrial      | P56134         |              | 43.11%       |              |              |              |              |
| ATP synthase subunit O, mitochondrial      | P48047         | 86.82%       | 42.31%       | 71.45%       | 58.51%       |              | 59.94%       |
| ATP-binding cassette sub-family D member 3 | P28288         |              | 64.73%       | 57.52%       | 81.42%       |              | 76.65%       |
| Beta-actin-like protein 2                  | Q562R1         |              |              | 39.83%       |              |              |              |

Supplementary Table 2

Total fraction new at end of labeling period - % new (F)

|                                                                              |                | Subject #003 | Subject #004 | Subject #005 | Subject #007 | Subject #009 | Subject #011 |
|------------------------------------------------------------------------------|----------------|--------------|--------------|--------------|--------------|--------------|--------------|
|                                                                              | Fibrosis Score | 3            | 0            | 2            | 1            | 4            | 0            |
| Beta-enolase                                                                 | P13929         |              |              |              |              |              | 52.95%       |
| Betaine--homocysteine S-methyltransferase 1                                  | Q93088         | 98.02%       | 64.46%       | 54.88%       | 80.63%       |              | 64.57%       |
| Betaine--homocysteine S-methyltransferase 2                                  | Q9H2M3         |              |              | 59.24%       |              |              | 51.03%       |
| Bifunctional ATP-dependent dihydroxyacetone kinase/FAD-AMP lyase (cyclizing) | Q3LXA3         | 90.94%       | 57.04%       | 54.42%       | 71.57%       |              | 57.30%       |
| Biglycan                                                                     | P21810         |              |              |              |              | 32.65%       |              |
| Bile acid-CoA:amino acid N-acyltransferase                                   | Q14032         |              | 59.23%       | 41.37%       |              |              | 73.80%       |
| Bile acyl-CoA synthetase                                                     | Q9Y2P5         |              | 74.76%       | 57.47%       | 85.30%       |              | 70.56%       |
| Bile salt sulfotransferase                                                   | Q06520         | 98.88%       | 62.24%       | 54.68%       | 83.23%       |              | 64.58%       |
| C-1-tetrahydrofolate synthase, cytoplasmic                                   | P11586         | 72.35%       | 51.57%       | 41.35%       | 58.76%       |              | 58.65%       |
| Calcium-binding mitochondrial carrier protein Aralar1                        | O75746         |              | 46.85%       |              | 63.14%       |              | 50.34%       |
| Calcium-binding mitochondrial carrier protein Aralar2                        | Q9UJS0         | 86.73%       | 46.01%       | 34.66%       | 75.48%       |              | 53.02%       |
| Caldesmon                                                                    | Q05682         |              |              |              |              | 81.10%       |              |
| Calmodulin                                                                   | P62158         |              |              |              |              | 95.70%       | 89.22%       |
| Calnexin                                                                     | P27824         | 103.89%      | 74.55%       | 64.24%       |              |              | 70.29%       |
| Calreticulin                                                                 | P27797         | 109.41%      | 66.82%       | 61.52%       | 75.87%       | 84.77%       | 71.89%       |
| Calsequestrin-1                                                              | P31415         |              |              |              |              |              | 15.37%       |
| Carbamoyl-phosphate synthase [ammonia], mitochondrial                        | P31327         | 87.63%       | 47.79%       | 41.85%       | 77.01%       | 80.08%       | 51.03%       |
| Carbonic anhydrase 1                                                         | P00915         |              |              | 26.51%       |              | 58.57%       |              |
| Carbonic anhydrase 2                                                         | P00918         | 89.24%       | 57.72%       | 45.82%       | 75.87%       | 73.82%       | 55.03%       |
| Carbonic anhydrase 3                                                         | P07451         |              |              |              | 87.41%       |              | 22.35%       |
| Carbonyl reductase [NADPH] 1                                                 | P16152         | 93.21%       | 59.10%       | 52.55%       | 72.11%       | 77.01%       | 58.59%       |
| Catalase                                                                     | P04040         | 97.82%       | 66.35%       | 65.82%       | 83.43%       | 81.49%       | 70.16%       |
| Cathepsin D                                                                  | P07339         | 103.88%      | 68.31%       | 58.14%       | 86.91%       | 92.44%       | 74.94%       |
| Clathrin heavy chain 1                                                       | Q00610         |              |              |              |              |              | 65.23%       |
| Cocaine esterase                                                             | O00748         |              | 47.67%       | 34.09%       |              |              |              |

Supplementary Table 2

Total fraction new at end of labeling period - % new (F)

|                                                  |                | Subject #003 | Subject #004 | Subject #005 | Subject #007 | Subject #009 | Subject #011 |
|--------------------------------------------------|----------------|--------------|--------------|--------------|--------------|--------------|--------------|
|                                                  | Fibrosis Score | 3            | 0            | 2            | 1            | 4            | 0            |
| Cofilin-1                                        | P23528         |              |              | 28.58%       |              | 79.22%       |              |
| Collagen alpha-1(I) chain                        | P02452         | 18.65%       | 4.26%        | 7.41%        | 12.13%       | 11.66%       | 6.41%        |
| Collagen alpha-1(III) chain                      | P02461         | 17.60%       | 5.28%        | 4.68%        | 9.37%        | 8.77%        | 6.69%        |
| Collagen alpha-1(IV) chain                       | P02462         |              |              | 1.81%        |              | 18.48%       |              |
| Collagen alpha-1(VI) chain                       | P12109         | 34.81%       | 16.54%       | 17.33%       | 34.35%       | 22.13%       | 16.80%       |
| Collagen alpha-1(XIV) chain                      | Q05707         |              |              |              |              | 38.24%       |              |
| Collagen alpha-2(I) chain                        | P08123         | 19.58%       | 8.65%        | 9.37%        | 12.68%       | 11.59%       | 8.35%        |
| Collagen alpha-3(VI) chain                       | P12111         | 28.21%       | 24.51%       | 12.37%       | 25.41%       | 18.63%       | 19.25%       |
| Complement C3                                    | P01024         |              | 97.13%       |              | 81.81%       |              |              |
| Complement C4-A                                  | P0C0L4         |              | 82.13%       |              |              |              |              |
| Corticosteroid 11-beta-dehydrogenase isozyme 1   | P28845         |              | 78.97%       |              |              |              |              |
| Creatine kinase M-type                           | P06732         |              |              |              |              |              | 16.36%       |
| Creatine kinase S-type, mitochondrial            | P17540         |              |              |              |              |              | 39.94%       |
| Cullin-associated NEDD8-dissociated protein 1    | Q86VP6         |              | 50.56%       | 47.48%       |              |              |              |
| Cystathionine gamma-lyase                        | P32929         | 107.46%      | 75.44%       | 55.98%       | 96.23%       |              | 66.98%       |
| Cytochrome b5                                    | P00167         | 106.58%      | 65.41%       | 57.12%       | 84.83%       | 89.46%       | 67.84%       |
| Cytochrome b-c1 complex subunit 2, mitochondrial | P22695         |              |              |              |              |              | 57.17%       |
| Cytochrome c oxidase subunit 2                   | P00403         | 85.35%       | 57.55%       | 43.35%       | 91.81%       | 81.64%       | 55.12%       |
| Cytochrome c oxidase subunit 5A, mitochondrial   | P20674         |              | 42.35%       | 34.92%       | 65.14%       |              | 41.99%       |
| Cytochrome P450 1A2                              | P05177         |              | 73.40%       |              | 65.12%       |              |              |
| Cytochrome P450 2A6                              | P11509         |              | 101.36%      |              |              |              |              |
| Cytochrome P450 2C8                              | P10632         |              | 97.51%       | 101.84%      |              |              |              |
| Cytochrome P450 2C9                              | P11712         | 94.02%       | 83.99%       | 63.08%       | 86.00%       |              | 80.84%       |
| Cytochrome P450 2E1                              | P05181         |              |              |              | 85.61%       |              |              |
| Cytochrome P450 3A4                              | P08684         |              |              | 75.74%       |              |              |              |
| Cytochrome P450 3A5                              | P20815         |              | 76.90%       |              | 75.72%       | 93.98%       | 77.39%       |

Supplementary Table 2

Total fraction new at end of labeling period - % new (F)

|                                                                          |                       | Subject #003 | Subject #004 | Subject #005 | Subject #007 | Subject #009 | Subject #011 |
|--------------------------------------------------------------------------|-----------------------|--------------|--------------|--------------|--------------|--------------|--------------|
|                                                                          | <b>Fibrosis Score</b> | <b>3</b>     | <b>0</b>     | <b>2</b>     | <b>1</b>     | <b>4</b>     | <b>0</b>     |
| Cytoplasmic aconitate hydratase                                          | P21399                |              | 61.12%       | 52.86%       | 81.05%       |              |              |
| Cytosol aminopeptidase                                                   | P28838                |              | 67.20%       |              |              |              | 74.02%       |
| Cytosolic 10-formyltetrahydrofolate dehydrogenase                        | O75891                |              | 53.49%       | 60.92%       | 93.43%       |              | 57.97%       |
| Cytosolic non-specific dipeptidase                                       | Q96KP4                | 70.97%       | 57.18%       | 31.06%       |              |              | 80.80%       |
| D-beta-hydroxybutyrate dehydrogenase, mitochondrial                      | Q02338                | 96.54%       | 48.47%       | 57.34%       |              |              | 52.22%       |
| D-dopachrome decarboxylase                                               | P30046                |              | 60.38%       | 47.92%       | 81.59%       | 81.27%       | 60.69%       |
| Delta(3,5)-Delta(2,4)-dienoyl-CoA isomerase, mitochondrial               | Q13011                | 88.13%       | 49.83%       |              | 75.09%       | 73.56%       | 57.22%       |
| Delta-1-pyrroline-5-carboxylate dehydrogenase, mitochondrial             | P30038                | 92.90%       | 55.33%       | 50.84%       | 83.61%       | 49.54%       | 59.35%       |
| Delta-aminolevulinic acid dehydratase                                    | P13716                |              |              | 37.26%       |              |              |              |
| Desmin                                                                   | P17661                |              |              |              |              | 61.67%       | 61.98%       |
| Dihydropyrimidinase                                                      | Q14117                |              |              | 62.10%       | 91.70%       |              | 70.09%       |
| Dimethylaniline monooxygenase [N-oxide-forming] 3                        | P31513                |              | 69.67%       | 55.11%       | 77.93%       |              |              |
| Dimethylglycine dehydrogenase, mitochondrial                             | Q9UI17                |              | 48.99%       | 62.73%       |              |              |              |
| Dolichyl-diphosphooligosaccharide--protein glycosyltransferase subunit 1 | P04843                | 89.46%       | 50.88%       |              | 70.20%       |              |              |
| Dolichyl-diphosphooligosaccharide--protein glycosyltransferase subunit 2 | P04844                |              | 65.99%       | 54.69%       | 75.44%       |              | 55.86%       |
| Elastin                                                                  | P15502                |              |              |              |              | 7.86%        |              |
| Electron transfer flavoprotein subunit alpha, mitochondrial              | P13804                | 89.84%       | 49.58%       | 46.01%       | 75.94%       | 77.93%       | 49.71%       |
| Electron transfer flavoprotein subunit beta                              | P38117                | 67.15%       | 48.44%       | 42.74%       | 85.22%       |              | 59.50%       |
| Electron transfer flavoprotein-ubiquinone oxidoreductase, mitochondrial  | Q16134                |              | 68.59%       | 59.55%       |              |              | 76.79%       |

Supplementary Table 2

Total fraction new at end of labeling period - % new (F)

|                                                                |                 | Subject #003 | Subject #004 | Subject #005 | Subject #007 | Subject #009 | Subject #011 |
|----------------------------------------------------------------|-----------------|--------------|--------------|--------------|--------------|--------------|--------------|
|                                                                | <b>Fibrosis</b> |              |              |              |              |              |              |
|                                                                | <b>Score</b>    | <b>3</b>     | <b>0</b>     | <b>2</b>     | <b>1</b>     | <b>4</b>     | <b>0</b>     |
| Elongation factor 1-alpha 1                                    | P68104          | 90.45%       | 61.96%       | 55.87%       | 69.03%       | 77.40%       | 55.06%       |
| Elongation factor 2                                            | P13639          |              | 85.18%       | 75.04%       |              |              |              |
| Endoplasmic reticulum chaperone protein                        | P14625          | 102.60%      | 73.35%       | 65.52%       | 87.97%       | 95.42%       | 77.69%       |
| Enoyl-CoA hydratase domain-containing protein 2, mitochondrial | Q86YB7          |              | 53.38%       | 58.12%       | 96.52%       |              | 80.40%       |
| Enoyl-CoA hydratase, mitochondrial                             | P30084          | 86.48%       | 44.92%       | 41.81%       | 72.24%       | 72.59%       | 48.89%       |
| Epoxide hydrolase 1                                            | P07099          | 98.15%       | 63.71%       | 52.81%       | 82.49%       | 86.46%       | 66.28%       |
| Epoxide hydrolase 2                                            | P34913          |              | 67.44%       | 52.54%       | 80.70%       |              | 73.63%       |
| Ester hydrolase C11orf54                                       | Q9H0W9          |              | 54.78%       | 67.96%       |              |              |              |
| Estradiol 17-beta-dehydrogenase 11                             | Q8NBQ5          |              |              | 62.89%       |              |              |              |
| Fatty acid synthase                                            | P49327          | 105.87%      | 86.59%       | 91.38%       | 79.43%       |              | 82.10%       |
| Fatty acid-binding protein, liver                              | P07148          | 93.26%       | 73.50%       | 47.63%       | 78.45%       | 83.61%       | 59.10%       |
| Ferritin light chain                                           | P02792          | 95.31%       | 70.40%       | 77.45%       | 83.76%       | 97.61%       | 65.16%       |
| Fibronectin                                                    | P02751          | 104.52%      | 60.85%       |              |              | 81.85%       | 80.44%       |
| Filamin-A                                                      | P21333          |              |              |              | 108.52%      | 53.81%       | 80.16%       |
| Filamin-B                                                      | O75369          |              |              | 60.70%       |              |              |              |
| Filamin-C                                                      | Q14315          |              |              |              |              |              | 26.46%       |
| Flavin reductase (NADPH)                                       | P30043          |              | 53.46%       | 54.53%       | 69.77%       |              | 65.26%       |
| Formimidoyltransferase-cyclodeaminase                          | O95954          | 91.20%       | 62.17%       | 54.44%       | 80.74%       | 87.14%       | 59.95%       |
| Fructose-1,6-bisphosphatase 1                                  | P09467          | 104.22%      | 68.29%       | 52.19%       | 86.82%       | 80.55%       | 65.05%       |
| Fructose-bisphosphate aldolase A                               | P04075          |              |              |              |              |              | 42.13%       |
| Fructose-bisphosphate aldolase B                               | P05062          | 111.24%      | 77.15%       | 65.90%       | 84.37%       | 95.51%       | 74.32%       |
| Fumarate hydratase, mitochondrial                              | P07954          |              | 50.49%       | 45.47%       | 76.69%       |              | 51.00%       |
| Fumarylacetoacetase                                            | P16930          | 89.91%       | 56.58%       | 42.86%       | 71.22%       | 69.76%       | 50.09%       |
| Galactokinase                                                  | P51570          |              | 50.23%       | 42.12%       |              |              | 51.13%       |
| Galectin-1                                                     | P09382          |              |              |              |              | 58.98%       | 61.11%       |
| Gamma-glutamyltransferase 5                                    | P36269          | 98.64%       |              | 58.23%       |              | 60.85%       |              |
| Gelsolin                                                       | P06396          |              | 57.90%       | 64.72%       |              |              |              |
| Glucose-6-phosphate isomerase                                  | P06744          | 77.30%       | 52.15%       | 45.38%       | 75.83%       | 72.33%       | 50.52%       |

Supplementary Table 2

Total fraction new at end of labeling period - % new (F)

|                                                        |                | Subject #003 | Subject #004 | Subject #005 | Subject #007 | Subject #009 | Subject #011 |
|--------------------------------------------------------|----------------|--------------|--------------|--------------|--------------|--------------|--------------|
|                                                        | Fibrosis Score | 3            | 0            | 2            | 1            | 4            | 0            |
| Glutamate dehydrogenase 1, mitochondrial               | P00367         | 87.26%       | 43.79%       | 38.33%       | 76.89%       |              | 43.42%       |
| Glutathione S-transferase A1                           | P08263         | 93.75%       | 58.45%       | 41.51%       | 74.62%       | 86.92%       | 57.54%       |
| Glutathione S-transferase kappa 1                      | Q9Y2Q3         |              | 67.96%       |              |              |              | 74.51%       |
| Glutathione S-transferase Mu 1                         | P09488         | 91.49%       |              | 52.38%       | 65.98%       |              | 65.08%       |
| Glutathione S-transferase omega-1                      | P78417         |              |              | 35.67%       |              |              |              |
| Glyceraldehyde-3-phosphate dehydrogenase               | P04406         | 95.24%       | 59.62%       | 50.23%       | 79.11%       | 64.22%       | 50.29%       |
| Glycerol-3-phosphate dehydrogenase [NAD+], cytoplasmic | P21695         |              | 60.22%       | 46.27%       |              |              |              |
| Glycine amidinotransferase, mitochondrial              | P50440         | 104.05%      | 69.98%       | 68.17%       | 81.68%       | 90.24%       | 66.90%       |
| Glycine dehydrogenase [decarboxylating], mitochondrial | P23378         |              |              | 15.99%       |              |              |              |
| Glycogen debranching enzyme                            | P35573         |              |              | 19.89%       |              |              | 35.83%       |
| Glycogen phosphorylase, brain form                     | P11216         |              |              |              |              |              | 37.80%       |
| Glycogen phosphorylase, liver form                     | P06737         | 75.62%       | 46.99%       | 30.22%       | 60.46%       |              | 32.21%       |
| Glycogen phosphorylase, muscle form                    | P11217         |              |              |              |              |              | 26.70%       |
| Glyoxylate reductase/hydroxypyruvate reductase         | Q9UBQ7         | 87.44%       | 56.97%       | 46.20%       | 73.77%       | 75.96%       | 55.26%       |
| Heat shock 70 kDa protein 1A/1B                        | P08107         |              | 73.34%       | 69.27%       |              | 72.62%       | 59.46%       |
| Heat shock cognate 71 kDa protein                      | P11142         |              | 80.69%       |              | 89.96%       |              |              |
| Heat shock protein beta-1                              | P04792         | 99.56%       | 69.28%       | 63.57%       | 80.61%       | 76.66%       | 58.63%       |
| Heat shock-related 70 kDa protein 2                    | P54652         |              |              | 59.33%       | 88.25%       |              | 82.67%       |
| Hemoglobin subunit alpha                               | P69905         | 30.42%       | 10.13%       | 12.24%       | 37.10%       | 40.45%       | 11.75%       |
| Hemoglobin subunit beta                                | P68871         | 29.17%       | 9.63%        | 6.63%        | 39.31%       | 36.81%       | 14.35%       |
| Hemoglobin subunit delta                               | P02042         | 39.52%       | 20.27%       | 25.79%       | 54.39%       | 51.01%       | 21.29%       |
| Hemoglobin subunit gamma-1                             | P69891         |              |              | 15.67%       |              |              |              |
| Heterogeneous nuclear ribonucleoprotein K              | P61978         | 101.01%      | 77.56%       | 88.93%       |              | 97.46%       |              |
| Histone H2A type 1-A                                   | Q96QV6         |              | 35.68%       | 24.45%       | 51.89%       | 30.27%       | 28.63%       |
| Histone H2A type 1-B/E                                 | P04908         | 54.67%       | 26.91%       | 10.42%       | 41.99%       | 24.35%       | 20.52%       |
| Histone H2B type 1-A                                   | Q96A08         |              |              |              |              | 25.82%       |              |

Supplementary Table 2

Total fraction new at end of labeling period - % new (F)

|                                                            |                       | Subject #003 | Subject #004 | Subject #005 | Subject #007 | Subject #009 | Subject #011 |
|------------------------------------------------------------|-----------------------|--------------|--------------|--------------|--------------|--------------|--------------|
|                                                            | <b>Fibrosis Score</b> | <b>3</b>     | <b>0</b>     | <b>2</b>     | <b>1</b>     | <b>4</b>     | <b>0</b>     |
| Histone H2B type 1-B                                       | P33778                | 54.94%       | 27.23%       | 17.79%       | 47.63%       | 21.19%       | 23.46%       |
| Histone H3.1t                                              | Q16695                | 29.73%       | 18.92%       | 6.35%        | 22.39%       | 11.72%       | 9.91%        |
| Histone H3.3                                               | P84243                | 32.61%       | 12.52%       | 15.03%       | 20.92%       | 11.14%       | 14.41%       |
| Histone H4                                                 | P62805                | 44.46%       | 19.22%       | 13.97%       | 34.38%       | 21.86%       | 18.99%       |
| HLA class I histocompatibility antigen, A-1 alpha chain    | P30443                | 104.57%      |              |              |              |              |              |
| HLA class I histocompatibility antigen, A-25 alpha chain   | P18462                | 106.86%      |              |              |              |              |              |
| Homogentisate 1,2-dioxygenase                              | Q93099                |              |              | 39.83%       | 95.44%       |              | 75.36%       |
| Hydroxyacid oxidase 1                                      | Q9UJM8                | 108.55%      | 74.86%       | 75.82%       | 95.38%       |              | 73.12%       |
| Hydroxyacyl-coenzyme A dehydrogenase, mitochondrial        | Q16836                | 89.11%       | 43.51%       | 40.08%       | 72.34%       | 62.53%       | 43.46%       |
| Hydroxymethylglutaryl-CoA synthase, cytoplasmic            | Q01581                |              |              | 62.74%       | 94.04%       |              | 73.28%       |
| Hydroxymethylglutaryl-CoA synthase, mitochondrial          | P54868                | 95.07%       | 65.52%       | 62.92%       | 84.23%       | 98.47%       | 64.91%       |
| Ig alpha-1 chain C region                                  | P01876                |              |              |              |              | 73.25%       |              |
| Ig gamma-1 chain C region                                  | P01857                | 67.12%       | 57.70%       | 18.18%       | 63.15%       | 48.30%       | 47.34%       |
| Ig gamma-2 chain C region                                  | P01859                |              |              |              |              | 41.73%       |              |
| Ig heavy chain V-III region BRO                            | P01766                |              |              |              |              | 59.41%       |              |
| Ig kappa chain C region                                    | P01834                | 63.03%       | 52.24%       | 27.84%       | 49.05%       | 47.88%       | 33.83%       |
| Ig lambda-2 chain C regions                                | P0CG05                |              |              |              |              | 57.67%       |              |
| Immunoglobulin lambda-like polypeptide 5                   | B9A064                |              | 56.71%       |              |              | 61.82%       |              |
| Isochorismatase domain-containing protein 2, mitochondrial | Q96AB3                | 77.79%       | 40.66%       | 35.87%       | 44.40%       |              | 47.26%       |
| Isocitrate dehydrogenase [NADP] cytoplasmic                | O75874                | 110.19%      | 56.22%       | 51.49%       | 80.30%       |              | 51.94%       |
| Isocitrate dehydrogenase [NADP], mitochondrial             | P48735                | 80.92%       | 35.20%       | 43.45%       |              | 61.04%       | 43.95%       |
| Keratin, type I cytoskeletal 10                            | P13645                |              |              |              | 11.99%       |              |              |

Supplementary Table 2

Total fraction new at end of labeling period - % new (F)

|                                                                      |                       | Subject #003 | Subject #004 | Subject #005 | Subject #007 | Subject #009 | Subject #011 |
|----------------------------------------------------------------------|-----------------------|--------------|--------------|--------------|--------------|--------------|--------------|
|                                                                      | <b>Fibrosis Score</b> | <b>3</b>     | <b>0</b>     | <b>2</b>     | <b>1</b>     | <b>4</b>     | <b>0</b>     |
| Keratin, type I cytoskeletal 18                                      | P05783                | 96.59%       | 59.22%       | 52.17%       | 79.83%       | 74.40%       | 63.43%       |
| Keratin, type II cytoskeletal 1                                      | P04264                |              |              |              | 3.51%        |              |              |
| Keratin, type II cytoskeletal 2 epidermal                            | P35908                |              |              |              | 20.05%       |              |              |
| Keratin, type II cytoskeletal 7                                      | P08729                |              |              |              |              | 95.56%       |              |
| Keratin, type II cytoskeletal 8                                      | P05787                | 106.78%      | 67.40%       | 49.77%       | 85.54%       | 82.95%       | 73.75%       |
| Ketohexokinase                                                       | P50053                |              |              | -3.70%       |              |              |              |
| Lambda-crystallin homolog                                            | Q9Y2S2                |              |              | 35.64%       |              |              |              |
| Leukotriene-B(4) omega-hydroxylase 1                                 | P78329                |              | 78.03%       |              |              |              |              |
| Liver carboxylesterase 1                                             | P23141                | 102.43%      | 61.68%       | 55.53%       | 83.31%       | 96.40%       | 67.18%       |
| L-lactate dehydrogenase A-like 6B                                    | Q9BYZ2                |              | 62.39%       | 53.46%       | 78.65%       |              | 46.24%       |
| Long-chain-fatty-acid--CoA ligase 1                                  | P33121                | 69.44%       | 68.04%       | 66.40%       | 74.73%       |              | 61.62%       |
| Lumican                                                              | P51884                |              |              |              |              | 57.45%       | 28.15%       |
| L-xylulose reductase                                                 | Q7Z4W1                | 94.48%       | 53.83%       | 52.59%       | 79.05%       | 75.39%       | 60.26%       |
| Malate dehydrogenase, cytoplasmic                                    | P40925                |              | 55.30%       | 43.80%       | 58.63%       |              | 52.94%       |
| Malate dehydrogenase, mitochondrial                                  | P40926                | 84.10%       | 44.03%       | 46.84%       | 69.83%       | 65.16%       | 42.33%       |
| Maleylacetoacetate isomerase                                         | O43708                |              | 46.69%       | 37.31%       |              |              | 46.21%       |
| Medium-chain specific acyl-CoA dehydrogenase, mitochondrial          | P11310                | 96.44%       | 62.43%       | 77.63%       | 88.80%       |              | 78.87%       |
| Methylmalonate-semialdehyde dehydrogenase [acylating], mitochondrial | Q02252                |              | 56.73%       | 45.74%       | 73.91%       |              | 59.50%       |
| Microfibril-associated glycoprotein 4                                | P55083                |              |              |              |              | 17.15%       |              |
| Microsomal glutathione S-transferase 1                               | P10620                | 79.70%       | 49.84%       | 39.70%       | 71.12%       | 67.23%       | 50.86%       |
| Microsomal triglyceride transfer protein large subunit               | P55157                | 99.42%       | 72.17%       | 63.65%       | 94.45%       |              | 91.38%       |
| Mimecan                                                              | P20774                |              |              |              |              | 16.20%       |              |
| Mitochondrial carrier homolog 2                                      | Q9Y6C9                |              | 49.09%       | 49.90%       | 72.72%       |              | 52.62%       |
| Moesin                                                               | P26038                |              |              |              |              | 93.49%       |              |
| Myoglobin                                                            | P02144                |              |              |              |              |              | 17.05%       |
| Myomesin-2                                                           | P54296                |              |              |              |              |              | 21.00%       |

**Supplementary Table 2**

**Total fraction new at end of labeling period - % new (F)**

|                                                                     |                       | Subject #003 | Subject #004 | Subject #005 | Subject #007 | Subject #009 | Subject #011 |
|---------------------------------------------------------------------|-----------------------|--------------|--------------|--------------|--------------|--------------|--------------|
|                                                                     | <b>Fibrosis Score</b> | <b>3</b>     | <b>0</b>     | <b>2</b>     | <b>1</b>     | <b>4</b>     | <b>0</b>     |
| Myosin light chain 1/3, skeletal muscle isoform                     | P05976                |              |              |              |              |              | 16.24%       |
| Myosin light chain 3                                                | P08590                |              |              |              |              |              | 8.63%        |
| Myosin light chain 6B                                               | P14649                |              |              |              |              | 77.16%       | 49.34%       |
| Myosin light polypeptide 6                                          | P60660                |              | 75.51%       | 71.73%       | 74.01%       | 68.40%       | 73.75%       |
| Myosin regulatory light chain 2, skeletal muscle isoform            | Q96A32                |              |              |              |              |              | 21.25%       |
| Myosin regulatory light chain 2, ventricular/cardiac muscle isoform | P10916                |              |              |              |              |              | 18.24%       |
| Myosin-1                                                            | P12882                |              |              |              |              |              | 19.94%       |
| Myosin-10                                                           | P35580                |              |              |              |              | 73.57%       |              |
| Myosin-11                                                           | P35749                |              |              |              |              | 53.13%       |              |
| Myosin-13                                                           | Q9UKX3                |              |              |              |              |              | 13.61%       |
| Myosin-2                                                            | Q9UKX2                |              |              |              |              |              | 25.48%       |
| Myosin-6                                                            | P13533                |              | -23.23%      |              | 4.93%        |              | 19.11%       |
| Myosin-7                                                            | P12883                |              |              |              |              |              | 20.75%       |
| Myosin-9                                                            | P35579                | 97.98%       | 81.39%       | 79.12%       | 84.15%       | 72.33%       | 74.85%       |
| Myosin-binding protein C, slow-type                                 | Q00872                |              |              |              |              |              | 43.17%       |
| Myozenin-1                                                          | Q9NP98                |              |              |              |              |              | 28.36%       |
| NAD kinase domain-containing protein 1                              | Q4G0N4                |              |              | 8.44%        |              |              |              |
| NAD(P) transhydrogenase, mitochondrial                              | Q13423                |              | 33.51%       | 32.59%       |              |              |              |
| NADH dehydrogenase [ubiquinone] 1 alpha subcomplex subunit 13       | Q9P0J0                |              |              |              | 75.07%       |              |              |
| NADPH--cytochrome P450 reductase                                    | P16435                |              | 92.07%       |              |              |              |              |
| Neutral alpha-glucosidase AB                                        | Q14697                |              |              | 48.06%       |              |              |              |
| Nicotinate phosphoribosyltransferase                                | Q6XQN6                |              |              | 44.45%       |              |              |              |
| Nucleophosmin                                                       | P06748                |              | 49.33%       | 38.91%       |              |              |              |
| Nucleoside diphosphate kinase A                                     | P15531                |              | 60.73%       |              |              | 74.18%       |              |
| Omega-amidase NIT2                                                  | Q9NQR4                |              |              |              | 72.23%       |              |              |
| Ornithine carbamoyltransferase, mitochondrial                       | P00480                |              | 54.02%       | 38.08%       | 83.87%       |              | 56.22%       |

Supplementary Table 2

Total fraction new at end of labeling period - % new (F)

|                                                        |                | Subject #003 | Subject #004 | Subject #005 | Subject #007 | Subject #009 | Subject #011 |
|--------------------------------------------------------|----------------|--------------|--------------|--------------|--------------|--------------|--------------|
|                                                        | Fibrosis Score | 3            | 0            | 2            | 1            | 4            | 0            |
| Peptidyl-prolyl cis-trans isomerase A                  | P62937         |              |              | 91.67%       |              | 88.78%       | 80.71%       |
| Peroxiredoxin-1                                        | Q06830         | 113.55%      | 66.30%       | 51.23%       |              |              | 75.19%       |
| Peroxiredoxin-2                                        | P32119         | 74.30%       | 45.57%       | 41.66%       | 67.81%       |              | 50.46%       |
| Peroxiredoxin-4                                        | Q13162         | 101.43%      | 75.58%       | 59.61%       | 83.33%       |              |              |
| Peroxiredoxin-5, mitochondrial                         | P30044         |              |              | 47.19%       |              |              |              |
| Peroxiredoxin-6                                        | P30041         | 96.97%       | 62.59%       | 49.23%       | 71.85%       | 75.63%       | 55.24%       |
| Peroxisomal acyl-coenzyme A oxidase 2                  | Q99424         |              |              |              | 20.56%       |              |              |
| Peroxisomal bifunctional enzyme                        | Q08426         | 98.60%       | 67.23%       | 67.82%       | 86.31%       | 105.35%      | 73.26%       |
| Peroxisomal membrane protein 2                         | Q9NR77         |              |              |              | 92.93%       |              |              |
| Peroxisomal multifunctional enzyme type 2              | P51659         | 101.43%      | 70.11%       | 70.14%       | 90.40%       |              | 68.51%       |
| Peroxisomal sarcosine oxidase                          | Q9P0Z9         | 64.13%       | 53.52%       | 58.83%       | 85.88%       |              | 61.58%       |
| Peroxisomal trans-2-enoyl-CoA reductase                | Q9BY49         |              | 42.79%       | 50.02%       |              |              |              |
| Phenazine biosynthesis-like domain-containing protein  | P30039         |              | 38.00%       | 40.40%       |              |              |              |
| Phosphate carrier protein, mitochondrial               | Q00325         | 86.50%       | 57.43%       | 45.94%       | 73.58%       | 67.44%       | 47.56%       |
| Phosphatidylethanolamine-binding protein 1             | P30086         | 96.65%       | 60.65%       | 51.33%       | 80.16%       | 82.91%       | 59.73%       |
| Phosphoenolpyruvate carboxykinase [GTP], mitochondrial | Q16822         | 84.05%       | 57.55%       | 49.95%       | 74.45%       | 77.66%       | 57.48%       |
| Phosphoenolpyruvate carboxykinase, cytosolic [GTP]     | P35558         |              | 63.65%       | 62.69%       | 82.29%       |              |              |
| Phosphoglucomutase-1                                   | P36871         | 96.80%       | 54.30%       | 43.81%       | 79.97%       |              | 54.86%       |
| Phosphoglycerate kinase 1                              | P00558         | 97.36%       | 58.09%       | 36.56%       | 68.44%       | 64.62%       | 40.24%       |
| Phosphoglycerate mutase 1                              | P18669         | 95.36%       | 58.60%       | 31.96%       | 71.85%       | 72.21%       | 39.35%       |
| Polypyrimidine tract-binding protein 1                 | P26599         |              | 58.03%       |              |              |              |              |
| Prelamin-A/C                                           | P02545         | 5.43%        | 36.85%       | 23.08%       | 48.53%       | 66.96%       | 27.89%       |
| Profilin-1                                             | P07737         |              | 88.49%       | 80.22%       | 88.36%       | 104.32%      | 87.28%       |
| Prohibitin                                             | P35232         | 96.53%       | 49.02%       | 51.71%       | 86.63%       | 101.28%      | 58.05%       |
| Prohibitin-2                                           | Q99623         | 71.15%       | 46.00%       | 41.55%       | 71.91%       | 18.43%       | 50.26%       |
| Prolargin                                              | P51888         |              |              |              |              | 38.97%       |              |

Supplementary Table 2

Total fraction new at end of labeling period - % new (F)

|                                               |                | Subject #003 | Subject #004 | Subject #005 | Subject #007 | Subject #009 | Subject #011 |
|-----------------------------------------------|----------------|--------------|--------------|--------------|--------------|--------------|--------------|
|                                               | Fibrosis Score | 3            | 0            | 2            | 1            | 4            | 0            |
| Proline dehydrogenase 1, mitochondrial        | O43272         |              |              |              |              | 21.37%       |              |
| Prostaglandin reductase 1                     | Q14914         | 84.92%       | 56.61%       | 46.36%       | 66.97%       | 78.71%       |              |
| Proteasome activator complex subunit 1        | Q06323         |              | 74.50%       |              |              |              |              |
| Proteasome activator complex subunit 2        | Q9UL46         |              | 70.84%       | 58.20%       |              |              | 71.00%       |
| Protein CutA                                  | O60888         |              |              | 7.77%        |              |              |              |
| Protein disulfide-isomerase                   | P07237         | 110.56%      | 71.56%       | 64.98%       | 86.54%       | 100.77%      | 76.72%       |
| Protein disulfide-isomerase A3                | P30101         |              | 71.91%       | 87.76%       | 84.34%       |              | 79.25%       |
| Protein disulfide-isomerase A4                | P13667         |              | 74.31%       | 59.06%       |              |              | 60.18%       |
| Protein disulfide-isomerase A6                | Q15084         | 102.09%      | 66.69%       | 62.34%       | 77.61%       | 98.38%       | 71.46%       |
| Protein DJ-1                                  | Q99497         |              | 61.06%       | 57.94%       |              |              | 55.25%       |
| Protein NipSnap homolog 1                     | Q9BPW8         |              | 49.33%       | 51.90%       | 83.10%       |              | 62.89%       |
| Protein NYNRIN                                | Q9P2P1         | 85.22%       |              | 41.49%       |              |              |              |
| Protein-glutamine gamma-glutamyltransferase 2 | P21980         | 101.47%      | 73.31%       | 56.47%       | 88.70%       | 79.74%       | 68.45%       |
| Pterin-4-alpha-carbinolamine dehydratase      | P61457         |              |              | 49.03%       |              |              |              |
| Putative beta-actin-like protein 3            | Q9BYX7         | 76.53%       | 44.32%       | 40.68%       | 60.75%       | 45.26%       | 28.44%       |
| Putative inactive carboxylesterase 4          | Q9UKY3         | 106.50%      | 68.23%       | 62.41%       | 87.05%       | 97.52%       | 69.07%       |
| Pyruvate carboxylase, mitochondrial           | P11498         | 84.02%       | 52.72%       | 48.42%       | 72.71%       |              | 47.60%       |
| Pyruvate kinase isozymes R/L                  | P30613         |              | 66.91%       | 60.74%       |              |              | 67.13%       |
| Quinone oxidoreductase                        | Q08257         |              | 54.30%       | 56.51%       |              |              | 62.34%       |
| Rab GDP dissociation inhibitor alpha          | P31150         | 99.12%       |              | 57.55%       |              |              | 66.03%       |
| Rab GDP dissociation inhibitor beta           | P50395         |              | 74.85%       | 65.71%       |              |              | 76.39%       |
| Ras GTPase-activating-like protein IQGAP2     | Q13576         |              |              | 59.52%       |              |              |              |
| Receptor expression-enhancing protein 6       | Q96HR9         |              | 80.60%       | 59.88%       | 85.52%       |              |              |
| Retinal dehydrogenase 1                       | P00352         | 97.40%       | 59.75%       | 55.09%       | 84.09%       | 84.25%       | 61.17%       |
| Retinol dehydrogenase 16                      | O75452         |              | 63.16%       | 47.07%       |              |              |              |
| Ribonuclease UK114                            | P52758         | 90.90%       | 57.47%       | 47.12%       | 77.07%       | 72.55%       | 58.10%       |
| Ribose-5-phosphate isomerase                  | P49247         |              |              | 8.50%        |              |              |              |

Supplementary Table 2

Total fraction new at end of labeling period - % new (F)

|                                                                          | Fibrosis Score | Subject #003 | Subject #004 | Subject #005 | Subject #007 | Subject #009 | Subject #011 |
|--------------------------------------------------------------------------|----------------|--------------|--------------|--------------|--------------|--------------|--------------|
|                                                                          |                | 3            | 0            | 2            | 1            | 4            | 0            |
| Sarcoplasmic/endoplasmic reticulum calcium ATPase 1                      | O14983         |              |              |              |              |              | 32.75%       |
| Sarcoplasmic/endoplasmic reticulum calcium ATPase 2                      | P16615         |              |              |              |              |              | 44.23%       |
| Sarcosine dehydrogenase, mitochondrial                                   | Q9UL12         |              |              | 49.87%       |              | 55.01%       |              |
| Selenium-binding protein 1                                               | Q13228         | 100.13%      | 61.51%       | 49.31%       | 71.53%       | 68.26%       | 57.80%       |
| Serine hydroxymethyltransferase, cytosolic                               | P34896         |              | 65.24%       | 54.48%       |              |              | 66.30%       |
| Serine--pyruvate aminotransferase                                        | P21549         | 97.20%       | 70.56%       | 64.00%       | 81.66%       | 88.47%       | 70.00%       |
| Serum albumin                                                            | P02768         | 74.70%       | 42.28%       | 40.74%       | 64.77%       | 34.71%       | 43.65%       |
| Short/branched chain specific acyl-CoA dehydrogenase, mitochondrial      | P45954         |              | 65.41%       | 66.79%       | 87.24%       |              | 72.42%       |
| Short-chain specific acyl-CoA dehydrogenase, mitochondrial               | P16219         |              | 50.51%       | 40.06%       | 71.11%       |              | 46.61%       |
| Sideroflexin-1                                                           | Q9H9B4         |              | 46.26%       | 38.92%       |              |              |              |
| Sorbitol dehydrogenase                                                   | Q00796         |              | 60.02%       | 44.98%       | 81.07%       | 87.07%       | 63.64%       |
| Spectrin alpha chain, brain                                              | Q13813         |              | 70.25%       | 65.02%       | 90.36%       |              | 64.46%       |
| Stress-70 protein, mitochondrial                                         | P38646         | 111.66%      | 81.66%       | 80.74%       | 82.17%       |              | 87.68%       |
| Succinate dehydrogenase [ubiquinone] flavoprotein subunit, mitochondrial | P31040         | 75.76%       | 51.06%       | 52.81%       | 81.00%       | 86.16%       | 58.93%       |
| Succinate-semialdehyde dehydrogenase, mitochondrial                      | P51649         |              | 38.68%       | 40.82%       |              |              | 38.61%       |
| Sulfotransferase 1A1                                                     | P50225         |              |              | 50.45%       | 77.33%       | 69.59%       | 62.08%       |
| Superoxide dismutase [Cu-Zn]                                             | P00441         |              |              | 77.04%       |              |              |              |
| Superoxide dismutase [Mn], mitochondrial                                 | P04179         | 99.13%       | 48.74%       | 50.26%       | 76.52%       | 84.95%       | 61.84%       |
| Talin-1                                                                  | Q9Y490         |              |              | 6.22%        |              |              |              |
| Thioredoxin-dependent peroxide reductase, mitochondrial                  | P30048         | 94.12%       | 59.17%       | 63.42%       | 94.07%       | 73.70%       | 60.16%       |
| Thiosulfate sulfurtransferase                                            | Q16762         | 95.70%       | 61.43%       | 45.45%       | 83.71%       |              | 65.91%       |
| Thymidine phosphorylase                                                  | P19971         | 103.48%      | 64.23%       |              | 81.03%       | 66.82%       | 66.87%       |

**Supplementary Table 2**

**Total fraction new at end of labeling period - % new (F)**

|                                                       |                       | Subject #003 | Subject #004 | Subject #005 | Subject #007 | Subject #009 | Subject #011 |
|-------------------------------------------------------|-----------------------|--------------|--------------|--------------|--------------|--------------|--------------|
|                                                       | <b>Fibrosis Score</b> | <b>3</b>     | <b>0</b>     | <b>2</b>     | <b>1</b>     | <b>4</b>     | <b>0</b>     |
| Titin                                                 | Q8WZ42                |              |              |              |              |              | 28.12%       |
| Transforming growth factor-beta-induced protein ig-h3 | Q15582                |              |              |              |              | 103.62%      |              |
| Transgelin                                            | Q01995                |              |              |              |              | 62.94%       |              |
| Transgelin-2                                          | P37802                |              |              |              |              | 71.02%       |              |
| Transketolase                                         | P29401                |              | 48.87%       |              |              | 47.36%       | 39.44%       |
| Tricarboxylate transport protein, mitochondrial       | P53007                |              |              |              |              |              | 55.27%       |
| Trifunctional enzyme subunit alpha, mitochondrial     | P40939                | 84.65%       | 44.90%       | 37.30%       | 74.26%       | 66.14%       | 46.94%       |
| Trifunctional enzyme subunit beta, mitochondrial      | P55084                |              | 47.70%       | 42.83%       | 78.34%       |              | 51.25%       |
| Triosephosphate isomerase                             | P60174                | 86.29%       | 50.76%       | 41.19%       | 70.87%       | 58.56%       | 45.80%       |
| Tripeptidyl-peptidase 1                               | O14773                |              | 54.05%       | 30.78%       | 69.24%       | 72.00%       |              |
| Tropomyosin alpha-1 chain                             | P09493                |              |              |              | 75.11%       | 50.45%       | 23.08%       |
| Tropomyosin alpha-3 chain                             | P06753                |              |              |              |              |              | 29.78%       |
| Tropomyosin alpha-4 chain                             | P67936                |              |              |              |              | 54.15%       |              |
| Tropomyosin beta chain                                | P07951                |              |              |              |              |              | 20.82%       |
| Troponin C, slow skeletal and cardiac muscles         | P63316                |              |              |              |              |              | 28.16%       |
| Tubulin alpha-1A chain                                | Q71U36                | 88.66%       | 56.89%       | 43.86%       | 75.24%       | 66.14%       | 58.59%       |
| Tubulin alpha-1B chain                                | P68363                | 75.74%       | 46.92%       | 40.63%       | 72.03%       | 58.64%       | 38.13%       |
| Tubulin alpha-4A chain                                | P68366                | 108.81%      | 58.55%       |              | 95.15%       |              | 59.21%       |
| Tubulin beta chain                                    | P07437                |              | 66.06%       | 68.24%       |              |              |              |
| Tubulin beta-2A chain                                 | Q13885                | 98.48%       | 73.68%       | 36.99%       | 64.56%       | 50.43%       | 46.89%       |
| Tubulin beta-3 chain                                  | Q13509                |              |              |              |              |              | 51.47%       |
| Tubulin beta-4A chain                                 | P04350                |              | 65.53%       |              |              |              |              |
| Ubiquitin-60S ribosomal protein L40                   | P62987                | 124.84%      | 93.91%       | 97.14%       | 94.16%       | 111.51%      | 93.48%       |
| UDP-glucose 6-dehydrogenase                           | O60701                |              | 67.65%       | 54.40%       |              |              |              |
| UDP-glucuronosyltransferase 1-1                       | P22309                |              | 64.75%       |              |              |              |              |
| UDP-glucuronosyltransferase 1-10                      | Q9HAW8                |              | 52.52%       |              |              |              | 40.34%       |

Supplementary Table 2

Total fraction new at end of labeling period - % new (F)

|                                                                   |                 | Subject #003 | Subject #004 | Subject #005 | Subject #007 | Subject #009 | Subject #011 |
|-------------------------------------------------------------------|-----------------|--------------|--------------|--------------|--------------|--------------|--------------|
|                                                                   | <b>Fibrosis</b> |              |              |              |              |              |              |
|                                                                   | <b>Score</b>    | <b>3</b>     | <b>0</b>     | <b>2</b>     | <b>1</b>     | <b>4</b>     | <b>0</b>     |
| UDP-glucuronosyltransferase 1-4                                   | P22310          |              | 79.04%       |              |              |              |              |
| UDP-glucuronosyltransferase 2A1                                   | Q9Y4X1          |              |              | 60.70%       | 73.50%       |              | 56.13%       |
| UDP-glucuronosyltransferase 2B15                                  | P54855          |              |              | 89.81%       |              |              |              |
| UDP-glucuronosyltransferase 2B4                                   | P06133          |              |              | 44.70%       |              |              |              |
| UDP-glucuronosyltransferase 2B7                                   | P16662          | 111.36%      | 68.99%       | 66.76%       |              |              | 95.86%       |
| Urocanate hydratase                                               | Q96N76          |              |              | 53.39%       |              |              |              |
| UTP--glucose-1-phosphate uridylyltransferase                      | Q16851          | 103.20%      | 61.15%       | 59.13%       | 86.37%       | 102.06%      | 66.56%       |
| Very long-chain acyl-CoA synthetase                               | O14975          | 114.20%      | 74.30%       | 68.38%       | 89.92%       |              | 77.31%       |
| Very long-chain specific acyl-CoA dehydrogenase,<br>mitochondrial | P49748          |              |              | 72.56%       |              |              | 67.33%       |
| Vimentin                                                          | P08670          | 101.01%      | 63.80%       | 52.31%       | 93.73%       | 56.15%       | 57.56%       |
| Vinculin                                                          | P18206          |              | 35.15%       |              |              | 35.94%       | 33.64%       |
| Voltage-dependent anion-selective channel protein 1               | P21796          |              | 49.24%       |              |              |              |              |

Supplementary Table 2

|                                                 |        | Fractional synthesis rate - % new per day (k) |                 |                 |                 |                 |                 | Protein FSR vs<br>Fibrosis Score (r <sup>2</sup> ) |
|-------------------------------------------------|--------|-----------------------------------------------|-----------------|-----------------|-----------------|-----------------|-----------------|----------------------------------------------------|
|                                                 |        | Subject<br>#003                               | Subject<br>#004 | Subject<br>#005 | Subject<br>#007 | Subject<br>#009 | Subject<br>#011 |                                                    |
| Fibrosis<br>Score                               |        | 3                                             | 0               | 2               | 1               | 4               | 0               |                                                    |
| Liver Proteins                                  |        | Uniprot<br>Accession                          |                 |                 |                 |                 |                 |                                                    |
| 1,4-alpha-glucan-branching enzyme               | Q04446 |                                               |                 | 1.85%           |                 |                 |                 |                                                    |
| 14-3-3 protein epsilon                          | P62258 |                                               |                 |                 |                 |                 | 6.13%           |                                                    |
| 14-3-3 protein eta                              | Q04917 |                                               |                 |                 |                 | 1.92%           | 2.19%           |                                                    |
| 17-beta-hydroxysteroid dehydrogenase 13         | Q7Z5P4 |                                               | 6.47%           | 7.85%           | ≥4.11%          |                 | 6.44%           |                                                    |
| 17-beta-hydroxysteroid dehydrogenase type 6     | O14756 |                                               |                 | 4.93%           | 2.42%           |                 | 6.39%           |                                                    |
| 2,4-dienoyl-CoA reductase, mitochondrial        | Q16698 | ≥6.98%                                        | 3.27%           | 3.61%           | 3.37%           |                 | 4.90%           |                                                    |
| 3-hydroxyacyl-CoA dehydratase 3                 | Q9P035 |                                               |                 | 4.25%           |                 |                 |                 |                                                    |
| 3-hydroxyacyl-CoA dehydrogenase type-2          | Q99714 | 2.26%                                         | 2.52%           | 2.77%           | 1.32%           |                 | 3.05%           |                                                    |
| 3-hydroxyanthranilate 3,4-dioxygenase           | P46952 |                                               |                 | 2.62%           |                 |                 |                 |                                                    |
| 3-ketoacyl-CoA thiolase, mitochondrial          | P42765 | 5.11%                                         | 2.88%           | 3.00%           | 2.72%           | 7.10%           | 3.68%           | 0.69                                               |
| 3-ketoacyl-CoA thiolase, peroxisomal            | P09110 | ≥6.98%                                        | 6.57%           | 5.55%           | 3.35%           | ≥10.47%         | 5.48%           |                                                    |
| 3-mercaptopyruvate sulfurtransferase            | P25325 | ≥6.98%                                        | 3.89%           | 3.90%           | 2.74%           |                 | 4.17%           |                                                    |
| 40S ribosomal protein S7                        | P62081 |                                               | 5.55%           | 4.93%           | 4.03%           |                 | 5.50%           |                                                    |
| 40S ribosomal protein S8                        | P62241 | 0.80%                                         | 0.27%           | 0.28%           | 0.82%           | 1.72%           | 0.44%           | 0.60                                               |
| 40S ribosomal protein SA                        | P08865 | 6.06%                                         | 3.56%           | 3.69%           | 2.42%           | 5.65%           | 3.71%           | 0.60                                               |
| 4-aminobutyrate aminotransferase, mitochondrial | P80404 | ≥6.98%                                        | 3.98%           | 3.28%           | 2.61%           | ≥10.47%         | 4.29%           |                                                    |
| 4-hydroxyphenylpyruvate dioxygenase             | P32754 |                                               | ≥10.47%         | 7.56%           |                 |                 | 7.01%           |                                                    |
| 4-trimethylaminobutyraldehyde dehydrogenase     | P49189 |                                               | 2.81%           | 2.99%           |                 |                 |                 |                                                    |
| 60 kDa heat shock protein, mitochondrial        | P10809 | 6.19%                                         | 3.19%           | 3.02%           | 2.37%           |                 | 3.69%           |                                                    |
| 60S acidic ribosomal protein P0                 | P05388 |                                               |                 | 3.68%           |                 |                 |                 |                                                    |
| 60S ribosomal protein L6                        | Q02878 | 4.76%                                         | 3.27%           | 3.64%           | 2.03%           | 3.65%           | 3.62%           | 0.20                                               |
| 60S ribosomal protein L7                        | P18124 | ≥6.98%                                        |                 |                 |                 |                 |                 |                                                    |
| 78 kDa glucose-regulated protein                | P11021 | ≥6.98%                                        | 6.55%           | 4.91%           | 3.67%           | ≥10.47%         | 7.51%           |                                                    |
| Abhydrolase domain-containing protein 14B       | Q96IU4 |                                               | 6.87%           |                 |                 |                 |                 |                                                    |

Supplementary Table 2

|                                                  |        | Fractional synthesis rate - % new per day (k) |                 |                 |                 |                 |                 | Protein FSR vs<br>Fibrosis Score (r <sup>2</sup> ) |
|--------------------------------------------------|--------|-----------------------------------------------|-----------------|-----------------|-----------------|-----------------|-----------------|----------------------------------------------------|
|                                                  |        | Subject<br>#003                               | Subject<br>#004 | Subject<br>#005 | Subject<br>#007 | Subject<br>#009 | Subject<br>#011 |                                                    |
| Fibrosis<br>Score                                |        | 3                                             | 0               | 2               | 1               | 4               | 0               |                                                    |
| Acetyl-CoA acetyltransferase, cytosolic          | Q9BWD1 |                                               | 3.33%           | 3.74%           | 2.00%           |                 | 7.85%           |                                                    |
| Acetyl-CoA acetyltransferase, mitochondrial      | P24752 | 5.50%                                         | 3.41%           | 2.67%           | 2.76%           | 5.55%           | 3.30%           | 0.57                                               |
| Aconitate hydratase, mitochondrial               | Q99798 |                                               | 5.51%           |                 |                 |                 |                 |                                                    |
| Actin, alpha skeletal muscle                     | P68133 |                                               |                 |                 |                 |                 | 0.47%           |                                                    |
| Actin, aortic smooth muscle                      | P62736 | ≥6.98%                                        | 3.22%           | 3.36%           | 2.29%           | 2.15%           | 0.65%           |                                                    |
| Actin, cytoplasmic 1                             | P60709 | 5.72%                                         | 3.73%           | 3.43%           | 2.41%           | 3.32%           | 3.78%           | 0.07                                               |
| Acyl-coenzyme A synthetase ACSM2A, mitochondrial | Q08AH3 |                                               | 3.67%           | 3.80%           |                 |                 |                 |                                                    |
| Acyl-coenzyme A thioesterase 1                   | Q86TX2 |                                               | 4.22%           |                 |                 |                 | 4.06%           |                                                    |
| Adenylate kinase 2, mitochondrial                | P54819 |                                               | 2.75%           | 3.52%           |                 |                 |                 |                                                    |
| ADP/ATP translocase 1                            | P12235 |                                               | 3.59%           | 5.84%           | 3.46%           |                 | 3.75%           |                                                    |
| Aflatoxin B1 aldehyde reductase member 3         | O95154 |                                               | 6.59%           |                 |                 |                 |                 |                                                    |
| Agmatinase, mitochondrial                        | Q9BSE5 |                                               |                 | 2.05%           |                 |                 |                 |                                                    |
| Alanine aminotransferase 1                       | P24298 |                                               |                 | 1.66%           |                 |                 |                 |                                                    |
| Alcohol dehydrogenase [NADP+]                    | P14550 |                                               |                 | 5.71%           |                 |                 |                 |                                                    |
| Alcohol dehydrogenase 1A                         | P07327 | ≥6.98%                                        | 4.16%           | 2.88%           | 2.73%           | 5.53%           | 3.98%           |                                                    |
| Alcohol dehydrogenase 1B                         | P00325 | ≥6.98%                                        | 4.00%           | 2.58%           | 2.42%           | 8.45%           | 4.10%           |                                                    |
| Alcohol dehydrogenase 1C                         | P00326 | ≥6.98%                                        | 4.31%           |                 | 3.29%           |                 | 4.30%           |                                                    |
| Alcohol dehydrogenase 4                          | P08319 | ≥6.98%                                        | 4.34%           | 3.15%           | 2.57%           | 9.10%           | 4.55%           |                                                    |
| Alcohol dehydrogenase 6                          | P28332 |                                               | 2.87%           | 3.34%           | 2.15%           |                 | 3.84%           |                                                    |
| Alcohol dehydrogenase class-3                    | P11766 |                                               | 2.88%           | 1.95%           |                 |                 |                 |                                                    |
| Aldehyde dehydrogenase family 8 member A1        | Q9H2A2 |                                               | 5.49%           | 4.08%           |                 |                 | 4.46%           |                                                    |
| Aldehyde dehydrogenase X, mitochondrial          | P30837 | ≥6.98%                                        | 4.30%           |                 | ≥4.11%          | ≥10.47%         | 4.54%           |                                                    |
| Aldehyde dehydrogenase, mitochondrial            | P05091 | ≥6.98%                                        | 5.23%           | 4.69%           | 3.24%           | ≥10.47%         | 5.63%           |                                                    |
| Aldehyde oxidase                                 | Q06278 |                                               | 5.56%           | 6.37%           | 3.28%           |                 | 5.03%           |                                                    |
| Aldo-keto reductase family 1 member C1           | Q04828 |                                               | 4.52%           | 3.14%           | 2.08%           | 9.84%           | 3.86%           |                                                    |
| Aldo-keto reductase family 1 member C3           | P42330 |                                               |                 | 3.24%           |                 |                 |                 |                                                    |
| Aldo-keto reductase family 1 member C4           | P17516 |                                               |                 | 3.38%           |                 |                 |                 |                                                    |
| Alpha-1-antitrypsin                              | P01009 |                                               | 6.38%           |                 |                 | ≥10.47%         | 9.53%           |                                                    |

Supplementary Table 2

|                                            |        | Fractional synthesis rate - % new per day (k) |                 |                 |                 |                 |                 | Protein FSR vs<br>Fibrosis Score (r <sup>2</sup> ) |
|--------------------------------------------|--------|-----------------------------------------------|-----------------|-----------------|-----------------|-----------------|-----------------|----------------------------------------------------|
|                                            |        | Subject<br>#003                               | Subject<br>#004 | Subject<br>#005 | Subject<br>#007 | Subject<br>#009 | Subject<br>#011 |                                                    |
| Fibrosis<br>Score                          |        | 3                                             | 0               | 2               | 1               | 4               | 0               |                                                    |
| Alpha-2-macroglobulin                      | P01023 | 5.78%                                         | 4.49%           | 3.97%           | 2.25%           | 6.10%           | 3.44%           | 0.52                                               |
| Alpha-actinin-1                            | P12814 | ≥6.98%                                        | 6.06%           |                 | 3.37%           | 5.19%           | 2.34%           |                                                    |
| Alpha-actinin-2                            | P35609 |                                               |                 |                 |                 |                 | 1.20%           |                                                    |
| Alpha-actinin-4                            | O43707 | 5.43%                                         | 4.02%           | 4.28%           |                 | 4.05%           | 3.18%           |                                                    |
| Alpha-enolase                              | P06733 | ≥6.98%                                        | 4.82%           | 2.75%           | 3.22%           | ≥10.47%         | 5.82%           |                                                    |
| Amine oxidase [flavin-containing] A        | P21397 |                                               | 2.76%           | 2.96%           | 2.09%           |                 |                 |                                                    |
| Amine oxidase [flavin-containing] B        | P27338 | ≥6.98%                                        | 2.97%           | 1.57%           | 3.15%           |                 |                 |                                                    |
| Aminoacylase-1                             | Q03154 |                                               | 4.05%           | 3.52%           | 2.27%           | ≥10.47%         | 5.22%           |                                                    |
| Annexin A1                                 | P04083 |                                               |                 |                 |                 | 5.36%           |                 |                                                    |
| Annexin A2                                 | P07355 |                                               | 3.94%           |                 |                 | 3.69%           | 3.26%           |                                                    |
| Annexin A4                                 | P09525 |                                               |                 |                 |                 | 10.33%          |                 |                                                    |
| Annexin A5                                 | P08758 |                                               | 4.80%           | 5.12%           | 3.11%           | 6.73%           | 4.40%           |                                                    |
| Annexin A6                                 | P08133 | ≥6.98%                                        | 6.62%           | 6.40%           | ≥4.11%          | 9.85%           | 5.87%           |                                                    |
| Apolipoprotein A-I                         | P02647 |                                               |                 |                 |                 | 6.12%           |                 |                                                    |
| Apoptosis-inducing factor 1, mitochondrial | O95831 |                                               | 2.49%           | 1.61%           | 1.92%           |                 | 2.38%           |                                                    |
| Arginase-1                                 | P05089 | 6.41%                                         | 3.62%           | 2.91%           | 2.28%           |                 | 4.06%           |                                                    |
| Argininosuccinate lyase                    | P04424 | 5.48%                                         | 3.83%           | 4.27%           | 1.88%           | 6.43%           | 4.06%           | 0.54                                               |
| Argininosuccinate synthase                 | P00966 |                                               | 4.96%           | 3.49%           | 2.52%           |                 | 6.28%           |                                                    |
| Arylacetamide deacetylase                  | P22760 |                                               |                 |                 |                 |                 | 7.09%           |                                                    |
| Aspartate aminotransferase, cytoplasmic    | P17174 | ≥6.98%                                        | 4.53%           | 3.83%           | 3.26%           |                 | 4.08%           |                                                    |
| Aspartate aminotransferase, mitochondrial  | P00505 | 5.09%                                         | 3.15%           | 2.87%           | 2.38%           | 5.73%           | 2.95%           | 0.70                                               |
| ATP synthase subunit alpha, mitochondrial  | P25705 | ≥6.98%                                        | 3.86%           | 3.73%           | 3.45%           | 6.42%           | 4.03%           |                                                    |
| ATP synthase subunit b, mitochondrial      | P24539 |                                               | 2.73%           |                 | 2.21%           |                 |                 |                                                    |
| ATP synthase subunit beta, mitochondrial   | P06576 | ≥6.98%                                        | 3.05%           | 2.68%           | 3.02%           | 7.42%           | 3.23%           |                                                    |
| ATP synthase subunit delta, mitochondrial  | P30049 |                                               |                 |                 | 3.00%           |                 |                 |                                                    |
| ATP synthase subunit f, mitochondrial      | P56134 |                                               | 2.56%           |                 |                 |                 |                 |                                                    |
| ATP synthase subunit O, mitochondrial      | P48047 | 6.14%                                         | 2.50%           | 6.27%           | 1.57%           |                 | 4.36%           |                                                    |
| ATP-binding cassette sub-family D member 3 | P28288 |                                               | 4.74%           | 4.28%           | 3.01%           |                 | 6.93%           |                                                    |
| Beta-actin-like protein 2                  | Q562R1 |                                               |                 | 2.54%           |                 |                 |                 |                                                    |

**Supplementary Table 2**

**Fractional synthesis rate - % new per day (k)**

|                                                                              |                           | Subject<br>#003 | Subject<br>#004 | Subject<br>#005 | Subject<br>#007 | Subject<br>#009 | Subject<br>#011 | Protein FSR vs<br>Fibrosis Score (r <sup>2</sup> ) |
|------------------------------------------------------------------------------|---------------------------|-----------------|-----------------|-----------------|-----------------|-----------------|-----------------|----------------------------------------------------|
|                                                                              | <b>Fibrosis<br/>Score</b> | <b>3</b>        | <b>0</b>        | <b>2</b>        | <b>1</b>        | <b>4</b>        | <b>0</b>        |                                                    |
| Beta-enolase                                                                 | P13929                    |                 |                 |                 |                 |                 | 3.59%           |                                                    |
| Betaine--homocysteine S-methyltransferase 1                                  | Q93088                    | ≥6.98%          | 4.70%           | 3.98%           | 2.93%           |                 | 4.94%           |                                                    |
| Betaine--homocysteine S-methyltransferase 2                                  | Q9H2M3                    |                 |                 | 4.49%           |                 |                 | 3.40%           |                                                    |
| Bifunctional ATP-dependent dihydroxyacetone kinase/FAD-AMP lyase (cyclizing) | Q3LXA3                    | ≥6.98%          | 3.84%           | 3.93%           | 2.25%           |                 | 4.05%           |                                                    |
| Biglycan                                                                     | P21810                    |                 |                 |                 |                 | 1.80%           |                 |                                                    |
| Bile acid-CoA:amino acid N-acyltransferase                                   | Q14032                    |                 | 4.08%           | 2.67%           |                 |                 | 6.38%           |                                                    |
| Bile acyl-CoA synthetase                                                     | Q9Y2P5                    |                 | 6.26%           | 4.28%           | 3.42%           |                 | 5.82%           |                                                    |
| Bile salt sulfotransferase                                                   | Q06520                    | ≥6.98%          | 4.43%           | 3.96%           | 3.19%           |                 | 4.94%           |                                                    |
| C-1-tetrahydrofolate synthase, cytoplasmic                                   | P11586                    | 3.90%           | 3.30%           | 2.67%           | 1.58%           |                 | 4.21%           |                                                    |
| Calcium-binding mitochondrial carrier protein Aralar1                        | O75746                    |                 | 2.87%           |                 | 1.78%           |                 | 3.33%           |                                                    |
| Calcium-binding mitochondrial carrier protein Aralar2                        | Q9UJS0                    | 6.12%           | 2.80%           | 2.13%           | 2.51%           |                 | 3.60%           |                                                    |
| Caldesmon                                                                    | Q05682                    |                 |                 |                 |                 | 7.57%           |                 |                                                    |
| Calmodulin                                                                   | P62158                    |                 |                 |                 |                 | ≥10.47%         | 10.61%          |                                                    |
| Calnexin                                                                     | P27824                    | ≥6.98%          | 6.22%           | 5.14%           |                 |                 | 5.78%           |                                                    |
| Calreticulin                                                                 | P27797                    | ≥6.98%          | 5.01%           | 4.77%           | 2.54%           | 8.55%           | 6.04%           |                                                    |
| Calsequestrin-1                                                              | P31415                    |                 |                 |                 |                 |                 | 0.79%           |                                                    |
| Carbamoyl-phosphate synthase [ammonia], mitochondrial                        | P31327                    | 6.33%           | 2.95%           | 2.71%           | 2.63%           | 7.33%           | 3.40%           | 0.70                                               |
| Carbonic anhydrase 1                                                         | P00915                    |                 |                 | 1.54%           |                 | 4.01%           |                 |                                                    |
| Carbonic anhydrase 2                                                         | P00918                    | 6.76%           | 3.91%           | 3.06%           | 2.54%           | 6.09%           | 3.81%           | 0.49                                               |
| Carbonic anhydrase 3                                                         | P07451                    |                 |                 |                 | 3.70%           |                 | 1.20%           |                                                    |
| Carbonyl reductase [NADPH] 1                                                 | P16152                    | ≥6.98%          | 4.06%           | 3.73%           | 2.28%           | 6.68%           | 4.20%           |                                                    |
| Catalase                                                                     | P04040                    | ≥6.98%          | 4.95%           | 5.37%           | 3.21%           | 7.67%           | 5.76%           |                                                    |
| Cathepsin D                                                                  | P07339                    | ≥6.98%          | 5.22%           | 4.35%           | 3.63%           | ≥10.47%         | 6.59%           |                                                    |
| Clathrin heavy chain 1                                                       | Q00610                    |                 |                 |                 |                 |                 | 5.03%           |                                                    |
| Cocaine esterase                                                             | O00748                    |                 | 2.94%           | 2.08%           |                 |                 |                 |                                                    |

**Supplementary Table 2**

|                                                  |        | Fractional synthesis rate - % new per day (k) |                 |                 |                 |                 |                 | Protein FSR vs<br>Fibrosis Score (r <sup>2</sup> ) |
|--------------------------------------------------|--------|-----------------------------------------------|-----------------|-----------------|-----------------|-----------------|-----------------|----------------------------------------------------|
|                                                  |        | Subject<br>#003                               | Subject<br>#004 | Subject<br>#005 | Subject<br>#007 | Subject<br>#009 | Subject<br>#011 |                                                    |
| Fibrosis<br>Score                                |        | 3                                             | 0               | 2               | 1               | 4               | 0               |                                                    |
| Cofilin-1                                        | P23528 |                                               |                 | 1.68%           |                 | 7.14%           |                 |                                                    |
| Collagen alpha-1(I) chain                        | P02452 | 0.63%                                         | 0.20%           | 0.39%           | 0.23%           | 0.56%           | 0.32%           | 0.79                                               |
| Collagen alpha-1(III) chain                      | P02461 | 0.59%                                         | 0.25%           | 0.24%           | 0.18%           | 0.42%           | 0.33%           | 0.38                                               |
| Collagen alpha-1(IV) chain                       | P02462 |                                               |                 | 0.09%           |                 | 0.93%           |                 |                                                    |
| Collagen alpha-1(VI) chain                       | P12109 | 1.30%                                         | 0.82%           | 0.95%           | 0.75%           | 1.14%           | 0.88%           | 0.66                                               |
| Collagen alpha-1(XIV) chain                      | Q05707 |                                               |                 |                 |                 | 2.19%           |                 |                                                    |
| Collagen alpha-2(I) chain                        | P08123 | 0.66%                                         | 0.41%           | 0.49%           | 0.24%           | 0.56%           | 0.42%           | 0.48                                               |
| Collagen alpha-3(VI) chain                       | P12111 | 1.00%                                         | 1.28%           | 0.66%           | 0.52%           | 0.94%           | 1.02%           | 0.04                                               |
| Complement C3                                    | P01024 |                                               | ≥10.47%         |                 | 3.04%           |                 |                 |                                                    |
| Complement C4-A                                  | P0C0L4 |                                               | 7.83%           |                 |                 |                 |                 |                                                    |
| Corticosteroid 11-beta-dehydrogenase isozyme 1   | P28845 |                                               | 7.09%           |                 |                 |                 |                 |                                                    |
| Creatine kinase M-type                           | P06732 |                                               |                 |                 |                 |                 | 0.85%           |                                                    |
| Creatine kinase S-type, mitochondrial            | P17540 |                                               |                 |                 |                 |                 | 2.43%           |                                                    |
| Cullin-associated NEDD8-dissociated protein 1    | Q86VP6 |                                               | 3.20%           | 3.22%           |                 |                 |                 |                                                    |
| Cystathionine gamma-lyase                        | P32929 | ≥6.98%                                        | 6.38%           | 4.10%           | ≥4.11%          |                 | 5.28%           |                                                    |
| Cytochrome b5                                    | P00167 | ≥6.98%                                        | 4.83%           | 4.23%           | 3.37%           | 10.23%          | 5.40%           |                                                    |
| Cytochrome b-c1 complex subunit 2, mitochondrial | P22695 |                                               |                 |                 |                 |                 | 4.04%           |                                                    |
| Cytochrome c oxidase subunit 2                   | P00403 | 5.82%                                         | 3.90%           | 2.84%           | ≥4.11%          | 7.70%           | 3.82%           |                                                    |
| Cytochrome c oxidase subunit 5A, mitochondrial   | P20674 |                                               | 2.50%           | 2.15%           | 1.88%           |                 | 2.59%           |                                                    |
| Cytochrome P450 1A2                              | P05177 |                                               | 6.02%           |                 | 1.88%           |                 |                 |                                                    |
| Cytochrome P450 2A6                              | P11509 |                                               | ≥10.47%         |                 |                 |                 |                 |                                                    |
| Cytochrome P450 2C8                              | P10632 |                                               | ≥10.47%         | ≥11.51%         |                 |                 |                 |                                                    |
| Cytochrome P450 2C9                              | P11712 | ≥6.98%                                        | 8.33%           | 4.98%           | 3.51%           |                 | 7.87%           |                                                    |
| Cytochrome P450 2E1                              | P05181 |                                               |                 |                 | 3.46%           |                 |                 |                                                    |
| Cytochrome P450 3A4                              | P08684 |                                               |                 | 7.08%           |                 |                 |                 |                                                    |
| Cytochrome P450 3A5                              | P20815 |                                               | 6.66%           |                 | 2.53%           | ≥10.47%         | 7.08%           |                                                    |

**Supplementary Table 2**

|                                                                             |        | Fractional synthesis rate - % new per day (k) |                 |                 |                 |                 |                 | Protein FSR vs<br>Fibrosis Score (r <sup>2</sup> ) |
|-----------------------------------------------------------------------------|--------|-----------------------------------------------|-----------------|-----------------|-----------------|-----------------|-----------------|----------------------------------------------------|
|                                                                             |        | Subject<br>#003                               | Subject<br>#004 | Subject<br>#005 | Subject<br>#007 | Subject<br>#009 | Subject<br>#011 |                                                    |
| Fibrosis<br>Score                                                           |        | 3                                             | 0               | 2               | 1               | 4               | 0               |                                                    |
| Cytoplasmic aconitate hydratase                                             | P21399 |                                               | 4.29%           | 3.76%           | 2.97%           |                 |                 |                                                    |
| Cytosol aminopeptidase                                                      | P28838 |                                               | 5.07%           |                 |                 |                 | 6.42%           |                                                    |
| Cytosolic 10-formyltetrahydrofolate dehydrogenase                           | O75891 |                                               | 3.48%           | 4.70%           | ≥4.11%          |                 | 4.13%           |                                                    |
| Cytosolic non-specific dipeptidase                                          | Q96KP4 | 3.75%                                         | 3.85%           | 1.86%           |                 |                 | 7.86%           |                                                    |
| D-beta-hydroxybutyrate dehydrogenase,<br>mitochondrial                      | Q02338 | ≥6.98%                                        | 3.01%           | 4.26%           |                 |                 | 3.52%           |                                                    |
| D-dopachrome decarboxylase                                                  | P30046 |                                               | 4.21%           | 3.26%           | 3.02%           | 7.61%           | 4.45%           |                                                    |
| Delta(3,5)-Delta(2,4)-dienoyl-CoA isomerase,<br>mitochondrial               | Q13011 | 6.46%                                         | 3.14%           |                 | 2.48%           | 6.05%           | 4.04%           |                                                    |
| Delta-1-pyrroline-5-carboxylate dehydrogenase,<br>mitochondrial             | P30038 | ≥6.98%                                        | 3.66%           | 3.55%           | 3.23%           | 3.11%           | 4.29%           |                                                    |
| Delta-aminolevulinic acid dehydratase                                       | P13716 |                                               |                 | 2.33%           |                 |                 |                 |                                                    |
| Desmin                                                                      | P17661 |                                               |                 |                 |                 | 4.36%           | 4.60%           |                                                    |
| Dihydropyrimidinase                                                         | Q14117 |                                               |                 | 4.85%           | ≥4.11%          |                 | 5.75%           |                                                    |
| Dimethylaniline monooxygenase [N-oxide-forming] 3                           | P31513 |                                               | 5.42%           | 4.00%           | 2.70%           |                 |                 |                                                    |
| Dimethylglycine dehydrogenase, mitochondrial                                | Q9UI17 |                                               | 3.06%           | 4.94%           |                 |                 |                 |                                                    |
| Dolichyl-diphosphooligosaccharide--protein<br>glycosyltransferase subunit 1 | P04843 | 6.82%                                         | 3.23%           |                 | 2.16%           |                 |                 |                                                    |
| Dolichyl-diphosphooligosaccharide--protein<br>glycosyltransferase subunit 2 | P04844 |                                               | 4.90%           | 3.96%           | 2.51%           |                 | 3.89%           |                                                    |
| Elastin                                                                     | P15502 |                                               |                 |                 |                 | 0.37%           |                 |                                                    |
| Electron transfer flavoprotein subunit alpha,<br>mitochondrial              | P13804 | 6.93%                                         | 3.11%           | 3.08%           | 2.54%           | 6.87%           | 3.27%           | 0.71                                               |
| Electron transfer flavoprotein subunit beta                                 | P38117 | 3.37%                                         | 3.01%           | 2.79%           | 3.41%           |                 | 4.30%           |                                                    |
| Electron transfer flavoprotein-ubiquinone<br>oxidoreductase, mitochondrial  | Q16134 |                                               | 5.26%           | 4.53%           |                 |                 | 6.95%           |                                                    |

**Supplementary Table 2**

|                                                                   |        | Fractional synthesis rate - % new per day (k) |                 |                 |                 |                 |                 | Protein FSR vs<br>Fibrosis Score (r <sup>2</sup> ) |
|-------------------------------------------------------------------|--------|-----------------------------------------------|-----------------|-----------------|-----------------|-----------------|-----------------|----------------------------------------------------|
|                                                                   |        | Subject<br>#003                               | Subject<br>#004 | Subject<br>#005 | Subject<br>#007 | Subject<br>#009 | Subject<br>#011 |                                                    |
| Fibrosis<br>Score                                                 |        | 3                                             | 0               | 2               | 1               | 4               | 0               |                                                    |
| Elongation factor 1-alpha 1                                       | P68104 | ≥6.98%                                        | 4.39%           | 4.09%           | 2.09%           | 6.76%           | 3.81%           |                                                    |
| Elongation factor 2                                               | P13639 |                                               | 8.68%           | 6.94%           |                 |                 |                 |                                                    |
| Endoplasmic                                                       | P14625 | ≥6.98%                                        | 6.01%           | 5.32%           | 3.78%           | ≥10.47%         | 7.14%           |                                                    |
| Enoyl-CoA hydratase domain-containing protein 2,<br>mitochondrial | Q86YB7 |                                               | 3.47%           | 4.35%           | ≥4.11%          |                 | 7.76%           |                                                    |
| Enoyl-CoA hydratase, mitochondrial                                | P30084 | 6.06%                                         | 2.71%           | 2.71%           | 2.29%           | 5.88%           | 3.20%           | 0.67                                               |
| Epoxide hydrolase 1                                               | P07099 | ≥6.98%                                        | 4.61%           | 3.75%           | 3.11%           | 9.09%           | 5.18%           |                                                    |
| Epoxide hydrolase 2                                               | P34913 |                                               | 5.10%           | 3.73%           | 2.94%           |                 | 6.35%           |                                                    |
| Ester hydrolase C11orf54                                          | Q9H0W9 |                                               | 3.61%           | 5.69%           |                 |                 |                 |                                                    |
| Estradiol 17-beta-dehydrogenase 11                                | Q8NBQ5 |                                               |                 | 4.96%           |                 |                 |                 |                                                    |
| Fatty acid synthase                                               | P49327 | ≥6.98%                                        | 9.13%           | ≥11.51%         | 2.82%           |                 | 8.19%           |                                                    |
| Fatty acid-binding protein, liver                                 | P07148 | ≥6.98%                                        | 6.04%           | 3.23%           | 2.74%           | 8.22%           | 4.26%           |                                                    |
| Ferritin light chain                                              | P02792 | ≥6.98%                                        | 5.53%           | 7.45%           | 3.25%           | ≥10.47%         | 5.02%           |                                                    |
| Fibronectin                                                       | P02751 | ≥6.98%                                        | 4.26%           |                 |                 | 7.76%           | 7.77%           |                                                    |
| Filamin-A                                                         | P21333 |                                               |                 |                 | ≥4.11%          | 3.51%           | 7.70%           |                                                    |
| Filamin-B                                                         | O75369 |                                               |                 | 4.67%           |                 |                 |                 |                                                    |
| Filamin-C                                                         | Q14315 |                                               |                 |                 |                 |                 | 1.46%           |                                                    |
| Flavin reductase (NADPH)                                          | P30043 |                                               | 3.48%           | 3.94%           | 2.14%           |                 | 5.03%           |                                                    |
| Formimidoyltransferase-cyclodeaminase                             | O95954 | ≥6.98%                                        | 4.42%           | 3.93%           | 2.94%           | 9.32%           | 4.36%           |                                                    |
| Fructose-1,6-bisphosphatase 1                                     | P09467 | ≥6.98%                                        | 5.22%           | 3.69%           | 3.62%           | 7.44%           | 5.01%           |                                                    |
| Fructose-bisphosphate aldolase A                                  | P04075 |                                               |                 |                 |                 |                 | 2.60%           |                                                    |
| Fructose-bisphosphate aldolase B                                  | P05062 | ≥6.98%                                        | 6.71%           | 5.38%           | 3.31%           | ≥10.47%         | 6.47%           |                                                    |
| Fumarate hydratase, mitochondrial                                 | P07954 |                                               | 3.20%           | 3.03%           | 2.60%           |                 | 3.40%           |                                                    |
| Fumarylacetoacetase                                               | P16930 | 6.95%                                         | 3.79%           | 2.80%           | 2.22%           | 5.44%           | 3.31%           | 0.43                                               |
| Galactokinase                                                     | P51570 |                                               | 3.17%           | 2.73%           |                 |                 | 3.41%           |                                                    |
| Galectin-1                                                        | P09382 |                                               |                 |                 |                 | 4.05%           | 4.50%           |                                                    |
| Gamma-glutamyltransferase 5                                       | P36269 | ≥6.98%                                        |                 | 4.37%           |                 | 4.26%           |                 |                                                    |
| Gelsolin                                                          | P06396 |                                               | 3.93%           | 5.21%           |                 |                 |                 |                                                    |
| Glucose-6-phosphate isomerase                                     | P06744 | 4.49%                                         | 3.35%           | 3.02%           | 2.54%           | 5.84%           | 3.35%           | 0.62                                               |

**Supplementary Table 2**

|                                                           |        | Fractional synthesis rate - % new per day (k) |                 |                 |                 |                 |                 | Protein FSR vs<br>Fibrosis Score (r <sup>2</sup> ) |
|-----------------------------------------------------------|--------|-----------------------------------------------|-----------------|-----------------|-----------------|-----------------|-----------------|----------------------------------------------------|
|                                                           |        | Subject<br>#003                               | Subject<br>#004 | Subject<br>#005 | Subject<br>#007 | Subject<br>#009 | Subject<br>#011 |                                                    |
| Fibrosis<br>Score                                         |        | 3                                             | 0               | 2               | 1               | 4               | 0               |                                                    |
| Glutamate dehydrogenase 1, mitochondrial                  | P00367 | 6.24%                                         | 2.62%           | 2.42%           | 2.62%           |                 | 2.71%           |                                                    |
| Glutathione S-transferase A1                              | P08263 | ≥6.98%                                        | 3.99%           | 2.68%           | 2.45%           | 9.25%           | 4.08%           |                                                    |
| Glutathione S-transferase kappa 1                         | Q9Y2Q3 |                                               | 5.17%           |                 |                 |                 | 6.51%           |                                                    |
| Glutathione S-transferase Mu 1                            | P09488 | ≥6.98%                                        |                 | 3.71%           | 1.93%           |                 | 5.01%           |                                                    |
| Glutathione S-transferase omega-1                         | P78417 |                                               |                 | 2.21%           |                 |                 |                 |                                                    |
| Glyceraldehyde-3-phosphate dehydrogenase                  | P04406 | ≥6.98%                                        | 4.12%           | 3.49%           | 2.80%           | 4.67%           | 3.33%           |                                                    |
| Glycerol-3-phosphate dehydrogenase [NAD+],<br>cytoplasmic | P21695 |                                               | 4.19%           | 3.11%           |                 |                 |                 |                                                    |
| Glycine amidinotransferase, mitochondrial                 | P50440 | ≥6.98%                                        | 5.47%           | 5.72%           | 3.03%           | ≥10.47%         | 5.26%           |                                                    |
| Glycine dehydrogenase [decarboxylating],<br>mitochondrial | P23378 |                                               |                 | 0.87%           |                 |                 |                 |                                                    |
| Glycogen debranching enzyme                               | P35573 |                                               |                 | 1.11%           |                 |                 | 2.11%           |                                                    |
| Glycogen phosphorylase, brain form                        | P11216 |                                               |                 |                 |                 |                 | 2.26%           |                                                    |
| Glycogen phosphorylase, liver form                        | P06737 | 4.28%                                         | 2.89%           | 1.80%           | 1.66%           |                 | 1.85%           |                                                    |
| Glycogen phosphorylase, muscle form                       | P11217 |                                               |                 |                 |                 |                 | 1.48%           |                                                    |
| Glyoxylate reductase/hydroxypyruvate reductase            | Q9UBQ7 | 6.29%                                         | 3.83%           | 3.10%           | 2.39%           | 6.48%           | 3.83%           | 0.55                                               |
| Heat shock 70 kDa protein 1A/1B                           | P08107 |                                               | 6.01%           | 5.90%           |                 | 5.89%           | 4.30%           |                                                    |
| Heat shock cognate 71 kDa protein                         | P11142 |                                               | 7.48%           |                 | 4.10%           |                 |                 |                                                    |
| Heat shock protein beta-1                                 | P04792 | ≥6.98%                                        | 5.36%           | 5.05%           | 2.93%           | 6.61%           | 4.20%           |                                                    |
| Heat shock-related 70 kDa protein 2                       | P54652 |                                               |                 | 4.50%           | 3.82%           |                 | 8.35%           |                                                    |
| Hemoglobin subunit alpha                                  | P69905 | 1.10%                                         | 0.49%           | 0.65%           | 0.83%           | 2.36%           | 0.60%           | 0.72                                               |
| Hemoglobin subunit beta                                   | P68871 | 1.04%                                         | 0.46%           | 0.34%           | 0.89%           | 2.09%           | 0.74%           | 0.55                                               |
| Hemoglobin subunit delta                                  | P02042 | 1.52%                                         | 1.03%           | 1.49%           | 1.40%           | 3.24%           | 1.14%           | 0.70                                               |
| Hemoglobin subunit gamma-1                                | P69891 |                                               |                 | 0.85%           |                 |                 |                 |                                                    |
| Heterogeneous nuclear ribonucleoprotein K                 | P61978 | ≥6.98%                                        | 6.79%           | 11.01%          |                 | ≥10.47%         |                 |                                                    |
| Histone H2A type 1-A                                      | Q96QV6 |                                               | 2.01%           | 1.40%           | 1.31%           | 1.64%           | 1.61%           |                                                    |
| Histone H2A type 1-B/E                                    | P04908 | 2.40%                                         | 1.42%           | 0.55%           | 0.97%           | 1.27%           | 1.09%           | 0.09                                               |
| Histone H2B type 1-A                                      | Q96A08 |                                               |                 |                 |                 | 1.36%           |                 |                                                    |

**Supplementary Table 2**

|                                                            |        | Fractional synthesis rate - % new per day (k) |                 |                 |                 |                 |                 | Protein FSR vs<br>Fibrosis Score (r <sup>2</sup> ) |
|------------------------------------------------------------|--------|-----------------------------------------------|-----------------|-----------------|-----------------|-----------------|-----------------|----------------------------------------------------|
|                                                            |        | Subject<br>#003                               | Subject<br>#004 | Subject<br>#005 | Subject<br>#007 | Subject<br>#009 | Subject<br>#011 |                                                    |
| Fibrosis<br>Score                                          |        | 3                                             | 0               | 2               | 1               | 4               | 0               |                                                    |
| Histone H2B type 1-B                                       | P33778 | 2.42%                                         | 1.44%           | 0.98%           | 1.15%           | 1.08%           | 1.27%           | 0.03                                               |
| Histone H3.1t                                              | Q16695 | 1.07%                                         | 0.95%           | 0.33%           | 0.45%           | 0.57%           | 0.50%           | 0.00                                               |
| Histone H3.3                                               | P84243 | 1.20%                                         | 0.61%           | 0.81%           | 0.42%           | 0.54%           | 0.74%           | 0.07                                               |
| Histone H4                                                 | P62805 | 1.78%                                         | 0.97%           | 0.75%           | 0.75%           | 1.12%           | 1.00%           | 0.22                                               |
| HLA class I histocompatibility antigen, A-1 alpha chain    | P30443 | ≥6.98%                                        |                 |                 |                 |                 |                 |                                                    |
| HLA class I histocompatibility antigen, A-25 alpha chain   | P18462 | ≥6.98%                                        |                 |                 |                 |                 |                 |                                                    |
| Homogentisate 1,2-dioxygenase                              | Q93099 |                                               |                 | 2.54%           | ≥4.11%          |                 | 6.67%           |                                                    |
| Hydroxyacid oxidase 1                                      | Q9UJM8 | ≥6.98%                                        | 6.28%           | 7.10%           | ≥4.11%          |                 | 6.26%           |                                                    |
| Hydroxyacyl-coenzyme A dehydrogenase, mitochondrial        | Q16836 | 6.72%                                         | 2.60%           | 2.56%           | 2.29%           | 4.46%           | 2.71%           | 0.48                                               |
| Hydroxymethylglutaryl-CoA synthase, cytoplasmic            | Q01581 |                                               |                 | 4.94%           | ≥4.11%          |                 | 6.29%           |                                                    |
| Hydroxymethylglutaryl-CoA synthase, mitochondrial          | P54868 | ≥6.98%                                        | 4.84%           | 4.96%           | 3.30%           | ≥10.47%         | 4.99%           |                                                    |
| Ig alpha-1 chain C region                                  | P01876 |                                               |                 |                 |                 | 5.99%           |                 |                                                    |
| Ig gamma-1 chain C region                                  | P01857 | 3.37%                                         | 3.91%           | 1.00%           | 1.78%           | 3.00%           | 3.05%           | 0.01                                               |
| Ig gamma-2 chain C region                                  | P01859 |                                               |                 |                 |                 | 2.46%           |                 |                                                    |
| Ig heavy chain V-III region BRO                            | P01766 |                                               |                 |                 |                 | 4.10%           |                 |                                                    |
| Ig kappa chain C region                                    | P01834 | 3.02%                                         | 3.36%           | 1.63%           | 1.20%           | 2.96%           | 1.97%           | 0.06                                               |
| Ig lambda-2 chain C regions                                | P0CG05 |                                               |                 |                 |                 | 3.91%           |                 |                                                    |
| Immunoglobulin lambda-like polypeptide 5                   | B9A064 |                                               | 3.81%           |                 |                 | 4.38%           |                 |                                                    |
| Isochorismatase domain-containing protein 2, mitochondrial | Q96AB3 | 4.56%                                         | 2.37%           | 2.22%           | 1.05%           |                 | 3.05%           |                                                    |
| Isocitrate dehydrogenase [NADP] cytoplasmic                | O75874 | ≥6.98%                                        | 3.75%           | 3.62%           | 2.90%           |                 | 3.49%           |                                                    |
| Isocitrate dehydrogenase [NADP], mitochondrial             | P48735 | 5.02%                                         | 1.97%           | 2.85%           |                 | 4.28%           | 2.76%           |                                                    |
| Keratin, type I cytoskeletal 10                            | P13645 |                                               |                 |                 | 0.23%           |                 |                 |                                                    |

**Supplementary Table 2**

|                                                                         |        | Fractional synthesis rate - % new per day (k) |                 |                 |                 |                 |                 | Protein FSR vs<br>Fibrosis Score (r <sup>2</sup> ) |
|-------------------------------------------------------------------------|--------|-----------------------------------------------|-----------------|-----------------|-----------------|-----------------|-----------------|----------------------------------------------------|
|                                                                         |        | Subject<br>#003                               | Subject<br>#004 | Subject<br>#005 | Subject<br>#007 | Subject<br>#009 | Subject<br>#011 |                                                    |
| <b>Fibrosis<br/>Score</b>                                               |        | <b>3</b>                                      | <b>0</b>        | <b>2</b>        | <b>1</b>        | <b>4</b>        | <b>0</b>        |                                                    |
| Keratin, type I cytoskeletal 18                                         | P05783 | ≥6.98%                                        | 4.08%           | 3.69%           | 2.86%           | 6.19%           | 4.79%           |                                                    |
| Keratin, type II cytoskeletal 1                                         | P04264 |                                               |                 |                 | 0.06%           |                 |                 |                                                    |
| Keratin, type II cytoskeletal 2 epidermal                               | P35908 |                                               |                 |                 | 0.40%           |                 |                 |                                                    |
| Keratin, type II cytoskeletal 7                                         | P08729 |                                               |                 |                 |                 | ≥10.47%         |                 |                                                    |
| Keratin, type II cytoskeletal 8                                         | P05787 | ≥6.98%                                        | 5.10%           | 3.44%           | 3.45%           | 8.04%           | 6.37%           |                                                    |
| Ketohexokinase                                                          | P50053 |                                               |                 | -0.18%          |                 |                 |                 |                                                    |
| Lambda-crystallin homolog                                               | Q9Y2S2 |                                               |                 | 2.20%           |                 |                 |                 |                                                    |
| Leukotriene-B(4) omega-hydroxylase 1                                    | P78329 |                                               | 6.89%           |                 |                 |                 |                 |                                                    |
| Liver carboxylesterase 1                                                | P23141 | ≥6.98%                                        | 4.36%           | 4.05%           | 3.20%           | ≥10.47%         | 5.31%           |                                                    |
| L-lactate dehydrogenase A-like 6B                                       | Q9BYZ2 |                                               | 4.45%           | 3.82%           | 2.76%           |                 | 2.96%           |                                                    |
| Long-chain-fatty-acid--CoA ligase 1                                     | P33121 | 3.59%                                         | 5.19%           | 5.45%           | 2.46%           |                 | 4.56%           |                                                    |
| Lumican                                                                 | P51884 |                                               |                 |                 |                 | 3.88%           | 1.57%           |                                                    |
| L-xylulose reductase                                                    | Q7Z4W1 | ≥6.98%                                        | 3.51%           | 3.73%           | 2.79%           | 6.37%           | 4.39%           |                                                    |
| Malate dehydrogenase, cytoplasmic                                       | P40925 |                                               | 3.66%           | 2.88%           | 1.58%           |                 | 3.59%           |                                                    |
| Malate dehydrogenase, mitochondrial                                     | P40926 | 5.57%                                         | 2.64%           | 3.16%           | 2.14%           | 4.79%           | 2.62%           | 0.71                                               |
| Maleylacetoacetate isomerase                                            | O43708 |                                               | 2.86%           | 2.34%           |                 |                 | 2.95%           |                                                    |
| Medium-chain specific acyl-CoA dehydrogenase,<br>mitochondrial          | P11310 | ≥6.98%                                        | 4.45%           | 7.49%           | 3.91%           |                 | 7.40%           |                                                    |
| Methylmalonate-semialdehyde dehydrogenase<br>[acylating], mitochondrial | Q02252 |                                               | 3.81%           | 3.06%           | 2.40%           |                 | 4.30%           |                                                    |
| Microfibril-associated glycoprotein 4                                   | P55083 |                                               |                 |                 |                 | 0.86%           |                 |                                                    |
| Microsomal glutathione S-transferase 1                                  | P10620 | 4.83%                                         | 3.14%           | 2.53%           | 2.22%           | 5.07%           | 3.38%           | 0.49                                               |
| Microsomal triglyceride transfer protein large subunit                  | P55157 | ≥6.98%                                        | 5.81%           | 5.06%           | ≥4.11%          |                 | ≥10.96%         |                                                    |
| Mimecan                                                                 | P20774 |                                               |                 |                 |                 | 0.80%           |                 |                                                    |
| Mitochondrial carrier homolog 2                                         | Q9Y6C9 |                                               | 3.07%           | 3.46%           | 2.32%           |                 | 3.56%           |                                                    |
| Moesin                                                                  | P26038 |                                               |                 |                 |                 | ≥10.47%         |                 |                                                    |
| Myoglobin                                                               | P02144 |                                               |                 |                 |                 |                 | 0.89%           |                                                    |
| Myomesin-2                                                              | P54296 |                                               |                 |                 |                 |                 | 1.12%           |                                                    |

Supplementary Table 2

|                                                                     |        | Fractional synthesis rate - % new per day (k) |                 |                 |                 |                 |                 | Protein FSR vs<br>Fibrosis Score (r <sup>2</sup> ) |
|---------------------------------------------------------------------|--------|-----------------------------------------------|-----------------|-----------------|-----------------|-----------------|-----------------|----------------------------------------------------|
|                                                                     |        | Subject<br>#003                               | Subject<br>#004 | Subject<br>#005 | Subject<br>#007 | Subject<br>#009 | Subject<br>#011 |                                                    |
| Fibrosis<br>Score                                                   |        | 3                                             | 0               | 2               | 1               | 4               | 0               |                                                    |
| Myosin light chain 1/3, skeletal muscle isoform                     | P05976 |                                               |                 |                 |                 |                 | 0.84%           |                                                    |
| Myosin light chain 3                                                | P08590 |                                               |                 |                 |                 |                 | 0.43%           |                                                    |
| Myosin light chain 6B                                               | P14649 |                                               |                 |                 |                 | 6.71%           | 3.24%           |                                                    |
| Myosin light polypeptide 6                                          | P60660 |                                               | 6.40%           | 6.32%           | 2.41%           | 5.24%           | 6.37%           |                                                    |
| Myosin regulatory light chain 2, skeletal muscle isoform            | Q96A32 |                                               |                 |                 |                 |                 | 1.14%           |                                                    |
| Myosin regulatory light chain 2, ventricular/cardiac muscle isoform | P10916 |                                               |                 |                 |                 |                 | 0.96%           |                                                    |
| Myosin-1                                                            | P12882 |                                               |                 |                 |                 |                 | 1.06%           |                                                    |
| Myosin-10                                                           | P35580 |                                               |                 |                 |                 | 6.05%           |                 |                                                    |
| Myosin-11                                                           | P35749 |                                               |                 |                 |                 | 3.44%           |                 |                                                    |
| Myosin-13                                                           | Q9UKX3 |                                               |                 |                 |                 |                 | 0.70%           |                                                    |
| Myosin-2                                                            | Q9UKX2 |                                               |                 |                 |                 |                 | 1.40%           |                                                    |
| Myosin-6                                                            | P13533 |                                               | -0.95%          |                 | 0.09%           |                 | 1.01%           |                                                    |
| Myosin-7                                                            | P12883 |                                               |                 |                 |                 |                 | 1.11%           |                                                    |
| Myosin-9                                                            | P35579 | ≥6.98%                                        | 7.64%           | 7.83%           | 3.29%           | 5.84%           | 6.57%           |                                                    |
| Myosin-binding protein C, slow-type                                 | Q00872 |                                               |                 |                 |                 |                 | 2.69%           |                                                    |
| Myozenin-1                                                          | Q9NP98 |                                               |                 |                 |                 |                 | 1.59%           |                                                    |
| NAD kinase domain-containing protein 1                              | Q4G0N4 |                                               |                 | 0.44%           |                 |                 |                 |                                                    |
| NAD(P) transhydrogenase, mitochondrial                              | Q13423 |                                               | 1.86%           | 1.97%           |                 |                 |                 |                                                    |
| NADH dehydrogenase [ubiquinone] 1 alpha subcomplex subunit 13       | Q9P0J0 |                                               |                 |                 | 2.48%           |                 |                 |                                                    |
| NADPH--cytochrome P450 reductase                                    | P16435 |                                               | ≥10.47%         |                 |                 |                 |                 |                                                    |
| Neutral alpha-glucosidase AB                                        | Q14697 |                                               |                 | 3.28%           |                 |                 |                 |                                                    |
| Nicotinate phosphoribosyltransferase                                | Q6XQN6 |                                               |                 | 2.94%           |                 |                 |                 |                                                    |
| Nucleophosmin                                                       | P06748 |                                               | 3.09%           | 2.46%           |                 |                 |                 |                                                    |
| Nucleoside diphosphate kinase A                                     | P15531 |                                               | 4.25%           |                 |                 | 6.15%           |                 |                                                    |
| Omega-amidase NIT2                                                  | Q9NQR4 |                                               |                 |                 | 2.29%           |                 |                 |                                                    |
| Ornithine carbamoyltransferase, mitochondrial                       | P00480 |                                               | 3.53%           | 2.40%           | 3.26%           |                 | 3.93%           |                                                    |

**Supplementary Table 2**

|                                                        |        | Fractional synthesis rate - % new per day (k) |                 |                 |                 |                 |                 | Protein FSR vs<br>Fibrosis Score (r <sup>2</sup> ) |
|--------------------------------------------------------|--------|-----------------------------------------------|-----------------|-----------------|-----------------|-----------------|-----------------|----------------------------------------------------|
|                                                        |        | Subject<br>#003                               | Subject<br>#004 | Subject<br>#005 | Subject<br>#007 | Subject<br>#009 | Subject<br>#011 |                                                    |
| Fibrosis<br>Score                                      |        | 3                                             | 0               | 2               | 1               | 4               | 0               |                                                    |
| Peptidyl-prolyl cis-trans isomerase A                  | P62937 |                                               |                 | ≥11.51%         |                 | 9.94%           | 7.84%           |                                                    |
| Peroxiredoxin-1                                        | Q06830 | ≥6.98%                                        | 4.94%           | 3.59%           |                 |                 | 6.64%           |                                                    |
| Peroxiredoxin-2                                        | P32119 | 4.12%                                         | 2.77%           | 2.69%           | 2.02%           |                 | 3.34%           |                                                    |
| Peroxiredoxin-4                                        | Q13162 | ≥6.98%                                        | 6.41%           | 4.53%           | 3.20%           |                 |                 |                                                    |
| Peroxiredoxin-5, mitochondrial                         | P30044 |                                               |                 | 3.19%           |                 |                 |                 |                                                    |
| Peroxiredoxin-6                                        | P30041 | ≥6.98%                                        | 4.47%           | 3.39%           | 2.26%           | 6.42%           | 3.83%           |                                                    |
| Peroxisomal acyl-coenzyme A oxidase 2                  | Q99424 |                                               |                 |                 | 0.41%           |                 |                 |                                                    |
| Peroxisomal bifunctional enzyme                        | Q08426 | ≥6.98%                                        | 5.07%           | 5.67%           | 3.55%           | ≥10.47%         | 6.28%           |                                                    |
| Peroxisomal membrane protein 2                         | Q9NR77 |                                               |                 |                 | ≥4.11%          |                 |                 |                                                    |
| Peroxisomal multifunctional enzyme type 2              | P51659 | ≥6.98%                                        | 5.49%           | 6.04%           | ≥4.11%          |                 | 5.50%           |                                                    |
| Peroxisomal sarcosine oxidase                          | Q9P0Z9 | 3.11%                                         | 3.48%           | 4.44%           | 3.50%           |                 | 4.55%           |                                                    |
| Peroxisomal trans-2-enoyl-CoA reductase                | Q9BY49 |                                               | 2.54%           | 3.47%           |                 |                 |                 |                                                    |
| Phenazine biosynthesis-like domain-containing protein  | P30039 |                                               | 2.17%           | 2.59%           |                 |                 |                 |                                                    |
| Phosphate carrier protein, mitochondrial               | Q00325 | 6.07%                                         | 3.88%           | 3.08%           | 2.38%           | 5.10%           | 3.07%           | 0.47                                               |
| Phosphatidylethanolamine-binding protein 1             | P30086 | ≥6.98%                                        | 4.24%           | 3.60%           | 2.89%           | 8.03%           | 4.33%           |                                                    |
| Phosphoenolpyruvate carboxykinase [GTP], mitochondrial | Q16822 | 5.56%                                         | 3.89%           | 3.46%           | 2.44%           | 6.81%           | 4.07%           | 0.56                                               |
| Phosphoenolpyruvate carboxykinase, cytosolic [GTP]     | P35558 |                                               | 4.60%           | 4.93%           | 3.09%           |                 |                 |                                                    |
| Phosphoglucomutase-1                                   | P36871 | ≥6.98%                                        | 3.56%           | 2.88%           | 2.87%           |                 | 3.79%           |                                                    |
| Phosphoglycerate kinase 1                              | P00558 | ≥6.98%                                        | 3.95%           | 2.28%           | 2.06%           | 4.72%           | 2.45%           |                                                    |
| Phosphoglycerate mutase 1                              | P18669 | ≥6.98%                                        | 4.01%           | 1.93%           | 2.26%           | 5.82%           | 2.38%           |                                                    |
| Polypyrimidine tract-binding protein 1                 | P26599 |                                               | 3.95%           |                 |                 |                 |                 |                                                    |
| Prelamin-A/C                                           | P02545 | 0.17%                                         | 2.09%           | 1.31%           | 1.19%           | 5.03%           | 1.56%           | 0.17                                               |
| Profilin-1                                             | P07737 |                                               | 9.83%           | 8.10%           | 3.84%           | ≥10.47%         | 9.82%           |                                                    |
| Prohibitin                                             | P35232 | ≥6.98%                                        | 3.06%           | 3.64%           | 3.59%           | ≥10.47%         | 4.14%           |                                                    |
| Prohibitin-2                                           | Q99623 | 3.77%                                         | 2.80%           | 2.69%           | 2.27%           | 0.93%           | 3.33%           | 0.21                                               |
| Prolargin                                              | P51888 |                                               |                 |                 |                 | 2.24%           |                 |                                                    |

**Supplementary Table 2**

|                                               |        | Fractional synthesis rate - % new per day (k) |                 |                 |                 |                 |                 | Protein FSR vs<br>Fibrosis Score (r <sup>2</sup> ) |
|-----------------------------------------------|--------|-----------------------------------------------|-----------------|-----------------|-----------------|-----------------|-----------------|----------------------------------------------------|
|                                               |        | Subject<br>#003                               | Subject<br>#004 | Subject<br>#005 | Subject<br>#007 | Subject<br>#009 | Subject<br>#011 |                                                    |
| Fibrosis<br>Score                             |        | 3                                             | 0               | 2               | 1               | 4               | 0               |                                                    |
| Proline dehydrogenase 1, mitochondrial        | O43272 |                                               |                 |                 |                 | 1.09%           |                 |                                                    |
| Prostaglandin reductase 1                     | Q14914 | 5.73%                                         | 3.80%           | 3.11%           | 1.98%           | 7.03%           |                 |                                                    |
| Proteasome activator complex subunit 1        | Q06323 |                                               | 6.21%           |                 |                 |                 |                 |                                                    |
| Proteasome activator complex subunit 2        | Q9UL46 |                                               | 5.60%           | 4.36%           |                 |                 | 5.90%           |                                                    |
| Protein CutA                                  | O60888 |                                               |                 | 0.40%           |                 |                 |                 |                                                    |
| Protein disulfide-isomerase                   | P07237 | ≥6.98%                                        | 5.72%           | 5.25%           | 3.58%           | ≥10.47%         | 6.94%           |                                                    |
| Protein disulfide-isomerase A3                | P30101 |                                               | 5.77%           | 10.50%          | 3.31%           |                 | 7.49%           |                                                    |
| Protein disulfide-isomerase A4                | P13667 |                                               | 6.18%           | 4.47%           |                 |                 | 4.38%           |                                                    |
| Protein disulfide-isomerase A6                | Q15084 | ≥6.98%                                        | 5.00%           | 4.88%           | 2.67%           | ≥10.47%         | 5.97%           |                                                    |
| Protein DJ-1                                  | Q99497 |                                               | 4.29%           | 4.33%           |                 |                 | 3.83%           |                                                    |
| Protein NipSnap homolog 1                     | Q9BPW8 |                                               | 3.09%           | 3.66%           | 3.17%           |                 | 4.72%           |                                                    |
| Protein NYNRIN                                | Q9P2P1 | 5.79%                                         |                 | 2.68%           |                 |                 |                 |                                                    |
| Protein-glutamine gamma-glutamyltransferase 2 | P21980 | ≥6.98%                                        | 6.00%           | 4.16%           | 3.89%           | 7.26%           | 5.49%           |                                                    |
| Pterin-4-alpha-carbinolamine dehydratase      | P61457 |                                               |                 | 3.37%           |                 |                 |                 |                                                    |
| Putative beta-actin-like protein 3            | Q9BYX7 | 4.39%                                         | 2.66%           | 2.61%           | 1.67%           | 2.74%           | 1.59%           | 0.35                                               |
| Putative inactive carboxylesterase 4          | Q9UKY3 | ≥6.98%                                        | 5.21%           | 4.89%           | 3.65%           | ≥10.47%         | 5.59%           |                                                    |
| Pyruvate carboxylase, mitochondrial           | P11498 | 5.56%                                         | 3.41%           | 3.31%           | 2.32%           |                 | 3.08%           |                                                    |
| Pyruvate kinase isozymes R/L                  | P30613 |                                               | 5.03%           | 4.67%           |                 |                 | 5.30%           |                                                    |
| Quinone oxidoreductase                        | Q08257 |                                               | 3.56%           | 4.16%           |                 |                 | 4.65%           |                                                    |
| Rab GDP dissociation inhibitor alpha          | P31150 | ≥6.98%                                        |                 | 4.28%           |                 |                 | 5.14%           |                                                    |
| Rab GDP dissociation inhibitor beta           | P50395 |                                               | 6.27%           | 5.35%           |                 |                 | 6.87%           |                                                    |
| Ras GTPase-activating-like protein IQGAP2     | Q13576 |                                               |                 | 4.52%           |                 |                 |                 |                                                    |
| Receptor expression-enhancing protein 6       | Q96HR9 |                                               | 7.45%           | 4.57%           | 3.45%           |                 |                 |                                                    |
| Retinal dehydrogenase 1                       | P00352 | ≥6.98%                                        | 4.14%           | 4.00%           | 3.28%           | 8.40%           | 4.51%           |                                                    |
| Retinol dehydrogenase 16                      | O75452 |                                               | 4.54%           | 3.18%           |                 |                 |                 |                                                    |
| Ribonuclease UK114                            | P52758 | ≥6.98%                                        | 3.89%           | 3.19%           | 2.63%           | 5.88%           | 4.14%           |                                                    |
| Ribose-5-phosphate isomerase                  | P49247 |                                               |                 | 0.44%           |                 |                 |                 |                                                    |

**Supplementary Table 2**

|                                                                          |        | Fractional synthesis rate - % new per day (k) |                 |                 |                 |                 |                 | Protein FSR vs<br>Fibrosis Score (r <sup>2</sup> ) |
|--------------------------------------------------------------------------|--------|-----------------------------------------------|-----------------|-----------------|-----------------|-----------------|-----------------|----------------------------------------------------|
|                                                                          |        | Subject<br>#003                               | Subject<br>#004 | Subject<br>#005 | Subject<br>#007 | Subject<br>#009 | Subject<br>#011 |                                                    |
| Fibrosis<br>Score                                                        |        | 3                                             | 0               | 2               | 1               | 4               | 0               |                                                    |
| Sarcoplasmic/endoplasmic reticulum calcium ATPase 1                      | O14983 |                                               |                 |                 |                 |                 | 1.89%           |                                                    |
| Sarcoplasmic/endoplasmic reticulum calcium ATPase 2                      | P16615 |                                               |                 |                 |                 |                 | 2.78%           |                                                    |
| Sarcosine dehydrogenase, mitochondrial                                   | Q9UL12 |                                               |                 | 3.45%           |                 | 3.63%           |                 |                                                    |
| Selenium-binding protein 1                                               | Q13228 | ≥6.98%                                        | 4.34%           | 3.40%           | 2.24%           | 5.22%           | 4.11%           |                                                    |
| Serine hydroxymethyltransferase, cytosolic                               | P34896 |                                               | 4.80%           | 3.94%           |                 |                 | 5.18%           |                                                    |
| Serine--pyruvate aminotransferase                                        | P21549 | ≥6.98%                                        | 5.56%           | 5.11%           | 3.03%           | 9.82%           | 5.73%           |                                                    |
| Serum albumin                                                            | P02768 | 4.16%                                         | 2.50%           | 2.62%           | 1.86%           | 1.94%           | 2.73%           | 0.02                                               |
| Short/branched chain specific acyl-CoA dehydrogenase, mitochondrial      | P45954 |                                               | 4.83%           | 5.51%           | 3.68%           |                 | 6.13%           |                                                    |
| Short-chain specific acyl-CoA dehydrogenase, mitochondrial               | P16219 |                                               | 3.20%           | 2.56%           | 2.22%           |                 | 2.99%           |                                                    |
| Sideroflexin-1                                                           | Q9H9B4 |                                               | 2.82%           | 2.46%           |                 |                 |                 |                                                    |
| Sorbitol dehydrogenase                                                   | Q00796 |                                               | 4.17%           | 2.99%           | 2.97%           | 9.30%           | 4.82%           |                                                    |
| Spectrin alpha chain, brain                                              | Q13813 |                                               | 5.51%           | 5.25%           | ≥4.11%          |                 | 4.93%           |                                                    |
| Stress-70 protein, mitochondrial                                         | P38646 | ≥6.98%                                        | 7.71%           | 8.24%           | 3.08%           |                 | 9.97%           |                                                    |
| Succinate dehydrogenase [ubiquinone] flavoprotein subunit, mitochondrial | P31040 | 4.29%                                         | 3.25%           | 3.76%           | 2.97%           | 8.99%           | 4.24%           | 0.55                                               |
| Succinate-semialdehyde dehydrogenase, mitochondrial                      | P51649 |                                               | 2.22%           | 2.62%           |                 |                 | 2.32%           |                                                    |
| Sulfotransferase 1A1                                                     | P50225 |                                               |                 | 3.51%           | 2.65%           | 5.41%           | 4.62%           |                                                    |
| Superoxide dismutase [Cu-Zn]                                             | P00441 |                                               |                 | 7.36%           |                 |                 |                 |                                                    |
| Superoxide dismutase [Mn], mitochondrial                                 | P04179 | ≥6.98%                                        | 3.04%           | 3.49%           | 2.59%           | 8.61%           | 4.59%           |                                                    |
| Talin-1                                                                  | Q9Y490 |                                               |                 | 0.32%           |                 |                 |                 |                                                    |
| Thioredoxin-dependent peroxide reductase, mitochondrial                  | P30048 | ≥6.98%                                        | 4.07%           | 5.03%           | ≥4.11%          | 6.07%           | 4.38%           |                                                    |
| Thiosulfate sulfurtransferase                                            | Q16762 | ≥6.98%                                        | 4.33%           | 3.03%           | 3.24%           |                 | 5.12%           |                                                    |
| Thymidine phosphorylase                                                  | P19971 | ≥6.98%                                        | 4.67%           |                 | 2.97%           | 5.01%           | 5.26%           |                                                    |

**Supplementary Table 2**

|                                                           |                   | Fractional synthesis rate - % new per day (k) |                 |                 |                 |                 |                 | Protein FSR vs<br>Fibrosis Score (r <sup>2</sup> ) |
|-----------------------------------------------------------|-------------------|-----------------------------------------------|-----------------|-----------------|-----------------|-----------------|-----------------|----------------------------------------------------|
|                                                           |                   | Subject<br>#003                               | Subject<br>#004 | Subject<br>#005 | Subject<br>#007 | Subject<br>#009 | Subject<br>#011 |                                                    |
|                                                           | Fibrosis<br>Score | 3                                             | 0               | 2               | 1               | 4               | 0               |                                                    |
| Titin                                                     | Q8WZ42            |                                               |                 |                 |                 |                 | 1.57%           |                                                    |
| Transforming growth factor-beta-induced protein ig-<br>h3 | Q15582            |                                               |                 |                 |                 | ≥10.47%         |                 |                                                    |
| Transgelin                                                | Q01995            |                                               |                 |                 |                 | 4.51%           |                 |                                                    |
| Transgelin-2                                              | P37802            |                                               |                 |                 |                 | 5.63%           |                 |                                                    |
| Transketolase                                             | P29401            |                                               | 3.05%           |                 |                 | 2.92%           | 2.39%           |                                                    |
| Tricarboxylate transport protein, mitochondrial           | P53007            |                                               |                 |                 |                 |                 | 3.83%           |                                                    |
| Trifunctional enzyme subunit alpha, mitochondrial         | P40939            | 5.68%                                         | 2.71%           | 2.33%           | 2.42%           | 4.92%           | 3.02%           | 0.56                                               |
| Trifunctional enzyme subunit beta, mitochondrial          | P55084            |                                               | 2.95%           | 2.80%           | 2.73%           |                 | 3.42%           |                                                    |
| Triosephosphate isomerase                                 | P60174            | 6.02%                                         | 3.22%           | 2.65%           | 2.20%           | 4.00%           | 2.92%           | 0.34                                               |
| Tripeptidyl-peptidase 1                                   | O14773            |                                               | 3.53%           | 1.84%           | 2.11%           | 5.79%           |                 |                                                    |
| Tropomyosin alpha-1 chain                                 | P09493            |                                               |                 |                 | 2.48%           | 3.19%           | 1.25%           |                                                    |
| Tropomyosin alpha-3 chain                                 | P06753            |                                               |                 |                 |                 |                 | 1.68%           |                                                    |
| Tropomyosin alpha-4 chain                                 | P67936            |                                               |                 |                 |                 | 3.54%           |                 |                                                    |
| Tropomyosin beta chain                                    | P07951            |                                               |                 |                 |                 |                 | 1.11%           |                                                    |
| Troponin C, slow skeletal and cardiac muscles             | P63316            |                                               |                 |                 |                 |                 | 1.57%           |                                                    |
| Tubulin alpha-1A chain                                    | Q71U36            | 6.60%                                         | 3.83%           | 2.89%           | 2.49%           | 4.92%           | 4.20%           | 0.26                                               |
| Tubulin alpha-1B chain                                    | P68363            | 4.29%                                         | 2.88%           | 2.61%           | 2.28%           | 4.01%           | 2.29%           | 0.66                                               |
| Tubulin alpha-4A chain                                    | P68366            | ≥6.98%                                        | 4.00%           |                 | ≥4.11%          |                 | 4.27%           |                                                    |
| Tubulin beta chain                                        | P07437            |                                               | 4.91%           | 5.73%           |                 |                 |                 |                                                    |
| Tubulin beta-2A chain                                     | Q13885            | ≥6.98%                                        | 6.07%           | 2.31%           | 1.85%           | 3.19%           | 3.01%           |                                                    |
| Tubulin beta-3 chain                                      | Q13509            |                                               |                 |                 |                 |                 | 3.44%           |                                                    |
| Tubulin beta-4A chain                                     | P04350            |                                               | 4.84%           |                 |                 |                 |                 |                                                    |
| Ubiquitin-60S ribosomal protein L40                       | P62987            | ≥6.98%                                        | ≥10.47%         | ≥11.51%         | ≥4.11%          | ≥10.47%         | ≥10.96%         |                                                    |
| UDP-glucose 6-dehydrogenase                               | O60701            |                                               | 5.13%           | 3.93%           |                 |                 |                 |                                                    |
| UDP-glucuronosyltransferase 1-1                           | P22309            |                                               | 4.74%           |                 |                 |                 |                 |                                                    |
| UDP-glucuronosyltransferase 1-10                          | Q9HAW8            |                                               | 3.39%           |                 |                 |                 | 2.46%           |                                                    |

**Supplementary Table 2**

**Fractional synthesis rate - % new per day (k)**

|                                                                   |                           | <b>Subject<br/>#003</b> | <b>Subject<br/>#004</b> | <b>Subject<br/>#005</b> | <b>Subject<br/>#007</b> | <b>Subject<br/>#009</b> | <b>Subject<br/>#011</b> | <b>Protein FSR vs<br/>Fibrosis Score (r<sup>2</sup>)</b> |
|-------------------------------------------------------------------|---------------------------|-------------------------|-------------------------|-------------------------|-------------------------|-------------------------|-------------------------|----------------------------------------------------------|
|                                                                   | <b>Fibrosis<br/>Score</b> | <b>3</b>                | <b>0</b>                | <b>2</b>                | <b>1</b>                | <b>4</b>                | <b>0</b>                |                                                          |
| UDP-glucuronosyltransferase 1-4                                   | P22310                    |                         | 7.10%                   |                         |                         |                         |                         |                                                          |
| UDP-glucuronosyltransferase 2A1                                   | Q9Y4X1                    |                         |                         | 4.67%                   | 2.37%                   |                         | 3.92%                   |                                                          |
| UDP-glucuronosyltransferase 2B15                                  | P54855                    |                         |                         | 11.42%                  |                         |                         |                         |                                                          |
| UDP-glucuronosyltransferase 2B4                                   | P06133                    |                         |                         | 2.96%                   |                         |                         |                         |                                                          |
| UDP-glucuronosyltransferase 2B7                                   | P16662                    | ≥6.98%                  | 5.32%                   | 5.51%                   |                         |                         | ≥10.96%                 |                                                          |
| Urocanate hydratase                                               | Q96N76                    |                         |                         | 3.82%                   |                         |                         |                         |                                                          |
| UTP--glucose-1-phosphate uridylyltransferase                      | Q16851                    | ≥6.98%                  | 4.30%                   | 4.47%                   | 3.56%                   | ≥10.47%                 | 5.22%                   |                                                          |
| Very long-chain acyl-CoA synthetase                               | O14975                    | ≥6.98%                  | 6.18%                   | 5.76%                   | 4.10%                   |                         | 7.06%                   |                                                          |
| Very long-chain specific acyl-CoA dehydrogenase,<br>mitochondrial | P49748                    |                         |                         | 6.47%                   |                         |                         | 5.33%                   |                                                          |
| Vimentin                                                          | P08670                    | ≥6.98%                  | 4.62%                   | 3.70%                   | ≥4.11%                  | 3.75%                   | 4.08%                   |                                                          |
| Vinculin                                                          | P18206                    |                         | 1.97%                   |                         |                         | 2.02%                   | 1.95%                   |                                                          |
| Voltage-dependent anion-selective channel protein 1               | P21796                    |                         | 3.08%                   |                         |                         |                         |                         |                                                          |
