# Supplementary material for: Turnover Rates of Hepatic Collagen and Circulating Collagen-Associated Proteins in Humans with Chronic Liver Disease
Source: PubMed Central journal article supplement (PMC4409311; doi:10.1371/journal.pone.0123311), 2015-04-24
Supplement: pone.0123311.s004.pdf [file pone.0123311.s004.pdf]

Supplementary Table 3

Total fraction new at end of labeling period - % new (F)

| Plasma Proteins                       | Uniprot<br>Accession | Subject<br>#003 | Subject<br>#004 | Subject<br>#005 | Subject<br>#007 | Subject<br>#008 | Subject<br>#009 | Subject<br>#010 | Subject<br>#011 |
|---------------------------------------|----------------------|-----------------|-----------------|-----------------|-----------------|-----------------|-----------------|-----------------|-----------------|
| Actin, aortic smooth muscle           | P62736               |                 |                 |                 |                 |                 |                 | 91.02%          |                 |
| Afamin                                | P43652               | 102.66%         | 75.37%          | 71.85%          | 87.82%          | 100.64%         | 79.62%          | 90.51%          | 72.39%          |
| Alpha-1-antichymotrypsin              | P01011               | 107.96%         | 80.75%          | 77.32%          | 92.35%          | 102.84%         | 80.31%          | 94.27%          | 76.24%          |
| Alpha-1B-glycoprotein                 | P04217               | 99.86%          | 80.83%          | 77.31%          | 88.39%          | 96.55%          | 80.66%          | 91.59%          | 77.76%          |
| Alpha-2-antiplasmin                   | P08697               | 107.22%         | 87.68%          | 90.33%          | 93.52%          | 100.12%         | 86.59%          | 95.97%          | 85.21%          |
| Alpha-2-HS-glycoprotein               | P02765               | 104.24%         | 74.60%          | 75.08%          | 87.44%          | 103.38%         | 79.05%          | 90.05%          | 87.29%          |
| Alpha-2-macroglobulin                 | P01023               | 91.26%          | 46.79%          | 45.45%          | 80.47%          | 90.72%          | 65.99%          | 61.44%          | 41.06%          |
| Angiotensinogen                       | P01019               | 115.19%         | 92.78%          | 95.51%          | 100.91%         | 108.68%         | 85.99%          | 103.38%         | 97.05%          |
| Antithrombin-III                      | P01008               | 103.57%         | 83.97%          | 84.96%          | 92.26%          | 100.47%         | 86.51%          | 95.83%          | 87.67%          |
| Apolipoprotein A-II                   | P02652               | 114.48%         | 78.72%          | 85.94%          |                 | 102.82%         |                 | 97.03%          | 80.62%          |
| Apolipoprotein A-IV                   | P06727               | 84.09%          | 79.08%          | 71.64%          | 69.36%          | 80.02%          | 85.90%          | 76.51%          | 80.14%          |
| Apolipoprotein B-100                  | P04114               | 104.04%         | 86.13%          | 85.66%          | 91.09%          | 100.43%         | 85.49%          | 95.46%          | 87.63%          |
| Apolipoprotein E                      | P02649               | 94.66%          | 93.38%          | 90.06%          | 49.88%          | 99.08%          | 94.20%          | 94.96%          | 91.51%          |
| Apolipoprotein(a)                     | P08519               |                 | 68.42%          |                 |                 |                 |                 | 80.21%          |                 |
| Beta-2-glycoprotein 1                 | P02749               | 96.32%          | 80.17%          | 84.18%          | 85.11%          | 98.22%          | 74.03%          | 87.00%          | 84.38%          |
| Beta-2-microglobulin                  | P61769               |                 |                 |                 |                 |                 | 72.17%          |                 |                 |
| Biotinidase                           | P43251               |                 |                 | 73.91%          |                 | 99.98%          | 80.31%          | 78.93%          | 73.18%          |
| Carbonic anhydrase 1                  | P00915               |                 |                 |                 |                 |                 |                 |                 | 12.13%          |
| Carboxypeptidase B2                   | Q96IY4               |                 | 72.38%          |                 |                 | 88.93%          |                 |                 |                 |
| Carboxypeptidase N catalytic chain    | P15169               |                 | 84.67%          | 82.20%          |                 | 111.55%         |                 | 92.37%          | 72.93%          |
| Carboxypeptidase N subunit 2          | P22792               |                 | 92.99%          |                 |                 |                 |                 | 101.20%         | 91.67%          |
| Ceruloplasmin                         | P00450               | 102.34%         | 66.21%          | 62.85%          | 85.28%          | 96.93%          | 68.49%          | 82.24%          | 62.06%          |
| Cholinesterase                        | P06276               |                 |                 |                 |                 | 92.43%          |                 |                 | 49.46%          |
| Clusterin                             | P10909               | 105.31%         | 94.90%          | 91.64%          | 96.04%          | 104.94%         | 95.31%          | 104.31%         | 99.68%          |
| Coagulation factor X                  | P00742               |                 | 91.77%          | 81.33%          |                 | 101.94%         |                 | 100.57%         | 89.17%          |
| Coagulation factor XII                | P00748               | 106.45%         | 76.07%          | 78.02%          | 88.29%          | 95.88%          | 78.60%          | 90.71%          | 72.33%          |
| Complement C1q subcomponent subunit A | P02745               | 92.76%          | 69.27%          | 70.21%          |                 | 90.62%          | 81.71%          |                 |                 |
| Complement C1q subcomponent subunit B | P02746               |                 |                 |                 | 72.76%          | 87.42%          | 82.14%          |                 |                 |
| Complement C1q subcomponent subunit C | P02747               | 93.91%          | 67.65%          | 62.73%          | 74.43%          | 82.17%          | 83.37%          | 79.52%          | 59.54%          |

Supplementary Table 3

Total fraction new at end of labeling period - % new (F)

| Plasma Proteins                          | Uniprot<br>Accession | Subject<br>#003 | Subject<br>#004 | Subject<br>#005 | Subject<br>#007 | Subject<br>#008 | Subject<br>#009 | Subject<br>#010 | Subject<br>#011 |
|------------------------------------------|----------------------|-----------------|-----------------|-----------------|-----------------|-----------------|-----------------|-----------------|-----------------|
| Complement C1r subcomponent              | P00736               | 96.64%          | 84.38%          | 88.82%          | 86.00%          | 94.20%          | 90.72%          | 86.04%          | 90.98%          |
| Complement C1r subcomponent-like protein | Q9NZP8               | 87.89%          | 74.07%          | 74.11%          | 79.46%          | 85.66%          | 77.34%          | 80.81%          | 76.04%          |
| Complement C1s subcomponent              | P09871               | 96.90%          | 85.28%          | 92.71%          | 90.28%          | 95.24%          | 93.76%          | 88.14%          | 93.26%          |
| Complement C2                            | P06681               | 109.74%         | 88.00%          | 89.18%          | 92.48%          | 100.98%         | 97.09%          | 96.77%          | 88.85%          |
| Complement C3                            | P01024               | 106.01%         | 86.32%          |                 |                 |                 | 84.33%          | 93.05%          |                 |
| Complement C4-A                          | POC0L4               | 104.53%         | 87.71%          | 87.39%          | 92.30%          | 100.24%         | 85.19%          | 96.84%          | 85.44%          |
| Complement C4-B                          | POC0L5               | 108.88%         | 86.90%          | 92.72%          |                 | 104.58%         | 71.52%          |                 |                 |
| Complement C5                            | P01031               | 100.81%         | 81.46%          | 78.18%          | 88.73%          | 101.19%         | 80.16%          | 92.94%          | 80.90%          |
| Complement component C6                  | P13671               | 115.37%         | 91.73%          | 36.13%          | 84.43%          | 105.90%         | 89.04%          | 98.33%          | 74.40%          |
| Complement component C7                  | P10643               | 94.35%          | 74.23%          | 68.12%          | 83.34%          | 97.06%          | 87.18%          | 83.36%          | 67.38%          |
| Complement component C8 alpha chain      | P07357               | 109.28%         | 82.98%          | 83.06%          | 93.93%          | 101.37%         | 84.60%          | 99.73%          | 79.35%          |
| Complement component C8 beta chain       | P07358               | 96.66%          | 75.09%          | 83.43%          | 79.45%          | 91.96%          | 71.80%          | 89.54%          | 80.08%          |
| Complement component C8 gamma chain      | P07360               | 105.66%         | 79.08%          | 78.23%          | 89.75%          | 100.38%         | 83.65%          | 88.68%          | 80.64%          |
| Complement component C9                  | P02748               | 111.25%         | 84.14%          | 88.01%          | 89.81%          | 102.75%         | 87.07%          | 93.26%          | 83.24%          |
| Complement factor B                      | P00751               | 107.47%         | 83.66%          | 90.87%          | 92.00%          | 104.43%         | 90.69%          | 95.87%          | 84.65%          |
| Complement factor H                      | P08603               | 103.72%         | 73.17%          | 71.04%          | 87.43%          | 102.10%         | 76.49%          | 87.38%          | 70.74%          |
| Complement factor I                      | P05156               | 112.87%         | 92.69%          | 92.74%          | 99.98%          | 108.84%         | 95.75%          | 106.20%         | 91.77%          |
| Corticosteroid-binding globulin          | P08185               | 104.29%         | 72.67%          |                 |                 | 99.83%          | 75.61%          | 87.59%          | 70.13%          |
| Extracellular matrix protein 1           | Q16610               |                 |                 |                 | 79.77%          | 87.13%          | 91.23%          | 95.35%          |                 |
| Fibrinogen alpha chain                   | P02671               | 100.43%         | 65.27%          | 75.72%          | 89.71%          | 103.11%         | 74.66%          | 88.73%          | 72.32%          |
| Fibrinogen beta chain                    | P02675               | 88.95%          |                 | 64.53%          | 86.93%          | 99.22%          | 66.09%          | 78.99%          | 62.43%          |
| Fibrinogen gamma chain                   | P02679               |                 |                 | 67.64%          | 88.61%          | 101.21%         | 73.79%          | 80.61%          | 63.63%          |
| Fibronectin                              | P02751               | 97.76%          | 84.82%          | 79.59%          | 87.95%          | 96.94%          | 79.11%          | 89.97%          | 83.65%          |
| Ficolin-3                                | O75636               | 99.53%          | 72.57%          | 89.48%          |                 | 97.06%          | 68.65%          | 79.95%          | 70.06%          |
| Gelsolin                                 | P06396               | 98.52%          | 79.71%          | 79.20%          | 84.57%          | 100.18%         | 90.00%          | 92.19%          | 80.52%          |
| Glutathione peroxidase 3                 | P22352               |                 |                 | 52.92%          |                 |                 | 69.13%          |                 |                 |
| Haptoglobin                              | P00738               |                 |                 | 82.09%          |                 |                 |                 |                 |                 |
| Haptoglobin-related protein              | P00739               |                 | 91.03%          | 83.29%          |                 |                 |                 |                 |                 |
| Hemoglobin subunit alpha                 | P69905               | 35.62%          |                 |                 |                 |                 | 39.18%          |                 | 7.85%           |

**Supplementary Table 3**

**Total fraction new at end of labeling period - % new (F)**

| <b>Plasma Proteins</b>                                                 | <b>Uniprot<br/>Accession</b> | <b>Subject<br/>#003</b> | <b>Subject<br/>#004</b> | <b>Subject<br/>#005</b> | <b>Subject<br/>#007</b> | <b>Subject<br/>#008</b> | <b>Subject<br/>#009</b> | <b>Subject<br/>#010</b> | <b>Subject<br/>#011</b> |
|------------------------------------------------------------------------|------------------------------|-------------------------|-------------------------|-------------------------|-------------------------|-------------------------|-------------------------|-------------------------|-------------------------|
| Hemoglobin subunit beta                                                | P68871                       | 32.43%                  | 6.96%                   | 12.26%                  |                         |                         | 34.57%                  |                         | 7.57%                   |
| Hemoglobin subunit delta                                               | P02042                       |                         |                         |                         |                         |                         | 23.36%                  |                         |                         |
| Hemoglobin subunit gamma-1                                             | P69891                       |                         |                         |                         |                         |                         |                         |                         | 15.80%                  |
| Hemopexin                                                              | P02790                       | 91.29%                  | 61.51%                  | 49.69%                  | 80.18%                  | 92.98%                  | 39.45%                  | 70.05%                  | 56.93%                  |
| Heparin cofactor 2                                                     | P05546                       |                         | 69.70%                  |                         |                         | 70.65%                  |                         | 76.17%                  | 55.27%                  |
| Histidine-rich glycoprotein                                            | P04196                       | 115.80%                 | 93.59%                  | 87.13%                  | 95.66%                  | 110.78%                 | 95.18%                  | 106.10%                 | 79.05%                  |
| Ig gamma-3 chain C region                                              | P01860                       |                         |                         |                         |                         |                         | 55.98%                  |                         |                         |
| Ig kappa chain C region                                                | P01834                       | 45.46%                  |                         |                         |                         |                         | 64.64%                  |                         |                         |
| Ig mu chain C region                                                   | P01871                       |                         |                         |                         |                         |                         | 52.60%                  |                         |                         |
| Immunoglobulin lambda-like polypeptide 5                               | B9A064                       |                         |                         |                         |                         |                         | 55.33%                  |                         |                         |
| Insulin-like growth factor-binding protein complex acid labile subunit | P35858                       | 89.92%                  | 74.89%                  | 80.70%                  | 89.78%                  |                         | 72.58%                  | 84.88%                  |                         |
| Inter-alpha-trypsin inhibitor heavy chain H1                           | P19827                       | 106.37%                 | 83.79%                  | 83.60%                  | 89.05%                  | 100.82%                 | 72.24%                  | 95.93%                  | 81.25%                  |
| Inter-alpha-trypsin inhibitor heavy chain H2                           | P19823                       | 101.97%                 | 82.22%                  | 84.66%                  | 86.38%                  | 102.36%                 | 76.62%                  | 91.77%                  | 83.21%                  |
| Inter-alpha-trypsin inhibitor heavy chain H3                           | Q06033                       | 104.84%                 | 90.66%                  | 90.46%                  | 91.44%                  | 97.76%                  | 87.76%                  | 100.97%                 | 88.31%                  |
| Inter-alpha-trypsin inhibitor heavy chain H4                           | Q14624                       | 101.81%                 | 82.31%                  | 83.64%                  | 86.66%                  | 96.66%                  | 81.14%                  | 90.28%                  | 79.84%                  |
| Kallistatin                                                            | P29622                       | 94.22%                  | 81.85%                  | 78.50%                  | 83.23%                  | 89.35%                  | 80.27%                  | 66.39%                  | 80.04%                  |
| Kininogen-1                                                            | P01042                       | 107.19%                 | 83.50%                  | 77.84%                  | 91.31%                  | 102.50%                 | 85.88%                  | 93.86%                  | 78.15%                  |
| Leucine-rich alpha-2-glycoprotein                                      | P02750                       | 107.22%                 | 80.63%                  | 79.80%                  | 92.24%                  | 101.62%                 | 82.25%                  | 94.50%                  | 81.56%                  |
| Low affinity immunoglobulin gamma Fc region receptor III-A             | P08637                       |                         |                         |                         |                         |                         | 67.90%                  |                         |                         |
| Lumican                                                                | P51884                       | 57.56%                  | 28.45%                  | 29.49%                  | 49.46%                  | 49.16%                  | 47.95%                  | 40.90%                  | 20.04%                  |
| N-acetylmuramoyl-L-alanine amidase                                     | Q96PD5                       | 104.68%                 | 77.93%                  | 82.17%                  | 83.98%                  | 97.11%                  | 76.64%                  | 88.41%                  | 84.62%                  |
| Peptidase inhibitor 16                                                 | Q6UXB8                       |                         |                         | 91.72%                  | 80.48%                  |                         |                         |                         |                         |

Supplementary Table 3

Total fraction new at end of labeling period - % new (F)

| Plasma Proteins                                      | Uniprot<br>Accession | Subject<br>#003 | Subject<br>#004 | Subject<br>#005 | Subject<br>#007 | Subject<br>#008 | Subject<br>#009 | Subject<br>#010 | Subject<br>#011 |
|------------------------------------------------------|----------------------|-----------------|-----------------|-----------------|-----------------|-----------------|-----------------|-----------------|-----------------|
| Phosphatidylinositol-glycan-specific phospholipase D | P80108               |                 |                 |                 |                 |                 |                 |                 | 95.87%          |
| Pigment epithelium-derived factor                    | P36955               | 107.15%         | 88.45%          | 92.40%          | 93.32%          | 103.10%         | 101.11%         | 100.25%         | 91.71%          |
| Plasma kallikrein                                    | P03952               | 110.88%         | 70.22%          | 74.98%          | 97.04%          | 101.99%         | 72.29%          | 88.05%          | 69.30%          |
| Plasma protease C1 inhibitor                         | P05155               | 102.86%         | 82.25%          | 85.93%          | 85.87%          | 108.62%         | 90.26%          | 98.21%          | 92.39%          |
| Plasminogen                                          | P00747               | 94.49%          | 80.28%          | 79.34%          | 83.89%          | 92.68%          | 78.50%          | 86.08%          | 78.91%          |
| Plasminogen-related protein B                        | Q02325               |                 |                 |                 |                 |                 |                 |                 | 55.41%          |
| Platelet basic protein                               | P02775               | 108.55%         | 77.58%          |                 | 90.12%          | 91.26%          | 85.59%          | 91.89%          | 75.30%          |
| Platelet factor 4                                    | P02776               |                 | 72.27%          |                 |                 |                 |                 |                 | 73.18%          |
| Platelet factor 4 variant                            | P10720               | 90.68%          |                 |                 |                 |                 |                 |                 |                 |
| Properdin                                            | P27918               |                 |                 |                 |                 | 88.02%          | 88.33%          |                 | 57.74%          |
| Protein AMBP                                         | P02760               | 98.55%          | 93.71%          | 87.77%          | 100.59%         | 98.01%          | 83.70%          | 96.02%          | 89.74%          |
| Protein Z-dependent protease inhibitor               | Q9UK55               | 105.10%         |                 |                 |                 | 98.93%          |                 | 96.32%          | 92.81%          |
| Prothrombin                                          | P00734               | 104.78%         | 82.85%          | 81.55%          | 91.11%          | 101.19%         | 79.94%          | 95.28%          | 79.73%          |
| Retinol-binding protein 4                            | P02753               | 102.37%         | 92.39%          | 95.22%          | 99.97%          | 104.29%         | 97.26%          | 99.82%          | 99.88%          |
| Selenoprotein P                                      | P49908               |                 | 97.61%          | 93.89%          |                 | 102.90%         |                 | 102.70%         | 93.87%          |
| Serotransferrin                                      | P02787               | 100.55%         | 62.12%          | 57.53%          | 85.15%          | 96.95%          | 68.44%          | 82.47%          | 61.04%          |
| Serum amyloid P-component                            | P02743               | 106.43%         | 86.24%          | 88.63%          | 96.51%          | 99.00%          | 80.44%          | 93.45%          | 73.53%          |
| Serum paraoxonase/arylesterase 1                     | P27169               |                 |                 | 71.65%          |                 | 103.39%         | 70.00%          | 89.06%          | 72.02%          |
| Sex hormone-binding globulin                         | P04278               | 102.05%         | 69.46%          | 71.40%          | 85.71%          | 96.81%          | 85.93%          | 84.83%          | 68.97%          |
| Tetranectin                                          | P05452               | 86.23%          | 73.44%          | 67.78%          | 88.69%          | 101.55%         | 89.05%          | 87.95%          | 67.41%          |
| Thrombospondin-1                                     | P07996               | 108.67%         | 75.47%          |                 |                 |                 |                 |                 | 70.49%          |
| Thyroxine-binding globulin                           | P05543               | 100.65%         | 68.63%          |                 | 40.67%          | 104.01%         | 77.23%          | 90.71%          | 71.02%          |
| Vitamin D-binding protein                            | P02774               | 110.36%         | 86.51%          | 91.67%          | 90.30%          | 104.14%         | 85.63%          | 96.19%          | 87.00%          |
| Vitronectin                                          | P04004               | 100.32%         | 80.93%          | 79.08%          | 84.68%          | 86.22%          | 84.04%          | 74.80%          | 75.04%          |
| von Willebrand factor                                | P04275               | 97.43%          | 74.88%          |                 | 82.33%          | 92.34%          | 83.70%          |                 | 69.80%          |
| Zinc-alpha-2-glycoprotein                            | P25311               | 106.78%         |                 | 91.76%          | 88.43%          |                 | 97.01%          |                 |                 |

Supplementary Table 3

Fractional synthesis rate - % new per day (k)

| Plasma Proteins                       | Uniprot<br>Accession | Subject<br>#003 | Subject<br>#004 | Subject<br>#005 | Subject<br>#007 | Subject<br>#008 | Subject<br>#009 | Subject<br>#010 | Subject<br>#011 |
|---------------------------------------|----------------------|-----------------|-----------------|-----------------|-----------------|-----------------|-----------------|-----------------|-----------------|
| Actin, aortic smooth muscle           | P62736               |                 |                 |                 |                 |                 |                 | ≥7.94%          |                 |
| Afamin                                | P43652               | ≥6.98%          | 6.37%           | 6.34%           | 3.76%           | ≥4.9%           | 7.23%           | ≥7.94%          | 6.13%           |
| Alpha-1-antichymotrypsin              | P01011               | ≥6.98%          | 7.49%           | 7.42%           | ≥4.11%          | ≥4.9%           | 7.39%           | ≥7.94%          | 6.84%           |
| Alpha-1B-glycoprotein                 | P04217               | ≥6.98%          | 7.51%           | 7.42%           | 3.85%           | ≥4.9%           | 7.47%           | ≥7.94%          | 7.16%           |
| Alpha-2-antiplasmin                   | P08697               | ≥6.98%          | 9.52%           | ≥11.51%         | ≥4.11%          | ≥4.9%           | 9.13%           | ≥7.94%          | 9.10%           |
| Alpha-2-HS-glycoprotein               | P02765               | ≥6.98%          | 6.23%           | 6.95%           | 3.70%           | ≥4.9%           | 7.11%           | ≥7.94%          | 9.82%           |
| Alpha-2-macroglobulin                 | P01023               | ≥6.98%          | 2.87%           | 3.03%           | 2.92%           | ≥4.9%           | 4.90%           | 3.29%           | 2.52%           |
| Angiotensinogen                       | P01019               | ≥6.98%          | ≥10.47%         | ≥11.51%         | ≥4.11%          | ≥4.9%           | 8.93%           | ≥7.94%          | ≥10.96%         |
| Antithrombin-III                      | P01008               | ≥6.98%          | 8.32%           | 9.47%           | ≥4.11%          | ≥4.9%           | 9.10%           | ≥7.94%          | 9.97%           |
| Apolipoprotein A-II                   | P02652               | ≥6.98%          | 7.03%           | 9.81%           |                 | ≥4.9%           |                 | ≥7.94%          | 7.81%           |
| Apolipoprotein A-IV                   | P06727               | 5.57%           | 7.11%           | 6.30%           | 2.11%           | 3.43%           | 8.90%           | 5.00%           | 7.70%           |
| Apolipoprotein B-100                  | P04114               | ≥6.98%          | 8.98%           | 9.71%           | ≥4.11%          | ≥4.9%           | 8.77%           | ≥7.94%          | 9.95%           |
| Apolipoprotein E                      | P02649               | ≥6.98%          | ≥10.47%         | ≥11.51%         | 1.23%           | ≥4.9%           | ≥10.47%         | ≥7.94%          | ≥10.96%         |
| Apolipoprotein(a)                     | P08519               |                 | 5.24%           |                 |                 |                 |                 | 5.59%           |                 |
| Beta-2-glycoprotein 1                 | P02749               | ≥6.98%          | 7.35%           | 9.22%           | 3.40%           | ≥4.9%           | 6.13%           | 7.04%           | 8.84%           |
| Beta-2-microglobulin                  | P61769               |                 |                 |                 |                 |                 | 5.81%           |                 |                 |
| Biotinidase                           | P43251               |                 |                 | 6.72%           |                 | ≥4.9%           | 7.39%           | 5.37%           | 6.27%           |
| Carbonic anhydrase 1                  | P00915               |                 |                 |                 |                 |                 |                 |                 | 0.62%           |
| Carboxypeptidase B2                   | Q961Y4               |                 | 5.85%           |                 |                 |                 | 4.68%           |                 |                 |
| Carboxypeptidase N catalytic chain    | P15169               |                 | 8.53%           | 8.63%           |                 | ≥4.9%           |                 | ≥7.94%          | 6.22%           |
| Carboxypeptidase N subunit 2          | P22792               |                 | ≥10.47%         |                 |                 |                 |                 | ≥7.94%          | ≥10.96%         |
| Ceruloplasmin                         | P00450               | ≥6.98%          | 4.93%           | 4.95%           | 3.42%           | ≥4.9%           | 5.25%           | 5.96%           | 4.62%           |
| Cholinesterase                        | P06276               |                 |                 |                 |                 | ≥4.9%           |                 |                 | 3.25%           |
| Clusterin                             | P10909               | ≥6.98%          | ≥10.47%         | ≥11.51%         | ≥4.11%          | ≥4.9%           | ≥10.47%         | ≥7.94%          | ≥10.96%         |
| Coagulation factor X                  | P00742               |                 | ≥10.47%         | 8.39%           |                 | ≥4.9%           |                 | ≥7.94%          | 10.58%          |
| Coagulation factor XII                | P00748               | ≥6.98%          | 6.50%           | 7.58%           | 3.83%           | ≥4.9%           | 7.01%           | ≥7.94%          | 6.12%           |
| Complement C1q subcomponent subunit A | P02745               | ≥6.98%          | 5.36%           | 6.06%           |                 | ≥4.9%           | 7.72%           |                 |                 |
| Complement C1q subcomponent subunit B | P02746               |                 |                 |                 | 2.32%           | 4.41%           | 7.83%           |                 |                 |
| Complement C1q subcomponent subunit C | P02747               | ≥6.98%          | 5.13%           | 4.93%           | 2.44%           | 3.67%           | 8.15%           | 5.47%           | 4.31%           |

Supplementary Table 3

Fractional synthesis rate - % new per day (k)

| Plasma Proteins                          | Uniprot<br>Accession | Subject<br>#003 | Subject<br>#004 | Subject<br>#005 | Subject<br>#007 | Subject<br>#008 | Subject<br>#009 | Subject<br>#010 | Subject<br>#011 |
|------------------------------------------|----------------------|-----------------|-----------------|-----------------|-----------------|-----------------|-----------------|-----------------|-----------------|
| Complement C1r subcomponent              | P00736               | ≥6.98%          | 8.44%           | 10.95%          | 3.51%           | ≥4.9%           | ≥10.47%         | 6.79%           | ≥10.96%         |
| Complement C1r subcomponent-like protein | Q9NZP8               | 6.40%           | 6.14%           | 6.76%           | 2.83%           | 4.13%           | 6.75%           | 5.69%           | 6.80%           |
| Complement C1s subcomponent              | P09871               | ≥6.98%          | 8.71%           | ≥11.51%         | ≥4.11%          | ≥4.9%           | ≥10.47%         | 7.35%           | ≥10.96%         |
| Complement C2                            | P06681               | ≥6.98%          | 9.64%           | 11.12%          | ≥4.11%          | ≥4.9%           | ≥10.47%         | ≥7.94%          | 10.44%          |
| Complement C3                            | P01024               | ≥6.98%          | 9.04%           |                 |                 |                 | 8.42%           | ≥7.94%          |                 |
| Complement C4-A                          | POC0L4               | ≥6.98%          | 9.53%           | 10.35%          | ≥4.11%          | ≥4.9%           | 8.68%           | ≥7.94%          | 9.17%           |
| Complement C4-B                          | POC0L5               | ≥6.98%          | 9.24%           | ≥11.51%         |                 | ≥4.9%           | 5.71%           |                 |                 |
| Complement C5                            | P01031               | ≥6.98%          | 7.66%           | 7.61%           | 3.90%           | ≥4.9%           | 7.35%           | ≥7.94%          | 7.88%           |
| Complement component C6                  | P13671               | ≥6.98%          | ≥10.47%         | 2.24%           | 3.32%           | ≥4.9%           | 10.05%          | ≥7.94%          | 6.49%           |
| Complement component C7                  | P10643               | ≥6.98%          | 6.16%           | 5.72%           | 3.20%           | ≥4.9%           | 9.34%           | 6.18%           | 5.33%           |
| Complement component C8 alpha chain      | P07357               | ≥6.98%          | 8.05%           | 8.88%           | ≥4.11%          | ≥4.9%           | 8.50%           | ≥7.94%          | 7.51%           |
| Complement component C8 beta chain       | P07358               | ≥6.98%          | 6.32%           | 8.99%           | 2.83%           | ≥4.9%           | 5.75%           | 7.78%           | 7.68%           |
| Complement component C8 gamma chain      | P07360               | ≥6.98%          | 7.11%           | 7.62%           | 4.07%           | ≥4.9%           | 8.23%           | 7.51%           | 7.82%           |
| Complement component C9                  | P02748               | ≥6.98%          | 8.37%           | 10.61%          | 4.08%           | ≥4.9%           | 9.30%           | ≥7.94%          | 8.51%           |
| Complement factor B                      | P00751               | ≥6.98%          | 8.23%           | ≥11.51%         | ≥4.11%          | ≥4.9%           | ≥10.47%         | ≥7.94%          | 8.92%           |
| Complement factor H                      | P08603               | ≥6.98%          | 5.98%           | 6.20%           | 3.70%           | ≥4.9%           | 6.58%           | 7.14%           | 5.85%           |
| Complement factor I                      | P05156               | ≥6.98%          | ≥10.47%         | ≥11.51%         | ≥4.11%          | ≥4.9%           | ≥10.47%         | ≥7.94%          | ≥10.96%         |
| Corticosteroid-binding globulin          | P08185               | ≥6.98%          | 5.90%           |                 |                 | ≥4.9%           | 6.41%           | 7.20%           | 5.75%           |
| Extracellular matrix protein 1           | Q16610               |                 |                 |                 | 2.85%           | 4.36%           | ≥10.47%         | ≥7.94%          |                 |
| Fibrinogen alpha chain                   | P02671               | ≥6.98%          | 4.81%           | 7.08%           | 4.06%           | ≥4.9%           | 6.24%           | 7.53%           | 6.12%           |
| Fibrinogen beta chain                    | P02675               | 6.68%           |                 | 5.18%           | 3.63%           | ≥4.9%           | 4.92%           | 5.38%           | 4.66%           |
| Fibrinogen gamma chain                   | P02679               |                 |                 | 5.64%           | 3.88%           | ≥4.9%           | 6.09%           | 5.66%           | 4.82%           |
| Fibronectin                              | P02751               | ≥6.98%          | 8.57%           | 7.95%           | 3.78%           | ≥4.9%           | 7.12%           | 7.93%           | 8.62%           |
| Ficolin-3                                | O75636               | ≥6.98%          | 5.88%           | 11.26%          |                 | ≥4.9%           | 5.27%           | 5.54%           | 5.74%           |
| Gelsolin                                 | P06396               | ≥6.98%          | 7.25%           | 7.85%           | 3.34%           | ≥4.9%           | ≥10.47%         | ≥7.94%          | 7.79%           |
| Glutathione peroxidase 3                 | P22352               |                 |                 | 3.77%           |                 |                 | 5.34%           |                 |                 |
| Haptoglobin                              | P00738               |                 |                 | 8.60%           |                 |                 |                 |                 |                 |
| Haptoglobin-related protein              | P00739               |                 | ≥10.47%         | 8.94%           |                 |                 |                 |                 |                 |
| Hemoglobin subunit alpha                 | P69905               | 1.33%           |                 |                 |                 |                 | 2.26%           |                 | 0.39%           |

**Supplementary Table 3**

**Fractional synthesis rate - % new per day (k)**

| <b>Plasma Proteins</b>                                                 | <b>Uniprot<br/>Accession</b> | <b>Subject<br/>#003</b> | <b>Subject<br/>#004</b> | <b>Subject<br/>#005</b> | <b>Subject<br/>#007</b> | <b>Subject<br/>#008</b> | <b>Subject<br/>#009</b> | <b>Subject<br/>#010</b> | <b>Subject<br/>#011</b> |
|------------------------------------------------------------------------|------------------------------|-------------------------|-------------------------|-------------------------|-------------------------|-------------------------|-------------------------|-------------------------|-------------------------|
| Hemoglobin subunit beta                                                | P68871                       | 1.19%                   | 0.33%                   | 0.65%                   |                         |                         | 1.93%                   |                         | 0.37%                   |
| Hemoglobin subunit delta                                               | P02042                       |                         |                         |                         |                         |                         | 1.21%                   |                         |                         |
| Hemoglobin subunit gamma-1                                             | P69891                       |                         |                         |                         |                         |                         |                         |                         | 0.82%                   |
| Hemopexin                                                              | P02790                       | ≥6.98%                  | 4.34%                   | 3.43%                   | 2.89%                   | ≥4.9%                   | 2.28%                   | 4.16%                   | 4.01%                   |
| Heparin cofactor 2                                                     | P05546                       |                         | 5.43%                   |                         |                         | 2.61%                   |                         | 4.95%                   | 3.83%                   |
| Histidine-rich glycoprotein                                            | P04196                       | ≥6.98%                  | ≥10.47%                 | 10.25%                  | ≥4.11%                  | ≥4.9%                   | ≥10.47%                 | ≥7.94%                  | 7.44%                   |
| Ig gamma-3 chain C region                                              | P01860                       |                         |                         |                         |                         |                         | 3.73%                   |                         |                         |
| Ig kappa chain C region                                                | P01834                       | 1.84%                   |                         |                         |                         |                         | 4.73%                   |                         |                         |
| Ig mu chain C region                                                   | P01871                       |                         |                         |                         |                         |                         | 3.39%                   |                         |                         |
| Immunoglobulin lambda-like polypeptide 5                               | B9A064                       |                         |                         |                         |                         |                         | 3.66%                   |                         |                         |
| Insulin-like growth factor-binding protein complex acid labile subunit | P35858                       | 6.95%                   | 6.28%                   | 8.23%                   | 4.07%                   |                         | 5.88%                   | 6.51%                   |                         |
| Inter-alpha-trypsin inhibitor heavy chain H1                           | P19827                       | ≥6.98%                  | 8.27%                   | 9.04%                   | 3.95%                   | ≥4.9%                   | 5.82%                   | ≥7.94%                  | 7.97%                   |
| Inter-alpha-trypsin inhibitor heavy chain H2                           | P19823                       | ≥6.98%                  | 7.85%                   | 9.37%                   | 3.56%                   | ≥4.9%                   | 6.61%                   | ≥7.94%                  | 8.50%                   |
| Inter-alpha-trypsin inhibitor heavy chain H3                           | Q06033                       | ≥6.98%                  | ≥10.47%                 | ≥11.51%                 | ≥4.11%                  | ≥4.9%                   | 9.55%                   | ≥7.94%                  | 10.22%                  |
| Inter-alpha-trypsin inhibitor heavy chain H4                           | Q14624                       | ≥6.98%                  | 7.87%                   | 9.05%                   | 3.60%                   | ≥4.9%                   | 7.58%                   | ≥7.94%                  | 7.63%                   |
| Kallistatin                                                            | P29622                       | ≥6.98%                  | 7.76%                   | 7.69%                   | 3.19%                   | 4.77%                   | 7.38%                   | 3.76%                   | 7.67%                   |
| Kininogen-1                                                            | P01042                       | ≥6.98%                  | 8.19%                   | 7.53%                   | ≥4.11%                  | ≥4.9%                   | 8.90%                   | ≥7.94%                  | 7.24%                   |
| Leucine-rich alpha-2-glycoprotein                                      | P02750                       | ≥6.98%                  | 7.46%                   | 8.00%                   | ≥4.11%                  | ≥4.9%                   | 7.86%                   | ≥7.94%                  | 8.05%                   |
| Low affinity immunoglobulin gamma Fc region receptor III-A             | P08637                       |                         |                         |                         |                         |                         | 5.17%                   |                         |                         |
| Lumican                                                                | P51884                       | 2.60%                   | 1.52%                   | 1.75%                   | 1.22%                   | 1.44%                   | 2.97%                   | 1.81%                   | 1.06%                   |
| N-acetylmuramoyl-L-alanine amidase                                     | Q96PD5                       | ≥6.98%                  | 6.87%                   | 8.62%                   | 3.27%                   | ≥4.9%                   | 6.61%                   | 7.43%                   | 8.91%                   |
| Peptidase inhibitor 16                                                 | Q6UXB8                       |                         |                         | ≥11.51%                 | 2.92%                   |                         |                         |                         |                         |

Supplementary Table 3

Fractional synthesis rate - % new per day (k)

| Plasma Proteins                                      | Uniprot<br>Accession | Subject<br>#003 | Subject<br>#004 | Subject<br>#005 | Subject<br>#007 | Subject<br>#008 | Subject<br>#009 | Subject<br>#010 | Subject<br>#011 |
|------------------------------------------------------|----------------------|-----------------|-----------------|-----------------|-----------------|-----------------|-----------------|-----------------|-----------------|
| Phosphatidylinositol-glycan-specific phospholipase D | P80108               |                 |                 |                 |                 |                 |                 |                 | ≥10.96%         |
| Pigment epithelium-derived factor                    | P36955               | ≥6.98%          | 9.81%           | ≥11.51%         | ≥4.11%          | ≥4.9%           | ≥10.47%         | ≥7.94%          | ≥10.96%         |
| Plasma kallikrein                                    | P03952               | ≥6.98%          | 5.51%           | 6.93%           | ≥4.11%          | ≥4.9%           | 5.83%           | 7.33%           | 5.62%           |
| Plasma protease C1 inhibitor                         | P05155               | ≥6.98%          | 7.86%           | 9.81%           | 3.49%           | ≥4.9%           | ≥10.47%         | ≥7.94%          | ≥10.96%         |
| Plasminogen                                          | P00747               | ≥6.98%          | 7.38%           | 7.88%           | 3.26%           | ≥4.9%           | 6.99%           | 6.80%           | 7.41%           |
| Plasminogen-related protein B                        | Q02325               |                 |                 |                 |                 |                 |                 |                 | 3.85%           |
| Platelet basic protein                               | P02775               | ≥6.98%          | 6.80%           |                 | ≥4.11%          | ≥4.9%           | 8.81%           | ≥7.94%          | 6.66%           |
| Platelet factor 4                                    | P02776               |                 | 5.83%           |                 |                 |                 |                 |                 | 6.27%           |
| Platelet factor 4 variant                            | P10720               | ≥6.98%          |                 |                 |                 |                 |                 |                 |                 |
| Properdin                                            | P27918               |                 |                 |                 |                 | 4.51%           | 9.76%           |                 | 4.10%           |
| Protein AMBP                                         | P02760               | ≥6.98%          | ≥10.47%         | 10.51%          | ≥4.11%          | ≥4.9%           | 8.25%           | ≥7.94%          | 10.84%          |
| Protein Z-dependent protease inhibitor               | Q9UK55               | ≥6.98%          |                 |                 |                 | ≥4.9%           |                 | ≥7.94%          | ≥10.96%         |
| Prothrombin                                          | P00734               | ≥6.98%          | 8.01%           | 8.45%           | ≥4.11%          | ≥4.9%           | 7.30%           | ≥7.94%          | 7.60%           |
| Retinol-binding protein 4                            | P02753               | ≥6.98%          | ≥10.47%         | ≥11.51%         | ≥4.11%          | ≥4.9%           | ≥10.47%         | ≥7.94%          | ≥10.96%         |
| Selenoprotein P                                      | P49908               |                 | ≥10.47%         | ≥11.51%         |                 | ≥4.9%           |                 | ≥7.94%          | ≥10.96%         |
| Serotransferrin                                      | P02787               | ≥6.98%          | 4.41%           | 4.28%           | 3.41%           | ≥4.9%           | 5.24%           | 6.00%           | 4.49%           |
| Serum amyloid P-component                            | P02743               | ≥6.98%          | 9.02%           | 10.87%          | ≥4.11%          | ≥4.9%           | 7.42%           | ≥7.94%          | 6.33%           |
| Serum paraoxonase/arylesterase 1                     | P27169               |                 |                 | 6.30%           |                 | ≥4.9%           | 5.47%           | 7.63%           | 6.07%           |
| Sex hormone-binding globulin                         | P04278               | ≥6.98%          | 5.39%           | 6.26%           | 3.47%           | ≥4.9%           | 8.91%           | 6.50%           | 5.57%           |
| Tetranectin                                          | P05452               | 6.01%           | 6.03%           | 5.66%           | 3.89%           | ≥4.9%           | 10.06%          | 7.30%           | 5.34%           |
| Thrombospondin-1                                     | P07996               | ≥6.98%          | 6.39%           |                 |                 |                 |                 |                 | 5.81%           |
| Thyroxine-binding globulin                           | P05543               | ≥6.98%          | 5.27%           |                 | 0.93%           | ≥4.9%           | 6.73%           | ≥7.94%          | 5.90%           |
| Vitamin D-binding protein                            | P02774               | ≥6.98%          | 9.11%           | ≥11.51%         | ≥4.11%          | ≥4.9%           | 8.82%           | ≥7.94%          | 9.72%           |
| Vitronectin                                          | P04004               | ≥6.98%          | 7.53%           | 7.82%           | 3.35%           | 4.22%           | 8.34%           | 4.75%           | 6.61%           |
| von Willebrand factor                                | P04275               | ≥6.98%          | 6.28%           |                 | 3.10%           | ≥4.9%           | 8.25%           |                 | 5.70%           |
| Zinc-alpha-2-glycoprotein                            | P25311               | ≥6.98%          |                 | ≥11.51%         | 3.85%           |                 | ≥10.47%         |                 |                 |
